# Supplementary material for: Convergent utilization of APN receptor by hedgehog merbecoviruses
Source: Research Square preprint supplement (doi:10.21203/rs.3.rs-8368823/v1), 2026-02-18
Supplement: Supplementary file 1 [file 225f0fba78dd2420ebb194b4.xlsx]

## Sheet: Sheet1
GenBank ID	NCBI isolate	Name in this study	发现地点		Spike protein ID	nuclear acid sequence	protein sequence
OM451213	Erinaceus hedgehog coronavirus HKU31 isolate HeB-MO1	MO1	China	Asia	UMO75628.1	ATGATACGCTCAGTGTTTCTACTGATGTGCTTGTTAACACTTATAAAAAGTGGTGATGCTAATTGCATAG CTGTAGACATGCAACCACCCTACTTTCAGAGAGATTGGCCTCGTCCAATTAATATGAGTGCAGCTGACGG TATTATATACCCCGTCGGCCGTACATATGCAAATATAACTCTAATGCTAAGTGGCCTTTTTCCACACCAA GCAGATAAGGGTAAGCAGTATATTTATTCCATGTATCACATGAAGTATAACCAAGGGTTAAATAAGCCCT TTATTTCTAATTACTCCTACTATACAGAACCGTTTGATAATGGGTTCGTAGTTAGAATAGGAGCTAATTC AAATATAACTGGCTCTTCTGTAGTAGGAAGTGCAAATGCTACTG…	MIRSVFLLMCLLTLIKSGDANCIAVDMQPPYFQRDWPRPINMSAADGIIYPVGRTYANITLMLSGLFPHQ ADKGKQYIYSMYHMKYNQGLNKPFISNYSYYTEPFDNGFVVRIGANSNITGSSVVGSANATVKKIYPALM LGSVVGKFPSNKTGRYFNHTLVILPEKCGTQITALYCVLQPKNQTNCTGHSTYTSYVLVENKTCSTDADG NLKQSLQTWFDLKDCLFEEKYNVSADEREEWFGITQDQQGVHLYTSRKNGFKSNNMFLFATLPIYDRLRY YTVMPRSIKTNANNDHMAWSAFYVYQLHRLNYLVEFDVEGYIVRASDCAANDYTQLQCSYGQFDMNSGVY SASYFNAQPRGYYYVANDLEECALDVLFKNNAPPIANYSRRVFT…
MK907286	Erinaceus hedgehog coronavirus HKU31 strain F6	F6	China	Asia	QGA70692.1	ATGATACGCTCAGTGTTTCTACTGATGTGCTTGTTAACACTTATAAAAAGTGGTGATGCAAATTGCATAG TTGTAGATATGCAACCATCCTATTTTCAGAGAGATTGGCCTAGGCCTATTAATATGAGTGCAGCTGATGG TATTATATACCCTGTAGGTCGCACATACGCTAATATTACCATTATGCTAAGTGGTCTTTTCCCACATCAA GCAGATAAGGGTAAGCAGTATATTTATTCCATGTATCACATGAAGTTTAATCAAGGGGTTAATGACCCTT TCATTTCTAATTACTCCTATTACACAGAACCATTTGATAATGGTTTCGTAGTTAGAATAGGAGCTAATTC TAATATAACTGGCTCTTCTGTAGTGGGAAGTGCTAATGCTACTG…	MIRSVFLLMCLLTLIKSGDANCIVVDMQPSYFQRDWPRPINMSAADGIIYPVGRTYANITIMLSGLFPHQ ADKGKQYIYSMYHMKFNQGVNDPFISNYSYYTEPFDNGFVVRIGANSNITGSSVVGSANATVKKIYPALM LGSVVGKFPSNKTGRYFNHTLVILPEKCGTQITALYCVLQPKNQTNCTGHTTYTSYVLVENKTCSTDADG NLKQSLQTWFDLKDCLFEKKYNVSADEREEWFGITQDQQGVHLYTSRKNGFKSNNMFLFATLPIYERLRY YTVMPRSIKTTANNDHMAWSAFYIYQLHKLNYLVEFDVEGYIVRASDCGANDYTQLQCSYGQFDMNSGVY SASYFNAQPRGYYYVANELEECALDVLFKNIAPQIANYSRRVFT…
MK907287	Erinaceus hedgehog coronavirus HKU31 strain Rs13	Rs13	China	Asia	QGA70702.1	ATGATACGCTCAGTGTTTCTACTGATGTGCTTGTTAACACTTATAAAAAGTGGTGATGCAAATTGCATAG TTGTAGATATGCAACCATCCTATTTTCAGAGAGATTGGCCTAGGCCTATTAATATGAGTGCAGCTGATGG TATTATATACCCTGTAGGTCGCACATACGCTAATATTACCATTATGCTAAGTGGTCTTTTCCCACATCAA GCAGATAAGGGTAAGCAGTATATTTATTCCATGTATCACATGAAGTTTAATCAAGGGGTTAATGACCCAT TCATTTCTAATTACTCCTATTACACAGAACCATTTGATAATGGTTTCGTAGTTAGAATAGGAGCTAATTC TAATATAACTGGCTCTTCTGTAGTGGGAAGTGCTAATGCTACTG…	MIRSVFLLMCLLTLIKSGDANCIVVDMQPSYFQRDWPRPINMSAADGIIYPVGRTYANITIMLSGLFPHQ ADKGKQYIYSMYHMKFNQGVNDPFISNYSYYTEPFDNGFVVRIGANSNITGSSVVGSANATVKKIYPALM LGSVVGKFPSNKTGRYFNHTLVILPEKCGTQITALYCVLQPKNQTNCTGHTTYTSYVLVENKTCSTDADG NLKQSLQTWFDLKDCLFEKKYNVSADEREEWFGITQDQQGVHLYTSRKNGFKSNNMFLFATLPIYERLRY YTVMPRSIKTTANNDHMAWSAFYIYQLHKLNYLVEFDVEGYIVRASDCGANDYTQLQCSYGQFDMNSGVY SASYFNAQPRGYYYVANELEECALDVLFKNIAPQIANYSRRVFT…
MN879331	Erinaceus amurensis coronavirus HKU31 cw_6	cw_6	China	Asia	QOQ34381.1	ATGATACGCTCAGTGTTTCTACTGATGTGCTTGTTAACACTTATAAAAAGTGGTGATGCCAATTGCATAG CAGTAGATATGCAACCATCCTACTTTCAGAGAGATTGGCCTAGGCCTATTAATATGAGTGCTGCTGATGG TATTATATACCCTGTAGGCCGTACATATTCTAATATTACTATAATGCTAAGTGGTCTTTTTCCACATCAA GCAGATAAGGGTAAGCAGTATATTTATTCCATGTATCACATGAAGTATAATCAAGGGCTTAATTATCCCT TCATTTCTAATTACTCCTATTATACAGAATCGTTTGATAATGGATTCGTAGTAAGAATAGGGGCTAATTC AAATATAACTGGCTCTTCTGTAGTTGGAAGTGCAAATGCTACTG…	MIRSVFLLMCLLTLIKSGDANCIAVDMQPSYFQRDWPRPINMSAADGIIYPVGRTYSNITIMLSGLFPHQ ADKGKQYIYSMYHMKYNQGLNYPFISNYSYYTESFDNGFVVRIGANSNITGSSVVGSANATVKKIYPALM LGSVVGKFPSNKTGRYFNHTLVILPEKCGTQITALYCVLQPKNQTNCTGHTTYTSYVLVENKTCSTDADG NLKQSLQTWFDLKDCLFEYKYNVSADEREEWFGITQDQQGVHLYTSRKNGFKSNNMFLFATLPIYEKLRY YTVMPRSIRTNANNDHMAWSAFYIYQLHKLNYLVEFDVEGYIVRASDCAANDYTQLQCSYGQFDMNSGVY SASYFNAQPRGYYYVANDLEECTLDVLFKNNAPQIANYSRRVFT…
MW246795.1	Betacoronavirus Erinaceus isolate ErinaceusCoV/Italy/116988-1/2018	IT8-1	Italy	Europe	QRN68024.1	ATGAAACGCTCAGTGTGTCTACTGATGTGCTTGTTAATGTTTATAAAAATAACCCCAAGCGAGGGAACAT GTATAGGTGTTGAGATGAATGCCACATACTTCATTAAAGATTGGCCTCAGCCAATCAATATGAGCAAGGC GGATGGTCTCTTGTACCCCACTGCCCGCACTTATTCTAATATCACTATAATGCTTGATGGATTGTTTCCA CATCAAGAAGATCCTGGTGATATGTATGTTTATTCACAATCTCATAGGGGCAGACCTTTCATTTCTAATT ACTCTCTCATTACGCAGGAGTTTGGTAATGGTATAGTAATTAGAATAGGTTCAGCTGCTAATAAAACTGG TAGTCCAATTATTTCTAATAATAACTCCACGTTTCAAACAATGA…	MKRSVCLLMCLLMFIKITPSEGTCIGVEMNATYFIKDWPQPINMSKADGLLYPTARTYSNITIMLDGLFP HQEDPGDMYVYSQSHRGRPFISNYSLITQEFGNGIVIRIGSAANKTGSPIISNNNSTFQTMKKLYPALLF GSSVGKFPNNNKTGAYFNHTLIILPEKCGTVITALYCVLQPKNDTNCTGHSDYVSYVLFENYRCSTTADG NLKTSLQQWFDLKDCLFEKKYNVTDDEREEWFGITQDQQGVHLYTSRKNGYSNNMFLFATLPIYDQISYY TVMPRSINASTWSSYHAFSAFYIYKLHKTNYMFDFDVNGYITRAVDCSYNDYTQLQCSYGQFDMNSGVYS ASYFNARSRGFYYEAAELTECELDVLFKNDAPIIANYSRRVFTN…
MW246796.1	Betacoronavirus Erinaceus isolate ErinaceusCoV/Italy/50265-19/2018	IT5-19	Italy	Europe	QRN68031.1	ATGATACGCTCAGTGTGTCTACTGATGTGCTTGTTAATGTCTATAAAGGCACCCCCAAGCGTGGAAGGAG CATGCCCATTTGTTGAAATGAATGCTTCATATTTTGTTAAAGATTGGCCTCAGCCAATCAATATGAGCAA AGCGGATGGTCTTTTATACCCCGTTTCGCGTACTTATGCTAATATCACTATAATGCTTGATGGATTGTTT CCGCACCAAGCAGATCCTGGTGATATGTATGTTTATTCTCAATCTCATAGGGGCAAACCTTTCATTTCTA ATTACTCTCTCATTACGCAGGAGTTTGGTAATGGTATAGTAATTAGAATAGGTTCAGCTGCTAATAAAAC TGGTAGTCCAATTATTTCTAATGTGAACTCCACGTTTCAAAAAA…	MIRSVCLLMCLLMSIKAPPSVEGACPFVEMNASYFVKDWPQPINMSKADGLLYPVSRTYANITIMLDGLF PHQADPGDMYVYSQSHRGKPFISNYSLITQEFGNGIVIRIGSAANKTGSPIISNVNSTFQKMKKLYPALL FGSSVGKFPNNNKTGAYFNHTLIILPEKCGTVITALYCVLQPKNETNCTGDAGYVSYVLFENYSCDATSD GNLKTDLQQWFNLKDCLFEKKYNVTDDEREEWFGITQDQQGVHLYTSRKNGFSNNMFLFATLPIYDQISY YTVMPRSINASTSRSYHAFSAFYIYKLHKTNYMVDFDVNGYITRAVDCSYNDYTQLQCSYGQFDMDSGVY SASYFNARSRGFYYEAVELTECELDVLFKNDAPIIANYSRRVFT…
MW246798.1	Betacoronavirus Erinaceus isolate ErinaceusCoV/Italy/50265-17/2018	IT5-17	Italy	Europe	QRN68055.1	ATGATACGCTCAGTGTGTCTACTGATGTGCTTGTTAATGTCTATAAAGGCACCCCCAAGCGTGGAAGGGG CATGCCCAGTTGTTGAAATGAATGCTTCCTATTTTATTAAAGATTGGACTGAGCCGATTAATATGAGCAG AGCAGATGGTATCTTGTACCCCACTGCCCGCACTTATTCTAATATCACTATAATGCTTGATGGATTGTTC CCACATCAAGAAGATCCAGGTGATATGTATGTTTATTCTCAATCTCATAAGGGCAAACCTTTTATTTCTA ATTACTCTCTCATTACGCACGAGTTTGGTAATGGTATAGTAATTAGAATAGGTTCAGCTGCTAATAAAAC TGGTAGTCCAATTATATCTAATCAGAACTCCACGTTTCAAATAA…	MIRSVCLLMCLLMSIKAPPSVEGACPVVEMNASYFIKDWTEPINMSRADGILYPTARTYSNITIMLDGLF PHQEDPGDMYVYSQSHKGKPFISNYSLITHEFGNGIVIRIGSAANKTGSPIISNQNSTFQIMKKLYPALL FGSSVGKFPNNNKTGAYFNHTLIILPEKCGTVITALYCVLQPKNETNCTGHSDYVSYVLFENYSCSAAAD NNLKTSLQQWFDLKDCLFEKTYNVTDDEREEWFGITQDQKGVHLYTSRKNGYSNNMFLFATLPIYDQISY YTVMPRSINASSWKSYHAFSAFYIYKLHKTNYMVDFDVNGYITRAVDCSYNDYTQLQCSYGQFDMNSGVY SASYFNARSRGYYYEGSELTECALDVLFKGNAPIIANYSRRVFT…
MW246797.1	Betacoronavirus Erinaceus isolate ErinaceusCoV/Italy/50265-1/2018	IT5-1	Italy	Europe	QRN68048.1	ATGATACGCTCAGTGTGTCTACTGATGTGCTTGTTAATGTTTATAAAAACAACCCCAAGCGAGGGAACAT GTATAGGTGTTGAGATGAACGCCTCATACTTTGTTAAAGATTGGCCTCAGCCAATTAATATGAGCCAAGC AGATGGTCTTTTATACCCTGTTTCGCGCACTTATGCTAATATCACAATAATGCTTGATGGATTGTTTCCA CATCAAGAAGATCCTGGTGATATGTATGTTTATTCACAATCTCATGGGGGCAAACCTTTCATTTCTAATT ACTCTCTCATTACGCATGAGTTTGGTAATGGTATAGTAATTAGAATAGGTTCAGCTGCTAATAAAACTGG TAGTCCAATTATTTCTAATCAGAACTCCACGTTTCAAACAATGA…	MIRSVCLLMCLLMFIKTTPSEGTCIGVEMNASYFVKDWPQPINMSQADGLLYPVSRTYANITIMLDGLFP HQEDPGDMYVYSQSHGGKPFISNYSLITHEFGNGIVIRIGSAANKTGSPIISNQNSTFQTMKKLYPALLF GSSVGKFPNNNKTGAYFNHTLIILPEKCGTVITALYCVLEPKNETNCTGHSGYVSYVLFENYSCSAVADN NLKTSLQQWFTLKDCLFEKKYNVTEDEREEWFGIMQDQQGVHLYTSRKNGFSNNMFLFATLPIYDQISYY TVMPRSINASTSRSYHAFSAFYIYKLHKTNYMVDFDVNGYITRAVDCSYNDYTQLQCSYGQFDMDSGVYS ASYFNARSRGFYYEAAELTECELDVLFKNDAPIIANYSRRVFTN…
MW246799.1	Betacoronavirus Erinaceus isolate ErinaceusCoV/Italy/50265-11/2019	IT5-11	Italy	Europe	QRN68066.1	ATGATACGCTCAGTGTGTCTACTGATGTGCTTGTTAATGTCTATAAAGGCACCCCCAAGCGTGGAAGGAG CATGCCCAGTTGTTGAAATGAATGCTTCATATTTTATTAAAGATTGGCCTCAGCCAATTAATATGAGCAA AGCGGACGGTCTTTTATACCCCGTTTCGCGTACTTATTCTAATATCACTATAATGCTTGATGGATTGTTT CCACACCAAGCAGATCCTGGTGATATGTATGTTTATTCACAATCTCATAGGGGCAAACCTTTCATTTCTA ATTACTCTCTCATTACGCATGAGTTTGGTAATGGTATAGTAATTAGAATAGGTTCAGCTGCTAATAAAAC TGGTAGTCCAATTATTTCTAATGTGAACTCCACGTTTCAACAAA…	MIRSVCLLMCLLMSIKAPPSVEGACPVVEMNASYFIKDWPQPINMSKADGLLYPVSRTYSNITIMLDGLF PHQADPGDMYVYSQSHRGKPFISNYSLITHEFGNGIVIRIGSAANKTGSPIISNVNSTFQQMKKLYPALL FGSSVGEFPSNNKTGAYFNHTLIILPEKCGTVITALYCVLQPKNDTNCTGHSGYVSYVLFENYSCSTSDD GNLKASLEQWFTLKDCLFEKKYNVTDDEREEWFGITQDQQGVHLYTSRKNGFSNNMFLFATLPIYDQISY YTVMPRSINASTLSSYHAFSAFYIYKLHKTNYMVDFDVNGYITRAVDCSYNDYTQLQCSYGQFDMHSGVY SASYFNAHSRGYYYEAAELTECALDVLFKGNAPIIANYSRRVFT…
MW246800.1	Betacoronavirus Erinaceus isolate ErinaceusCoV/Italy/50265-12/2019	IT5-12	Italy	Europe	QRN68078.1	ATGATACGCTCAGTGTGTCTACTGATGTGCTTGTTAATGTTTATAAGAATAACCCCAAGCGAGGGAACAT GTATAAGTGTTGAGATGAGTGCCTCATATTTTGTTAAAGATTGGCCTCAGCCAATCAATATGAGCAAAGC GGACGGTCTGTTATACCCCGTTTCGCGTACTTATTCTAATATCACTATAATGCTTGATGGATTGTTTCCG CACCAAGCAGACCCTGGTGATATGTATGTTTATTCACAATCTCATAAGGGCAAACCTTTCATTTCTAATT ACTCTCTCGTTACGCATGAGTTTGGTAATGGTATAGTAATTAGAATAGGCTCAGCTGCTAATAAAACTGG TAGTCCAATTATTTCTAATCAAAACTCCACGTTTCAACAAATGA…	MIRSVCLLMCLLMFIRITPSEGTCISVEMSASYFVKDWPQPINMSKADGLLYPVSRTYSNITIMLDGLFP HQADPGDMYVYSQSHKGKPFISNYSLVTHEFGNGIVIRIGSAANKTGSPIISNQNSTFQQMKKLYPALLF GSSVGKFPSNNKTGAYFNHTLVILPEKCGTVITALYCVLQPKNETNCTGHSGYVSYVLFENYSCSAVADN NLKTSLQHWFTLKDCLFEKKYNVTDDEREEWFGITQDQQGVHLYTSRKNGYSNNMFLFATLPIYDQISYY TVMPRSINASTWNSYHAFSAFYIYKLHKTNYMVDFDVNGYITRAVDCSYNDYTQLQCSYGQFDMNSGVYS ASYFNARSRGFYYEAAELTECELDVLFKNDAPIIANYSRRVFTN…
MW246802.1	Betacoronavirus Erinaceus isolate ErinaceusCoV/Italy/50265-15/2019	IT5-15	Italy	Europe	QRN68101.1	ATGATACGCTCAGTGTGTCTACTGATGTGCTTGTTAATGTTTATAAAGGCACCTCTAAGCGTGGAAGAAG CATGCCCCGTTGTTGAAATGAATGCTTCATACTTTATTAAAGATTGGCCTGAGCCAATCAATATGAGCAA AGCGGATGGCCTTTTATACCCCGTTTCTCGCACTTATGCTAATATCACTATAATGCTTGATGGATTGTTT CCACACCAAGCAGATCCTGGTGATATGTATGTTTATTCTCAATCTCATAGCGGCCGACCTTTTATTTCCA ATTACTCTCTCGTTACTAATGAGTTTGGTAATGGTATAGTAATTAGAATAGGTCCAGCTGCTAATAAAAC TGGTAGTTCAATTATTTCTAATCAGAACTCCACGTTTCAAACAA…	MIRSVCLLMCLLMFIKAPLSVEEACPVVEMNASYFIKDWPEPINMSKADGLLYPVSRTYANITIMLDGLF PHQADPGDMYVYSQSHSGRPFISNYSLVTNEFGNGIVIRIGPAANKTGSSIISNQNSTFQTMKKLYPALL FGSSVGKFPINNKTGAYFNHTLIILPEKCGTVITALYCVLQPKNETNCTGDSGYVSYVLFENYTCSANAD NNLKTSLQQWFDLNDCLFEKKYNVTDDEREEWFGITQDQQGVHLYTSRKNGFSNNMFLFATLPIYDQISY YTVMPRSINASTWKSYHAFSAFYIYKLHKTNYMVDFDVNGYITRAVDCSYNDYTQLQCSYGQFDMDSGVY SASYFNARSRGYYYEAAELTECALDVLFKGNAPIIANYSRRVFT…
KC545386.1	Betacoronavirus Erinaceus/VMC/DEU/2012 isolate ErinaceusCoV/2012-216/GER/2012	GER216	Germany	Europe	AGX27810.1	ATGATACGCTCAGCGTGTCTACTGATGTGCTTGTTAATGTTTATAAAAGCAACCCCAAGCGAGGGAACAT GTATATCTGTTGACATGCAGCCCTCATATTTTATCAAAAATTGGTCTATGCCAATTAATATGAGTAAAGC AGATGGTGTTTTATACCCTGTTGGGCGTACTTATTCTAATATCACAATAACGCTTGAAGGGTTATTTCCA CACCAAGCAGATCGTGGTGATATGTATGTTTACTCACAATCTCATAAAGGCAGGCCTTTCATTTCTAATT ATTCTCTCGTTACTAATGATTTTGGTAATGGCATAGTAATTAGAATAGGTTCTGCTGCTAATAAAACTGG TAGTCCTATTATTTCTAATATTGCTAGTAACTTTCAGATTATGA…	MIRSACLLMCLLMFIKATPSEGTCISVDMQPSYFIKNWSMPINMSKADGVLYPVGRTYSNITITLEGLFP HQADRGDMYVYSQSHKGRPFISNYSLVTNDFGNGIVIRIGSAANKTGSPIISNIASNFQIMKKLYPALLF GSAVGKFPANNKTGAYFNHSLVILPEKCGTVITALYCVLEPKNDTNCTGSSGYVSYVLFENFSCDATTDG NLKNSLQQWFNIKDCLFEKNYNVTDDEREEWFGIIQDQQGVHLYTSRKNGYSNNMFLFATLPIYDQILYY TVMPRSINASNYASYHAFSAFYIYKLHKINYMVDFDVNGYITRAVDCGYNDYTQLQCSYGQFDMDSGVYS ASYFNARSRGYYYEAAELTECDLDVLFKNDAPIIANYSRRVFTN…
NC_039207.1	Betacoronavirus Erinaceus/VMC/DEU/2012 isolate ErinaceusCoV/2012-174/GER/2012	GER174	Germany	Europe	YP009513010	ATGATACGCTCAGCGTGTCTACTGATGTGCTTGTTAATGTTTATAAAAGCAACCCCAAGCGAGGGAACAT GTATATCTGTTGACATGCAGCCCTCATATTTTATCAAAAATTGGTCTATGCCAATTAATATGAGTAAAGC AGATGGTGTTTTATACCCTGTTGAGCGTACTTATTCTAATATCACAATAACGCTTGAAGGGTTATTTCCA CACCAAGCAGATCGTGGTGATATGTATGTTTACTCACAATCTCATAAAGGCAGGCCTTTCATTTCTAATT ATTCTCTCGTTACTAATGATTTTGGTAATGGCATAGTAATTAGAATAGGTTCTGCTGCTAATAAAACTGG TAGTCCTATTATTTCTAATATTGCTAGTAACTTTCAGATTATGA…	MIRSACLLMCLLMFIKATPSEGTCISVDMQPSYFIKNWSMPINMSKADGVLYPVERTYSNITITLEGLFP HQADRGDMYVYSQSHKGRPFISNYSLVTNDFGNGIVIRIGSAANKTGSPIISNIASNFQIMKKLYPALLF GSAVGKFPANNKTGAYFNHSLVILPEKCGTVITALYCVLEPKNDTNCTGSSGYVSYVLFENFSCDATTDG NLKNSLQQWFNIKDCLFEKNYNVTDDEREEWFGIIQDQQGVHLYTSRKNGYSNNMFLFATLPIYDQILYY TVMPRSINASNYASYHAFSAFYIYKLHKINYMVDFDVNGYITRAVDCGYNDYTQLQCSYGQFDMDSGVYS ASYFNARSRGYYYEAAELTECDLDVLFKNDAPIIANYSRRVFTN…
NC_039207.1	Betacoronavirus Erinaceus/VMC/DEU/2012 isolate ErinaceusCoV/2012-174/GER/2012	UK19	United Kingdom	Europe	QCC20713.1	ATGATACGCTCAGTGTGTCTACTGATGTGCTTGTTAATGTTTATAAAAGCAACCCCAAGCGAGGGAACAT GTATAGATGTTGAGATGAATGCATCATACTTTATCAAAGATTGGCGTATGCCAATTAACATGAGTAAGGC AGATGGTGTTTTATACCCCGTTGCTCGTACTTATTCTAATATCACAATAATGCTTGAAGGGTTATTTCCA CACCAAGCAGATCCTGGTGATATGTATGTTTATTCACAATCTCATAGAGGCAAGCCTTTTATTTCTAATT ACTCTCTCGTTACTAATGATTTTGGTAATGGCATAGTAATTAGAATAGGTTCCGCTGCTAATAAAACTGG TAGTCCTATTATTTCTAATATTAATAGTACGTTTCAGATTATGA…	MIRSVCLLMCLLMFIKATPSEGTCIDVEMNASYFIKDWRMPINMSKADGVLYPVARTYSNITIMLEGLFP HQADPGDMYVYSQSHRGKPFISNYSLVTNDFGNGIVIRIGSAANKTGSPIISNINSTFQIMKKLYPALIF GSTVGKFPNNNKTGAYFNHSLIILPQKCGTVITALYCVLQPKNDTNCTGSSGYVSYVLFENYSCDATTDN NLKTNLQQWFNLKDCLFEENYNVTDDEREEWFGITQDQQGVHLYTSRKNGYSNNMFLFATLPIYDKLLYY TVMPRSINVAITEYHAFSAFYIYKLHKVNYMVDFDVNGYITRAVDCAYNDYTQLQCSYGQFDMDSGVYSA SYFNARSRGYYYEAAELTECELDVLFKNDAPIIANYSRRVFTNC…
PP724614.1	Hedgehog coronavirus 1 isolate H9	PTH9	Portugal	Europe	XAJ09624.1	ATGATACGCTCAGTGTGTCTACTGATGTGCTTGTTAATGTTTATAAAAGCACCCCTAAGCGAGGGAACAT GTATAGGTGTTGAGATGAATGCCACATTCTTTATCAGAGATTGGCATGTGCCAATTAACATGAGTAAAGC AGATGGTATTCTATATCCCATTGATCGTACTTATTCTAATATCACTATAATGCTTGAAGGGTTGTTTCCA CACCAAGCAGATCCTGGTGATATGTATGTTTATTCACAATCTCATAAAGGCAGGCCCTTTATTTCTAATT ACTCTCTCATTATTAATGATTTTGGTGATGGTATAGTAATTAGAATAGGTTCAGCTGCTAATAAAACTGG TAGTCCAATAATTAGTAATATTAACAGCAACTTCCAGCAAATGA…	MIRSVCLLMCLLMFIKAPLSEGTCIGVEMNATFFIRDWHVPINMSKADGILYPIDRTYSNITIMLEGLFP HQADPGDMYVYSQSHKGRPFISNYSLIINDFGDGIVIRIGSAANKTGSPIISNINSNFQQMKKLYPALIF GSAAGKFPNNNKTGAYFNHSLIILPEKCGTVITALYCVLEPKNETNCTGHSGYVSYVLFENFSCDATTDG NLKTSLQQWFNIKDCLFEKKYNVTDDEREEWFGITQDQQGVHLYTSRKNGYSNNMFLFDTLPIYDQLLYY TVMPRSINASTLRPASYHAFAAFYIYKLHKINYMVDFDVNGYITRAADCGYNDYTQLQCSYGQFDMDSGV YSASYFNARSKGFYYEAGELTECELDVLFKNNAPIIANYSRRVF…
PP421220.1	Betacoronavirus Erinaceus isolate EriCoV/RU/MOW15-1/2022	RU15-1	Russia	Europe	XCN28775.1	ATGATACGCTCAGTGTGTCTACTGATGTGCTTGTTAATGTTTATAAAGGCACCTCTAAGCGTGGAAGGAG CATGCATGCAAGTTGAAATGAATGCTTCCTATTTTATTCATGATTGGCCTGAGCCGATTAACATGAGCAG AGCTGATGGTATCTTGTATCCAACAGCTCGTACCTATTCTAATATCACTATAATGCTTGATGGATTATTT CCACATCAAGAAGATCCTGGTGATATGTATGTTTATTCTCAATCTCATAAGGGCAAACCTTTTATTTCTA ATTACTCACTCGTTACGCAGGAATTTGGTAATGGTATAGTAATTAGAATAGGGGCAGCTGCTAATAAAAC TGGTTCATCAATTATTTCTAATATTAATGCCAGTAGAGGTGTAA…	MIRSVCLLMCLLMFIKAPLSVEGACMQVEMNASYFIHDWPEPINMSRADGILYPTARTYSNITIMLDGLF PHQEDPGDMYVYSQSHKGKPFISNYSLVTQEFGNGIVIRIGAAANKTGSSIISNINASRGVMKKLYPALL FGSSVGKFPSNNKTGAYFNHTLIILPEKCGTVITALYCILEPKNDTYCTGHSGYVSYVLFENYSCDATSD GNLKTSLQQWFSIKNCLFEKKYNVTDDEREEWFGITQDQQGVHLYTSRKNGYSNNMFLFATLPIYDQIHY YTVMPRSINASTWQAYHAFAAFYIYKLHKTNYLVDFDVNGYITRAADCGYNDFTQLQCSYGQFDIDSGVY SASYFNARSRGFYYEAAELTECELDVLFKNNAPAIANYSRRVFT…
PP421221.1	Betacoronavirus Erinaceus isolate EriCoV/RU/MOW15-2/2022	RU15-2	Russia	Europe	XCN28786.1	ATGATACGCTCAGTGTGTCTACTGATGTGCTTGTTAATGTCTATAAAGGCACCCTTAAACGTGGAAGGAG CATGCCCAGTTGTTGAAATGAATGCTTCATACTTTATTAAAGATTGGCCGCAGCCGATTAATATGAGCAG AGCAGATGGTATCTTGTATCCCACTGCTCGCACCTATTCTAATATCACTATAATGCTTGATGGATTATTC CCACATCAAGATGATCCGGGTGATATGTATGTTTATTCTCAAAGTCATAGGGGCAGACCTTTTATTTCTA ATTACTCCCTCATTACTCAGGAATTTGGTAATGGTATAGTAATTAGAATAGGTTCAGCTGCTAATAAGAC TGGTTCTTCAATTATTTCTAATATAAATTCCAGTCAAGGTATAA…	MIRSVCLLMCLLMSIKAPLNVEGACPVVEMNASYFIKDWPQPINMSRADGILYPTARTYSNITIMLDGLF PHQDDPGDMYVYSQSHRGRPFISNYSLITQEFGNGIVIRIGSAANKTGSSIISNINSSQGIMKKLYPALL FGSSVGKFPSNNKTGAYFNHTLIILPEKCGTVITALYCILEPKNDTNCTGDSQYVSYVLFENYSCDAVSD GNLKTRLLQWFTLKNCLFEKKYNVTDDEREEWFGITQDQQGVHLYTSRKNGYSNNMFLFATLPIYDQIHY YTVMPRSINASTWQAYHAFAAFYIYKLHKTNYLVDFDVNGYITRAADCGYNDFTQLQCSYGQFDIDSGVY SASYFNARSRGFYYEAAELTECELDVLFKNNAPAIANYSRRVFT…
PP721361.1	Hedgehog coronavirus 1 isolate bCoV/Erinaceus/Poland/J24/2020	PLJ24	Poland	Europe	XAJ09723.1	ATGATACGCTCAGTGTGTCTACTGATGTGCTTGTTAATGTTTATAAAAGCACCTCCAAGCGAGGGAACTT GTATAGGTGTTGAGATGAACGCTTCATACTTCATTAGAGATTGGCCACAGCCAATCAACATGAGTAAAGC AGATGGTGTTTTATATCCCGTTGCTCGTACTTATTCTAATATCACAATAATGCTTGAAGGGTTGTTTCCA CACCAAGCAGATCGTGGTGATATGTATGTTTATTCACAATCTCATAAAGGCATACCTTTTATTTCTAATT ACTCACACATTACTAATGATTTTGGTAATGGTTTAGTAATTAGAATAGGTGCTGCTGCTAATAAAACTGG TAGTCCTATTATTTCTAATATTAATAGCACTTTCCAGCCTATGA…	MIRSVCLLMCLLMFIKAPPSEGTCIGVEMNASYFIRDWPQPINMSKADGVLYPVARTYSNITIMLEGLFP HQADRGDMYVYSQSHKGIPFISNYSHITNDFGNGLVIRIGAAANKTGSPIISNINSTFQPMKKLYPALLF GSTVGKFPTNNKTGAYFNHSLIILPEKCGTIITALYCVLEPKNETNCTGGSGYVSYVLFENFSCSATTDD NLKTSLQQWFTLKDCLFEKKYNVTDDEREEWFGITQDQQGVHLYTSRKNGFSNNMFLFATLPIYDRISHY TVMPRSINASTWNSYHAFSAFYIYKLHKTNYMVDFDVNGYITRAVDCGYNDYTQLQCSYGQFDMDSGVYS ASYFNARSRGYYYEAAELTECELDVLFKNKAPIIANYSRRVFTN…
PP721362.1	Hedgehog coronavirus 1 isolate bCoV/Erinaceus/Poland/J64/2021	PLJ64	Poland	Europe	XAJ09735.1	ATGATACGCTCAGTGTGTCTACTGATGTGCTTGTTAATGTTTATAAAAACACCCCCAAGCGAGGGAACTT GTATAGATGTTGAGATGAACGCTTCATACTTCATTAGAGATTGGCCACAGCCTATCAACATGAGTAAAGC AGATGGTGTTTTATATCCCGTTGCTCGTACTTATTCTAATATCACAATAATGCTTGAAGGGTTGTTTCCA CACCAAGCAGATCGTGGTGATATGTATGTTTATTCACAATCTCATAAAGGCAAACCTTTTATTTCTAATT ACTCACACATTACTAATGATTTTGGTAATGGTTTAGTAATTAGAATAGGTGCTGCTGCTAATAAAACTGG TAGTCCTATTATTTCTAATATCGCGTCTAACTTCCAGACTATGA…	MIRSVCLLMCLLMFIKTPPSEGTCIDVEMNASYFIRDWPQPINMSKADGVLYPVARTYSNITIMLEGLFP HQADRGDMYVYSQSHKGKPFISNYSHITNDFGNGLVIRIGAAANKTGSPIISNIASNFQTMKKLYPALLF GSTVGKFPTNNKTGAYFNHSLIILPEKCGTVITALYCVLEPKNDTNCTGHSGYVSYVLFENYSCSATTDN NLKTSLQQWFNLKDCLFEKKYNVTDDEREEWFGITQDQQGVHLYTSRKNGFSNNMFLFATLPIYDQILHY TVMPRSINASTWNSYHAFAAFYIYKLHKTNYMVDFDVNGYITRAVDCGYNDYTQLQCSYGQFDMDSGVYS ASYFNARSRGYYYEAAELTECELDVLFKNNAPIIANYSRRVFTN…
PQ869635.1	Hedgehog coronavirus 1 isolate Erinaceus/FR/22-7137/2022	FR7137	France	Europe	XNJ65105.1	ATGATACACTCAGTGTTTCTACTGACGTGCTTGTTAATGTTTATAAAAGCACCCCTAAGCGAGGGAATAT GTATACAAGTTGAAATGAAGCCCTCGTTTTTTAATAAAAGTTGGACTATGCCAATTAATATGAGTAAGGC AGATGGTGTTTTATACCCCGTTCAGCGTACTTATTCTAATATCACAATAATGCTTGAAGGGTTGTTTCCA CACCAAGCAGACCCTGGTGATATGTATGTTTATTCACAATATCATAATAGCAAGCCTTTTATTTCTAATT ACTCTCACATTGTTAATGAGTTTGACGACGGTATAGTAATTAGAATAGGTTCAGCTGCTAATAAAACTGG TAGTTCAATTATTAGTCCTCAGAATAATCGGCTAATGAAGAAAC…	MIHSVFLLTCLLMFIKAPLSEGICIQVEMKPSFFNKSWTMPINMSKADGVLYPVQRTYSNITIMLEGLFP HQADPGDMYVYSQYHNSKPFISNYSHIVNEFDDGIVIRIGSAANKTGSSIISPQNNRLMKKLYPALIFGS AVGKFPNNNKTGAYFNHSLVILPEKCGTVITALYCVLEPKNDDGCTGHSSYISYVLTENFTCNASTDGNL KNSLQQWFNIKDCLFEEKYNVTDDEREEWFGITQDQQGVHLYTSRKNGFSNNMFLFATLPVYDQILYYTV MPRSIKGEGNQYYAFSAFYIYKLHKINYMVDFDVNGYITRAVDCGYNDYTQLQCSYGQFDMDSGVYSASY FNARSRGFYYEAAELTECELDVLFKNDAPIIANYSRRVFTNCNY…
PQ869634.1	Hedgehog coronavirus 1 isolate Erinaceus/FR/22-3151/2023	FR3151	France	Europe	XNJ65093.1	ATGATACGCTCAGTGTTTCTACTGACGTGCTTGTTAATGTTTATAAAAGCACACCCAAGCGAGGGAACAT GTATAGCTGTTGACATGCGGCCCTCATTTTTTATCAGAAATTGGACTATGCCAATTAATATGAGTAAGGC GGATGGTGTTTTATACCCCATTGATCGTACTTATTCTAATATCACAATAATGCTTGAAGGGTTGTTTCCA CACCAAGCAGATCCTGGTGATATGTATGTTTATTCACAATCTAATAACGGCGTGCCTTTCATTTCTAATT ACTCTCTCATTACTAATGAGTTTGGTGATGGTATAGTAATTAGAATAGGTTCAGCTGCTAATAAGACTGG TAGTTCAATTGTTTCTCAAAGTTACAACCGGCCAATGAAGAAAC…	MIRSVFLLTCLLMFIKAHPSEGTCIAVDMRPSFFIRNWTMPINMSKADGVLYPIDRTYSNITIMLEGLFP HQADPGDMYVYSQSNNGVPFISNYSLITNEFGDGIVIRIGSAANKTGSSIVSQSYNRPMKKLYPALLFGS AVGKFPNNNKTGAYFNHSLIILPDNCGTVITALYCVLQPKNETNCTGHSGYVSYVLFENFSCDATTDGNL KTSLQQWFNMGDCLFERKYNVTDDEREEWFGITQDQQGVHLYTSRKNGYSNNMFLFDTLPIYDQLLYYTV MPRSIKSNTSSSYHAFSAFYIYKLHKINYMVDFDVNGYITRAVDCGYNDYTQLQCSYGQFDMDSGVYSAS YFNARSRGSYYEAAELTECELDVLFKNDAPIIANYSRRVFTNCN…
PX460032.1	Hedgehog coronavirus isolate EriCoV/ER17/HUN/2023	ER17	Hungary	Europe	YBK88845.1	ATGATACGCTCAGTGTGTCTACTGATGTGCTTGTTAATGTTTATAAAAGCACCCCCAAGCGAGGGAACATGTATAGATGTTGAAATGAATGCAACATACTTCATCAAAGATTGGCGTATGCCAATTAACATGAGTAAAGCAGATGGTGTTCTATACCCCGTTGCTCGTACTTATTCTAATATCACAATAATGCTTGAAGGGTTGTTTCCACACCAAGCAGACCCTGGTGCTATGTATGTTTATTCACAATCTCATAGAGGCAAGCCTTTTATTTCTAATTACTCTCACATTGTCAATGATTTTGGTGATGGTATAGTAATTAGAATAGGCTCTGCTGCTAATAAAACTGGTAGTCCAATTATTTCTAATAATAATAACACTTTCCAGAAAATGAAGAAA…	MIRSVCLLMCLLMFIKAPPSEGTCIDVEMNATYFIKDWRMPINMSKADGVLYPVARTYSNITIMLEGLFPHQADPGAMYVYSQSHRGKPFISNYSHIVNDFGDGIVIRIGSAANKTGSPIISNNNNTFQKMKKLYPALIFGSTVGKFHANNKTGAYFNHSLIILPEKCGTVITALYCVLEPKNETNCTGHSHYVSYVLFENYSCDATTDGNLKNSLHQWFNIKDCLFEKKFNVTDDEREEWFGITQDQQGVHLYTSRKNGFSNNMFLFATLPVYDQILYYTVMPRSINASAWNQYHAFSAFYIYKLHKINYMVDFDVNGYITRAVDCGYNDYTQLQCSYGQFDMDSGVYSASYFNARSRGFYYEAAELTECELDVLFKNNAPIIANFSRRVFTNCNYNL…
PV359182.1	Betacoronavirus Erinaceus isolate EriCov_23_17_MOS-a	MOS-17	Russia	Europe	XQP08624.1	ATGATACGCTCAGTGTGTCTACTGACGTGCTTGTTAATGTTTATAAAAGCACCCCCAGGCGTGGACGGAGTATGCATGCAAGTTGAAATGAATGCTACATACTTTATTAGAGATTGGCCTCAGCCGATTAATATGAGCCGAGCAGATGGCATTTTATATCCCACTGCTCGCACCTATTCTAATATCACTATAATGCTTGATGGATTATTTCCACATCAAGAAGACCGCGGTGATATGTATGTTTATTCTCAATCTCATAAGGGCAAGCCCTTTATTTCTAATTACTCCCTCATTACTCAAGAATTTGGTAATGGTATAGTAATTAGAATAGGTGCACATGCTAATAAAACTGGCTCGTCGATTATTTCTCAGTTTAACGACAGGTCTAATATAACGAAG…	MIRSVCLLTCLLMFIKAPPGVDGVCMQVEMNATYFIRDWPQPINMSRADGILYPTARTYSNITIMLDGLFPHQEDRGDMYVYSQSHKGKPFISNYSLITQEFGNGIVIRIGAHANKTGSSIISQFNDRSNITKKLYPALLFGSSVGKFPSNNKTGAYFNHTLIILPEKCGTVITALYCILEPKNETNCTGHSSYVSYVLFENYSCDATPDGNLKTSLEQWFTLKNCLFEEKYNVTDDEREEWFGITQDQQGVHLYTSRKNGFSNNMFLFATLPIYDQILYYTVMPRSINATSWNTYHAFAAFYIYKLHKTNYLVDFDVNGYIIRAADCGYNDFTQLQCSYGQFDMDSGVYSASYFNARSRGFYYEAADLTECELDVLFKNDAPLIANYSRRVFTNCNYN…
PV359183.1	Betacoronavirus Erinaceus isolate EriCov_23_23_MOS-F_2	MOS-23	Russia	Europe	XQP08634.1	ATGATACGCTCAGTGTGTCTACTGATGTGCTTGTTAATGTTTATAAAGGCACCCTTAAACGTGGAAGGAGCATGCCCAGTTGTTGAAATGAATGCTTCATATTTTATTAAAGATTGGCCGCAGCCGATTAATATGAGCAGAGCAGATGGTATCTTGTATCCCACTGCTCGCACCTATTCTAATATCACTATAATGCTTGATGGATTATTCCCACATCAAGATGATCCGGGTGATATGTATGTTTATTCTCAAAGTCATAGGGGCAGACCTTTTATTTCTAATTACTCCCTCGTTACTCAGGAATTTGGTAATGGTATAGTAATTAGAATAGGTTCAGCTGCTAATAAGACTGGCTCTTCAATTATTTCTAATTTAAATTCCAGTCAAGGTATAATGAAG…	MIRSVCLLMCLLMFIKAPLNVEGACPVVEMNASYFIKDWPQPINMSRADGILYPTARTYSNITIMLDGLFPHQDDPGDMYVYSQSHRGRPFISNYSLVTQEFGNGIVIRIGSAANKTGSSIISNLNSSQGIMKKLYPALLFGSSVGKFPANNKTGAYFNHTLIILPEKCGTVITALYCILEPKNDTNCTGHSQYVSYVLFENYSCHATSDGNLKTSLSHWFTLKNCLFEKKYNVTDDEREEWFGITQDQQGVHLYTSRKNGYSNNMFLFATLPIYDQIHYYTVMPRSINASTWQSYHAFAAFYIYKLHKTNYLVDFDVNGYITRAADCGYNDFTQLQCSYGQFDMDSGVYSASYYNARSRGFYYEAAELTECELDVLFKNNAPAIANYSRRVFTNCNYN…
PV359184.1	Betacoronavirus Erinaceus isolate EriCov_23_3_MOS-a	MOS-3	Russia	Europe	XQP08644.1	ATGATACGCTCAGTGTGTCTACTGATGTGCTTGTTAATGTTTATAAAGGCACCCTTAAACGTGGAAGGAGCATGCCCAGTTGTTGAAATGAATGCTTCATATTTTATTAAAGATTGGCCGCAGCCGATTAATATGAGCAGAGCAGATGGTATCTTGTATCCCACTGCTCGCACCTATTCTAATATCACTATAATGCTTGATGGATTATTCCCACATCAAGATGATCCGGGTGATATGTATGTTTATTCTCAAAGTCATAGGGGCAGACCTTTTATTTCTAATTACTCCCTCGTTACTCAGGAATTTGGTAATGGTATAGTAATTAGAATAGGTTCAGCTGCTAATAAGACTGGCTCTTCAATTATTTCTAATTTAAATTCCAGTCAAGGTATAATGAAG…	MIRSVCLLMCLLMFIKAPLNVEGACPVVEMNASYFIKDWPQPINMSRADGILYPTARTYSNITIMLDGLFPHQDDPGDMYVYSQSHRGRPFISNYSLVTQEFGNGIVIRIGSAANKTGSSIISNLNSSQGIMKKLYPALLFGSSVGKFPANNKTGAYFNHTLIILPEKCGTVITALYCILEPKNDTNCTGHSQYVSYVLFENYSCHATSDGNLKTSLSHWFTLKNCLFEKKYNVTDDEREEWFGITQDQQGVHLYTSRKNGYSNNMFLFATLPIYDQIHYYTVMPRSINASTWQSYHAFAAFYIYKLHKTNYLVDFDVNGYITRAADCGYNDFTQLQCSYGQFDMDSGVYSASYYNARSRGFYYEAAELTECELDVLFKNNAPAIANYSRRVFTNCNYN…
PV359185.1	Betacoronavirus Erinaceus isolate EriCov_23_4_MOS-o	MOS-4	Russia	Europe	XQP08652.1	ATGATACGCTCAGTGTGTCTACTGATGTGCTTGTTAATGTTTATAAAGGCACCCTTAAACGTGGAAGGAGCATGCCCAGTTGTTGAAATGAATGCTTCATATTTTATTAAAGATTGGCCGCAGCCGATTAATATGAGCAGAGCAGATGGTATCTTGTATCCCACTGCTCGCACCTATTCTAATATCACTATAATGCTTGATGGATTATTCCCACATCAAGATGATCCGGGTGATATGTATGTTTATTCTCAAAGTCATAGGGGCAGACCTTTTATTTCTAATTACTCCCTCGTTACTCAGGAATTTGGTAATGGTATAGTAATTAGAATAGGTTCAGCTGCTAATAAGACTGGCTCTTCAATTATTTCTAATTTAAATTCCAGTCAAGGTATAATGAAG…	MIRSVCLLMCLLMFIKAPLNVEGACPVVEMNASYFIKDWPQPINMSRADGILYPTARTYSNITIMLDGLFPHQDDPGDMYVYSQSHRGRPFISNYSLVTQEFGNGIVIRIGSAANKTGSSIISNLNSSQGIMKKLYPALLFGSSVGKFPANNKTGAYFNHTLIILPEKCGTVITALYCILEPKNDTNCTGHSQYVSYVLFENYSCHATSDGNLKTSLSHWFTLKNCLFEKKYNVTDDEREEWFGITQDQQGVHLYTSRKNGYSNNMFLFATLPIYDQIHYYTVMPRSINASTWQSYHAFAAFYIYKLHKTNYLVDFDVNGYITRAADCGYNDFTQLQCSYGQFDMDSGVYSASYYNARSRGFYYEAAELTECELDVLFKNNAPAIANYSRRVFTNCNYN…
