# Supplementary material for: Convergent utilization of APN receptor by hedgehog merbecoviruses
Source: Research Square preprint supplement (doi:10.21203/rs.3.rs-8368823/v1), 2026-02-18
Supplement: Supplementary file 2 [file 7111f419c87c9a7864c7e897.xlsx]

## Sheet: Sheet1
species	Receptor	GSA accession ID:	nuclear acid sequence	protein sequence
Erinaceus amurensis	ACE2	CRX555648	ATGTTGGGCTCTTTCTGGCTCTTTCTCAGCCTTGTTGCTGTGACTGCTGCTCAAACCAACATTGAGGAAGAGGCCAAGAAATTTTTGGATGATTTTAACAGGCAAGCTGAGAATGTGTCTTACGAAAGTGCCCTGGCTTCTTGGAATTATAACATCAATATTACTGAAGAGAATATCCAAAAGATGAATGACGCTGGGGCCAAATGGTCTGAATTTTATGAAGAACAGTCCAAGATTGCCAGAAATTATCCACTGCAGGACATTCAGAATCCCACTGTGAGGCGTCAGTTGCAGATCCTTCAGCAGAATGGGTCATCAGTGCTCTCAGCAGACAAAATCAAACGACTGAATGACATTCTAAACAGAATGAGCACCATTTACAGCACTGGAAAAGTTTGT…	MLGSFWLFLSLVAVTAAQTNIEEEAKKFLDDFNRQAENVSYESALASWNYNINITEENIQKMNDAGAKWSEFYEEQSKIARNYPLQDIQNPTVRRQLQILQQNGSSVLSADKIKRLNDILNRMSTIYSTGKVCKPDNPQDCLLLEPGLDRIMENSTDYNLRLWAWEGWRAVVGKQLRPLYEEYVELKNEMAKANNYEDYGDYWRGDYEAEGDAGYNYSREQLIEDVERTFAEIKPLYEHLHAYVRRKLMDTYPSHISPTGGLPAHLLGDMWGRFWTNLYRLTVPYGQKPNIDVTEEMVNQKWNADRIFKEAEKFFVSVGLPSMTEGFWNNSMLTEPQDGRKVVCHPTAWDLGNGDFRIKMCTKVTMDDFLTAHHEMGHIQYDMAYAQQPYLLRSGANEG…
Erinaceus amurensis	DPP4	CRX555648	ATGAAGACGCGGTGGAAGGTGCTCTTGGGACTGCTGGGGACAGCTGCTCTTGTCACCATCATCACAGTGCCTGTGGTTCTTCTGAACAAAGATGATGCTGCTAATGACAGTCGAAGAACTTATACTCTAAGTGACTATTTAAAAAACACTTTTAGACTGAAGGGCTACTCCTTGCAATGGGTTTCAGATCACGAATACCTCTACAATCAAGAAAACAATATCTTGTTATTCAATGCTGAAAATGGAAACAGCTCCATGTTCTTGGAGAACAGTACATTTGATGAACTTGACTATTCTGTAAATGATTATTTCGTGTCTCCCGATCGACAGTTTATCCTCTTTGAGTACAACTATGTGAAGCAATGGAGACATTCTTACACAGCTTCTTATGACATTTAT…	MKTRWKVLLGLLGTAALVTIITVPVVLLNKDDAANDSRRTYTLSDYLKNTFRLKGYSLQWVSDHEYLYNQENNILLFNAENGNSSMFLENSTFDELDYSVNDYFVSPDRQFILFEYNYVKQWRHSYTASYDIYDVNKRQLITEEKIPSKIQWVTWSPAGHKLAYVWNNDVYVKNEPNLPSQRITWIGKENEIYNGITDWVYEEEIFGSYSALWWSPNGSFLAYAQFNDTGVPLIEYSFYYNESLQYPKTIRVPYPKAGATNPTVKLFVVNTDTVSPDNNLTSVQITAPASVSNGDHYLCGVTWVTKERISLQWLRRIQNYSIMDICDYDQPNGLWNCLVGRQRTEESTTGWVGRFRPEEPHFTSDGNSFYKVISNEDGYKHICYFQIDTKNCTFITKGP…
Erinaceus amurensis	APN	CRX555648	ATGGCCAAGGGCTTCTTCATTTCCAAGACTGTGGGCATTCTGGGCATCGTCCTGGCCGTGGCAGCCGTGAGCACCATCATCGCCCTGTCCGTGGTGTACTCGCAGGAGAAGAACAAGAACACAGCCAGCAGCACCACCGCCGCCCCCTCCGTAACCACCTCCCAGGCCACCACCTTAGACCAAAGCAAACCATGGAACCGATACCGCCTCCCCGAGTCTCTGGAGCCCCACTCCTACAGTGTGGTGCTGAGGCCCTACCTGGACCCCAATGCTCAGGGGCTCTACATCTTTGAGGGCAACAGCACCGTCCGCTTCATCTGCAAGAGCGCCACCAATGTCATCATCATCCACAGCAAGAAACTTAACTACACCAGGGAGCCTAAGGTGGTCCTTCGCGGC…	MAKGFFISKTVGILGIVLAVAAVSTIIALSVVYSQEKNKNTASSTTAAPSVTTSQATTLDQSKPWNRYRLPESLEPHSYSVVLRPYLDPNAQGLYIFEGNSTVRFICKSATNVIIIHSKKLNYTREPKVVLRGVDAQAPQIQNIELVEVTEYLVVHLKNNLEVSKTYEMDSTFRGELADDLAGFYRSEYMEDNVKKVVATTQMQAADARKSFPCFDEPAMKAYFNITIIHPKDRTALSNMPPKGPSKPLPEDNNWLITEFETTPKMSTYLLAYIVSEFKEVNAVTPNDIQIRIWARPRAIDAGHGDYALKVTGPILTFFAQHYNTSYPLSKSDQIGLPDFNAGAMENWGLVTYRESALLFDNLTSSIGNQERVVTVIAHELAHQWFGNLVTIRWWNDLW…
Erinaceus amurensis	TMPRSS2	CRX555648	ATGGCGCTGAACTCAGGACCCCCTCTAGCCATGGGGCCTTACTATGAGAACCATGGATTCCAGCCCGAGGGCCTGTACGCTCCGGGGCCGGTGGTGTTCCCCAGTGTCTACACCGTGTACCCAGCACCCAGCTACCCTCCTGCTGTGCCCCAGTACTCGCCTCGCGCCCCGCCCACTGCCGCGACCCTCCGCCGCCAGCCCAAGGCCCCGTCCAGGACCTGCAGCCCAAGGGCCCGGAAGACCGTGCTCGTCTCCCTGGCCCTGGGGGCCGTGCTGGCTGGGGCCGCGGCCGCCGTCCTGCTCTGGAGGTTCGTGGACAGCAAGTGCTCGGTGGCCGGCATGGAGTGTGGCTCCTCGGGGGCCTGTGTCAGCGCCTCGCACTGGTGTGACGGTGTCCTG…	MALNSGPPLAMGPYYENHGFQPEGLYAPGPVVFPSVYTVYPAPSYPPAVPQYSPRAPPTAATLRRQPKAPSRTCSPRARKTVLVSLALGAVLAGAAAAVLLWRFVDSKCSVAGMECGSSGACVSASHWCDGVLHCPSGEDENRCVRLYGPSFILQVYSYQSKSWYPVCQDGWTEGHGRAACQDLGYRNSFFSSRGVADDSGATSFMKLNVSSGGRDLYQRPYPSDSCSSKMVVSLRCIDCGVSKLSRQGRIVGGRPVSPGDWPWQVSLQVQHTHVCGGSLITPQWILTAAHCVEQPLDNPRYWTAFVGLLSQSAMHFGLGHRVERVIVHPSYDSTTKNYDVALFKLQSPLAVNNFVRPVCLPNPGLRLEPTQPCWISGWGATYEKGKTSDMLNAAQVRL…
Atelerix albiventris	APN	CRX911825	ATGGCCAAGGGCTTCTTCATTTCCAAGACTGTGGGCATTCTGGGCATCGTCCTGGCCGTGGCAGCCGTGAGCACCATTATTGCCCTGTCCGTGGTGTACTCTCAGGAGAAGAACAAGAACACAGCCAGCAGCACCACCGCCGCCCCCTCTGTAACCACCTCCCAGGCCACCACCTTAGACCAAAGCAAACCATGGAACCGATACCGCCTCCCTGAGTCTCTGGAGCCCCACTCCTACAGTGTGGTGCTGAGGCCCTACCTGGACCCCAATGCTCAGGGGCTCTACATCTTTGAGGGCAACAGCACTGTCCGCTTCATCTGCAAGAGCGCCACCAATGTCATCATCATCCACAGCAAGAAACTTAACTACACCAGGGAGCCTAAGGTGGTCCTTCGCGGC…	MAKGFFISKTVGILGIVLAVAAVSTIIALSVVYSQEKNKNTASSTTAAPSVTTSQATTLDQSKPWNRYRLPESLEPHSYSVVLRPYLDPNAQGLYIFEGNSTVRFICKSATNVIIIHSKKLNYTREPKVVLRGVDAQAPQIQNIELVGVTEYLVVHLKNNLEVSKTYEMDSTFRGELADDLAGFYRSEYMESNVKKVVATTQMQAADARKSFPCFDEPAMKAYFNITIIHPKNHTALSNMPPKGPSKPLPEDNNWLITEFETTPKMSTYLLAYIVSEFKEVNTVTPNDIQIRIWARPSAIDAGHGDYALKVTGPILTFFAQHYNTSYPLSKSDQIGLPDFNAGAMENWGLVTYRENALLFDNLTSSIGNQERVVTVIAHELAHQWFGNLVTIRWWNDLW…
