# Supplementary material for: Convergent utilization of APN receptor by hedgehog merbecoviruses
Source: Research Square preprint supplement (doi:10.21203/rs.3.rs-8368823/v1), 2026-02-18
Supplement: Supplementary file 4 [file c2012bd166a751a0b6aafaf6.xlsx]

## Sheet: Sheet1
Antibody Name	Antigen	HKU31-MO1 IC50	RU15-1 IC50	VH--aa	VL--aa
BD23-0001	HKU31-MO1	0.0249278	/	QVQLQQSGAELVRSGASVKMSCKASGYTFTSYNMHWVKQTPGQGLEWIGYIYPGNGDTNYNRKFKGKATLTADTSSSTAYMQISSLTSEDSAVYFCARDNYGNYYFDYWGQGTTLTVSS	DIQMTQSPASLAVSLGQRATISCRASESVDNYGISFMNWFQQKPGQPPKLLIYAASNQGSGVPARFSGSGSGTDFSLNIHPMEEDDTAMYFCQQSKEVPYTFGGGTKLEIK
BD23-0002	HKU31-MO1	0.00311613	/	EVQLQESGAELVKPGASVKMSCKAFGYTFTTYPIEWMKQNHGKSLEWIGNFHPYNYDTKYNEKFKGKAQLTVEKSSSTVYLELSRLTSDDSAVYYCARQNYGNFYFDYWGQGTTLTVSS	EIVLTQSPASLAVSLGQRATISCRASESVDNYGISFMNWFQQKPGQPPKLLIYAASNQGSGVPARFSGSGSGTDFSLNIHPMEEDDTAMYFCQQSKEVPPTFGGGTKLELK
BD23-0005	HKU31-MO1	0.00841737	/	EFQLQQSGPELVKPGASVKISCKTSGYTFTDYNMHWVKQSHGKSLEWIGYIYPYNGGTGYNQKFKSKATLTVDNSSSTAYMELRSLTSEDSAVYYCARSRYDGFDYWGQGTTLTVSS	DIQMTQSPASLSASVGETVTITCRASENIYSYLAWYQQKQGKSPQLLVYNVKTLAEGVPSRFSGSGSGTQFSLKINSLQPEDFGSYYCQHRYVTPFTFGSGTKLEIK
BD23-0006	HKU31-MO1	0.014277	/	QVQLQQSGAEVVKPGASVKMSCKAFGYTFTTYPIEWMKQNHGKSLEWIGNFHPYNDDTKYNEKFKGKAQLTVEKSSSTVYLELSRLTSDDSAVYYCARQNYGNFFFDYWGQGTTLTVSS	DIQMTQSPAALAVSLGQRATISCRASESVDNYGISFMNWFQQKPGQPPKLLIYAASNQGSGVPARFSGSGSGTDFSLNIHPMEEDDTAMYFCQQSKEVPPTFGGGTKLEIK
BD23-0007	HKU31-MO1	0.00361149	/	QPDLQQSGAELVRSGASVKMSCKASGYTFTSYSMHWVKQTPGQGLEWIGYIYPGNGDTNYNQKFKGKATLTADTSSSTAYMQISSLTSEDSAVYFCARDNYGNYYFDYWGQGTTLTVSS	NIMMTQSPASLAVSLGQRATISCRASESVDNYGISFMNWFQQKPGQPPKLLIYAASNLGSGVPARFSGSGSGTDFSLNIHPIEEDDTAMYFCQQSKEVPYTFGGGTKLEIK
BD23-0009	HKU31-MO1	0.118852	/	EVMLVESGAELVRSGASVKMSCKASGYTFTSYNMHWVKQTPGQGLEWIGSIYPGNGGTNYNQKFKGKATLTADTSSTTAYMQISSLTSEDSAVYFCARDNYGNYYFDYWGQGTTLTVSS	ETTVTQSPASLTVSLGQRATISCRASESVDNYGISFMNWFQQKPGQPPKLLIYAASNQGSGVPARFSGSGSGTDFSLNIHPMEEDDTAMYFCQQSKEVPYTFGGGTKLELK
BD23-0010	HKU31-MO1	0.00345135	/	EVQLLETGAELVKPGASVKLSCTASGFNIKDTYIHWVNQRPEQGLEWIGRIDPANGNTNYDPKFQGKATITADTSSNTAYLHLSSLTSEDTAVYYCARGVPFTYWGLGTLVTVSS	DIQMTQSSSYLSVSLGGRVTITCKASDHIYNWLAWYQQKPGNAPRLFISGATSLETGLPSRFSGSGSGKDYTLSITSLQTEDVATYYCQQYWNTPPTFGGGTKLEIK
BD23-0011	HKU31-MO1	>5	/	QGELQQSGPELVKPGASVRISCKASGYTFTNYYIHWVKLRPGQGLEWIGWIYPGIVNTKYNEKFKGKATLTADHSSSTAYMQLSSLTSEDSAVYFCARQGYRNEMDYWGQGTSVTVSS	DIQMTQSPALMSASPGEKVTMTCSASSSVSYMYWYQQKPRSSPKPWIYLTSNLASGVPARFSGSGSGTSYSLTISSMEAEDAATYYCQQWSSNPLTFGDGTRLEIK
BD23-0014	HKU31-MO1	0.090564	/	EVQLLETGAELVKPGASVKLSCTASGFNIKDTYMHWVKQRPEQGLEWIGRIDPANGNTEYDPKFQGKATVTADTSSNTAYLQLSSLTSEDTAVYYCARGVPFTYWGQGTLVTVSS	DIQMTQSSSYLSVSLGGRVTITCKASDHINNWLAWYQQKPGNAPRLLISGATSLETGVPSRFSGSGSGKDYTLSITSLQTEDVATYYCQQYWSTPPTFGGGTKLEIK
BD23-0016	HKU31-MO1	>5	/	EVQLKESGAELARPGASVKMSCKASGYTFTSYTIHWVKQRPGQGLEWIGYINPSSGYTNYNQRFKDKATLTADKSSSTAYMQLSSLTSEDSAVYYCARDIYFGMEYWGQGTSVTVSS	EIVLTQSPSSLSASLGDTITITCHASQNINVWLSWYQQKPGNIPKLLIYKASNLHTGVPSRFSGSGSGTGFTLTISSLQPEDIATYYCQQGQSYPRTFGGGTKLELK
BD23-0018	HKU31-MO1	>5	/	EFQLQQSAAELARPGASVKMSCKASGYTFTTYTMHWVKQRPGQGLEWIGFINPSSGYTDYNQKFKDKTTLTADKSSSTAYMQLSTLTSEDSAVYYCARSEYFDVWGAGTTVTVSS	DIQMTQSQKFMSTSVGDRVSITCKASQNVRTAVAWYQQKPGQSPKTLIYLASSRHTGVPDRFTGSGSGTDFTLTISNVQSEDLADYFCLQHWNYPYTFGGGTKLEIK
BD23-0019	HKU31-MO1	0.00214327	/	EVQLQQSGAELVRSGASVKMSCKASGYTFTSYNMHWVKQTPGQGLEWIGYIYPGNGGTNYNQRFKGKATLTADTSSSTAYMQIISLTSEDSAVYFCARDNYGNYYFDYWGQGTTLTVSS	DIQMTQSPASLAVSLGQRATISCRASESVDNYGISFMNWFQQKPGQPPKPLIYAASNQGSGVPARFSGSGSGTDFSLNIHPMEEDDTAMYFCQQSKEVPYTFGGGTKLEIK
BD23-0023	HKU31-MO1	0.00109057	/	DVKLVESGAELVKPGASVKLSFTASGFNIKDTYMHWVKQRPEQGLEWIGRIDPANGNTKYDPKFQGKATISSDTSSNTAYLQLSSLTSEDTAVYYCLRGAPFAYWGQGTLVTVSS	DIQMTQSSSYLSVSLGGRVTITCKASDHINNWLAWYQQKPGNAPRLLISGATSLETGVPSRFSGSGSGKDYTLSITSLQTEDVATYYCQQYWSTPYTFGGGTKLEIK
BD23-0025	HKU31-MO1	>5	/	PVQLQQPGAELVRSGASVKMSCKASGYTFSSYNIHWVKQTPGQGLEWIGYIYPGNGGTNYNRKFKGKATLTADTSSNTAYMQISSLTSEDSAVYFCARDNYGNYYFDYWGQGTTLTVSS	DIVMTQTPASLAVSLGQRATISCRASESVDNYGISYMNWFQQKPGQPPKLLIYAASNQGSGVPARFSGSGSGTDFSLNIHPMEEDDTAMYFCQQSKEVPYTFGGGTKLEIK
BD23-0027	HKU31-MO1	0.00729725	/	QFQLQQSGAELVRSGASVKMSCKASGYTFTSYNMHWVKQTPGQGLEWIGYIYPGNGGTNYNQKFKGKATLTADTSSSTAYMQISSLTSEDSAVYFCARDNYGNYYFDYWGQGTTLTVSS	DIQMTQSPASLAVSLGQRATISCRASESVDNYGISFMNWFQQKPGQPPKLLIYAASNQGSGVPARFSGSGSGTDFSLNIHPMEEDDTAMYFCQQSKEVPYTFGGGTRLEIK
BD23-0028	HKU31-MO1	0.0384147	/	EVQLQQSGAELVRSGASVKMSCKASGYTFTSYNLHWVKQTPGQGLEWIGYIYLGNGGTNYNQKFKGKATLTADTSSSTAYMQISSLTSEDSAVYFCARDNHGNYYFDFWGQGTTLTVSS	EIEMTQSPASLAVSLGQRATISCRASESVDNYGISFMNWFQQKPGQPPKLLIYAASNQGSGVPARFSGSGSGTDFSLNIHPMEEDDTAMYFCQQSKEVPYTFGGGTKLEIK
BD23-0029	HKU31-MO1	0.00235024	/	QVQLEQSGAELVKPGASVKLSCTASGFNIKDTYMHWVKQRPEQGLEWIGRIDPANGNTEYDPKFQGKATITADTSSNTAYLQLGSLTSEDTAVYYCLRGVPFAYWGQGTLVTVSA	DIQMTQSSSYLSVSLGGRVTITCKASDHINNWLAWYQQKPGNAPRLLISGATSLETGLPSRFSGSGSGKDYTLSITSLQTEDVATYYCQQYWSIPPTFGGGTKLEIK
BD23-0031	HKU31-MO1	0.0192676	/	EVQLQESGSELVRSGASVKMSCKASGYTFTSYNMHWVKQTPGQGLEWIGYIYPGNGGTTYNQKFKGKATLTTDTSSSTAYMQISSLTSEDSAVYFCARDNYGNYYFDYWGQGTTLTVSS	DILLTQSPASLAVSLGQRATISCRASESVHNYGISFMNWFQQKPGQPPKLLIYAASNQGSGVPARFSGSGSGTDFSLNIHPMEEDDTAMYFCQQSKEVPYTFGGGTKLEIK
BD23-0032	HKU31-MO1	0.137493	/	EVQLQQSGAELVRSGASVKMSCKASGYTFTSYNLHWVKQTPGQGLEWIGYIYPGNGGSNYNQKFKGKATLTADTSSSTAYMQISSLTSEDSAVYFCARDNYGNYYFDYWGQGTTLTVSS	QILLTQSPASLAVSLGQRATISCRVSESVDNYGISFMNWFQQKPGQPPKLLMYAASNQGSGVPARFSGSGSGTDFSLNIHPMEEDDTAMYFCQQSKEVPYTFGGGTKLEIK
BD23-0033	HKU31-MO1	0.0371751	/	QVQLQQSGPELVRSGASVKMSCKASGYTFTSYNMHWVKQTPGQGLEWIGYIYPGDGFTNYNQKFKGKATLTADTSSSTAYMQISSLTSEDSAVYFCARDNFGNYYFDYWGQGTTLTVSS	DIQMTQSPASLAVSLGQRATISCRASESVDNYGISFMNWFQQKPGQPPKLLIYAASNQGSGVPARFSGSGSGTDFSLNIHPMEEDDTAMYFCQQSKEVPYTFGGGTKLEIK
BD23-0035	HKU31-MO1	>5	/	QVKLQQSGAELVKPGASVKMSCKAFGYTFTTYPIEWMKQNHGKSLEWIGNFHPYNDDTKYNEKFKGKAKLTVEKSSSTVYLELSRLTSDDSAVYYCARLGYDWYFDVWGAGTTLTVSS	DVVMTQTPLTLSVTIGQPASISCKSSQSLLDSDGKTYLNWLLQRPGQSPKRLIYLVSKLDSGVPDRFTGSGSGTDFTLKISRVEAEDLGVYYCWQGTHFPWTFGGGTKLEIK
BD23-0036	HKU31-MO1	>5	/	EVQLQESGAELARPGASVKMSCKASGYTFTSYTIHWVKQRPGQGLEWIGYINPSSGYTNYNQKFKDKATLTADKSSSTAYMQLSSLTSEDSAVYYCARDYYYAMDYWGQGTSVTVSA	DILMTQSHKFMSTSVGDRVSITCKASQDVGTVVAWYQQKPGQSPKLLIYWASTRHTGVPDRFTGSGSGTDFTLTISNVQSEDLADYFCQQYSSYRTFGGGTKLEIK
BD23-0037	HKU31-MO1	>5	/	EVQLQQSAAELARPGASVKMSCKASGYTFTTYTMHWVKQRPGQGLEWIGYINPSSGYTDYNQKFKDKTTLTADISSSTAYMQLSSLTSEDSAVYYCARDHYYAMDYWGQGTSVTVSA	DVVMTQTPTTMAASPGEKITITCSASSSISSNYLHWYQQKPKFSPKLLIYRTSNLASGVPARFSGSGSGTSYSLTIGTMEAEDVATYFCQQGSTIPRTFGGGTKLEIK
BD23-0038	HKU31-MO1	0.00924955	/	EVQLQQSGAELVRSGASVKMSCKASGYTFTSYNMHWVKQTPGQGLEWIGYIYPGNGGTNYNQKFKGKATLTADTSSSTAYMQISSLTSEDSAVYFCARDNYGNYYFDYWGQGTTLTVSS	DIQMTQSPASLAVSLGQRATISCRASESVDNYGISFMNWFQQKPGQPPKLLIYAASNQGSGVPARFSGSGSGTDFSLNIHPMEEDDTAMYFCQQSKEVPYTFGGGTKLEIK
BD23-0042	HKU31-MO1	0.0107234	/	EVQLQQSVPELVKPGASVKMSCKASGYTFTSYVMHWVKQKPGQGLEWIGYINPYNDDTKYNEKFKGKATLTSDKSSSTVYMELSSLTSEDSAVYYCAREDMGNFSFDYWGQGTTLTVSS	DIQMTQSPASLAVSLGQRATISCRASESVDYYGFSFMNWFQQKPGQPPKLLIYAASNQGSGVPARFSGSGSGTDFSLNIHPMEEDDTAMYFCQQSKEVPTFGGGTKLEIK
BD23-0043	HKU31-MO1	0.0056186	/	GVKLVESGAELVRSGASVKMSCKASGYTFTSYNMHWVKQTPGQGLEWIGYIYPGSGDTNYNQKFKGKATLTADTSSSTAYMQISSLTSEDSAVYFCARDNYGNYYFDYWGQGTTLTVSS	DIQMTQSPASLAVSLGQRATISCRASESVDNYGISFMNWFQQKPGQPPKLLIYAASNQGSGVPARFSGSGSGTDFSLNIHPMEEDDTAMYFCQQSKEVPYTFGGGTKLEIK
BD23-0044	HKU31-MO1	0.719646	/	QVQLQQPGAELVRSGASVKMSCKASGYTFTSYNMHWVKQTPGQGLEWIGYIYPGNGGTNYNQKFKGKATLTADTSSSTAYMQISSLTSEDSAVYFCARDNYGNYYFDYWGQGTTLTVSS	EIVLTQSPASLTVSLGQRATISCRASESVDYSGISFMNWFQQKPGQPPKLLIYAASSQGSGVPARFSGSGSGTDFSLNIHPVEEDDTAMYFCQQRKEVPYTFGGGTKLELK
BD23-0047	HKU31-MO1	0.00606516	/	EVKLMESGAELVKPGASVKLSCTASGFNIKDTYIHWVNQRPEQGLEWIGRIDPANGNTEYDPKFQDKATITADTSSNTAYLHLSSLTSEDTAVYYCARGVPFTYWGQGTLVTVSS	GIQMTQSSSYLSVSLGGRVTITCKASDHINNWLAWYQQTPGNAPRLFISGATSLETGFPSRFSGSGSGKDYTLSITSLQTEDVATYYCQQYWNTPPTFGGGTKLELK
BD23-0048	HKU31-MO1	0.00481506	/	QVQLQQSGPELVRSGASVKMSCKASGYTFTSYNMHWVKQTPGQGLEWIGYIYPGDGGTNYNQKFRGKATLTADTSSSTAYMQISSLTSEDSAVYFCARDNYGNYYFDYWGQGTTLTVSS	EILLSQSPASLAVSLGQRATISCRASESVDNYGISFMNWFQQKPGQPPKLLIYAASNQGSGVPARFSGSGSGTDFSLNIHPMEEDDTAMYFCQQSKEVPYTFGGGTRLEIK
BD23-0050	HKU31-MO1	0.00585759	/	EFQLQQSGAEFVKPGASVKLSCTASGFNIKDTYIHWMKQRPEQGLEWIGRIDPANDNTTYDPKFQGKATITADTSSNTAYLRLSSLTSEDTAVYSCARGVPFTYWGQGTLVTVSA	DIQMTQSSSYLSVSLGGRVTITCKASDHINNWLAWYQQKPGNAPRLLISGATSLETGFPSRFSGSGSGKDYTLSITSLQTEDVGTYYCQQYWISPPTFGGGTKLEIK
BD23-0053	HKU31-MO1	0.00799436	/	EVQLQESVADLVRSGASVKMSCKASGYTFTSYNMHWVKQTPGQGLEWIGYIYPGNGGTNYNQKFKGKATFTADTSSSTAYMQISSLTSEDSAVYFCARDNSGNFYFDYWGQGTTLTVSS	DIQMIQSPASLAVSLGQRATISCRASESVDNYGFSFMNWFQQKPGQPPKLLIYAASNQGSGVPARFSGSGSGTDFSLNIHPMEEDDTAMYFCQQSKEVPYTFGGGTKLELK
BD23-0055	HKU31-MO1	0.00470043	/	EVQLQQSGAELVRSGASVKMSCKASGYTFTSYNMHWVKQTPGQGLEWIGYIYPGNGGTNYNQKFKGKATLTADTSSTTAYMQISSLTSEDSAVYFCARDNYGNYYFDYWGQGTTLTVSS	EIVLTQSPASLAVSLGQRATISCRASESVDNYGISFMNWFQQKPGQPPKLLIYAASNQGSGVPARFSGSGSGTDFSLNIHPMEEDDSAMYFCQQSKEVPYTFGGGTKLEIK
BD23-0057	HKU31-MO1	0.00949222	/	EVKLVESGAELVRSGASVKMSCKASGYTFTSYNMHWVKQTPGQGLEWIGYIYPGNGGTNYNQKFKGKATLTADTSSSTAYMQISSLTSEDSAVYFCARDNYGNYYFDYWGQGTTLTVSS	DILMTQSPASLAVSLGQRATISCRASESVDNYGFSFMNWFQQKPGQPPKLLIYAASNQGSGVPARFSGSGSGTDFSLNIHPMEEDDTAMYFCQQSKEVPYTFGGGTKLEIK
BD23-0058	HKU31-MO1	0.494697	/	EVQLQQSGAELVKPGASVKMSCKASGYTFTSYWINWVKQRPGQGLEWIGDIYPGRDISNYNEKFKSKATLTQDTSSSTAYMQLSSLTSEDSAVYYCSRGAPYGNTFYYTMDYWGQGTSVTVSS	DILITQSPAIMSASLGERVTMTCTASSSVSSSYLHWYQQKPGSSPKLWIYSTSNLASGVPARFSGSGSGTSYSLTISSMEAEDAATYYCHQYHRSPPTFGTGTRLEIK
BD23-0060	HKU31-MO1	0.0561147	/	QVQLQQSGAELVRPGASVKLSCTASGFNIKDTYMHWVKQRPEQGLEWIGRIDPTNGNTKYDPKFQGKATITADTSSNTAYVQLSSLTSEDTAVYYCARGVPFAYWGQGTLVTVSA	DIQMTQSSSYLSVSLGGRVTITCKASDHINNWLAWYQQKPGNAPRLLISGATSLETGVPSRFSGSGSGKDYTLSITSLQTEDVATYYCQHYWSTPPTFGGGTKLEIK
BD23-0063	HKU31-MO1	0.00706098	/	QPELQQSGAELVRSGASVKMSCKASGYTFTSYNIHWVKQTPGQGLEWIGYIYPGNGGTNYNQKFKGKATLTADTSSSTAYMQISSLTSEDSAVYFCARDNYGNYYFDYWGQGTTLTVSS	DILLTQSPASLAVSLGQRATISCRASESVDNYGFSFMNWFQQKPGQPPKVLIYAASNQGSGVPARFSGSGSGTDFSLNIHPMEEDDTAMYFCQQSKEVPYTFGGGTKLEIK
BD23-0064	HKU31-MO1	>5	/	QVQMKQSGPEVVKPGASVKMSCKAAGYTFTDYVISWVKQRTGQGLEWIGEIYPRSGSIYYNEKFKGKATLTADKSSNTAYMQLSSPTSEDSAVYFCARRRGYYGVYYYPLDYWGQGTSVTVSS	GIVLTQSPLSLPVSLGDQASISCRSSQSLVHSNGNTYLHWYLQKPGQSPKLLIYKVSNRFSGVPDRFSGSGSGTDFTLKISRVEAEDLGVYFCSQSTHVPFTFGSGTKLEIK
BD23-0066	HKU31-MO1	0.0407123	/	EVQLLETGSELVRSGASVKMSCKASGYTFTSYNMHWVKQTPGQGLEWIGYIYPGNGGTNYNQKFKGKATLTADTSSSTAYMQISSLTSEDSAVYFCARDNYGNYYFDYWGQGTTLTVSS	DIVMTQSPASLAVSLGQRATISCRASEIVDNYGISFMNWFQQKPGQPPKVLIYAASNQGSGVPARFSGSGSGTDFSLNIHPMEEDDTAMYFCQQSKEVPYTFGGGTKLEIK
BD23-0067	HKU31-MO1	0.00330489	/	EVQLQQSGAELVRSGASVKMSCKASGYTFTSYNMHWVKQTPGQGLEWIGYIYPGNGGTNYNQKFKGKATLTADTSSSTAYMQISSLTSEDSAVYFCARDNYGNYYFDYWGQGTTLTVSS	DIQMTQSPASLAVSLGQRATISCRASESVDYSGISFMNWFQQKPGQPPKLLIYAASNQGSGVPARFSGSGSGTDFSLNIHPMEEDDAAVYFCQQSKEVPYTFGGGTKLEIK
BD23-0068	HKU31-MO1	0.00200053	/	EVQLQESGAELVKPGASVKLSYTASDFNIKDTYMHWVKQRPEQGLEWIGRIDPANDNTKYDPKFQGKATITADTSSNTAYLQLGSLTSEDSAVYYCLRGVPFAYWGQGTLVTVSA	DIQMTQSSSYLSVSLGGRVTITCKASDHINNWLAWYQQKPGNAPRLLISGATSLETGVPSRFSGSGSGKDYTLSITSLQTEDVATYYCQQYWSTPPTFGGGTKLEIK
BD23-0069	HKU31-MO1	0.187468	/	EVQLQQSGAELVRSGASVKMSCKASGYTFTSYNMHWVKQTPGQGLEWIGYIHPGNGETNFNQKFKGKATLTADTSSRTAYMQISSLTSEDSAVYFCARDNYGNYYFDYWGQGTTLTVSS	EILLTQSPASLAVSLGQRATISCRASESVDNYGISFMNWFQQKPGQPPKLLIYAGSNQGSGVPARFSGSGSGTDFSLNIHPMEEDDTAMYFCQQSKEVPYTFGGGTKLEIK
BD23-0071	HKU31-MO1	0.00299949	/	EVKLVESGAELVRSGASVKMSCKASGYTFTSYNMHWVKQTPGQGLEWIGYIYPGNGGTNYNQKFKGKATLTADTSSSTAYMQISSLTSEDSAVYFCARDNYGNYYFDYWGQGTTLTVSS	DIQMTQSPASLAVSLGQRATISCRASESVDNYGISFMNWFQQKPGQPPKVLIYAASNQGSGVPARFSGSGSGTDFSLNIHPMEEDDTAMYFCQQSKEVPYTFGGGTKLEIK
BD23-0072	HKU31-MO1	>5	/	EVQLQQSAAELATPGASVKMSCKASGYTFTSYTMHWVKQRPGQGLEWIGYVNPSSVYTEYNQKFKDKTTLTADKSSSTAYMQLNSLTSEDSAVYYCVRDYYYGFDYWGQGTTLTVSS	NIVLTQSPSSLAVSAGEKVTMSCKSSQSVLYSSNQKNYLAWYQQKPGQSPKLLIYWASTRESGVPDRFTGSGSGTDFTLTISSVQAEDLAVYYCHQYLSSYTFGGGTKLEIK
BD23-0074	HKU31-MO1	0.0151482	/	EVQLQESGPELVKPGASVKISCKASGYTFTDNNMHWVKQSHGKSLEWIGYIYPYNGGTGYNQKFKSKATLTVDNSSSTAYMELRSLTSEDSAVYYCARSRYDGFDYWGQGTTLTVSS	DIQMTQSPASLSASVGETVTITCRASDNIYSYLAWYQQKQGKSPQLLVYNAKTLAEGVPSRFSGSGSGTQFSLKINSLQPEDFGSYYCQHHYGTPFTFGSGTKLEIK
BD23-0075	HKU31-MO1	0.00150073	/	EVQLQQSGPELVKPGASVKMSCKASGYTFTSYFMHWVKQKPGQGLEWIGYINPYNDGTKYNEKFKGKATLTSDKSSSTAYMELSSLTSEDSAVYYCAREDYGNFLMDYWGQGTSVTVSS	DIQMIQSPASLAVSLGQRATISCRASESVDYYGISFMNWFQHKPGQPPKLLIYAASNQGSGVPARFSGSGSGTDFSLNIHPVEEDDTAMYFCQQSKEVPWTFGGGTKLELK
BD23-0077	HKU31-MO1	>5	/	EVKLVQSGAELARPGASVKMSCKASGYDFTIYTIHWIKQRPGQGLEWIGYINPNSGYTNDNQKFKDKATLTADKSSSTAYMQLSSLTSEDSAVYYCARAFFYYGSTYSYAMDYWGQGTSVTVSS	ETTVTQSPLSLPVSLGDQASISCRSSQSLVHSNGNTYLHWYLQKPGQSPKLLIFKVSNRFSGVPDRFSGSGSGTDFTLKISRVEAEDLGVYFCSQSTHVPPWTFGGGTKLELK
BD23-0079	HKU31-MO1	0.00792687	/	QVQLKQSGTVLARPGASVKISCKASGYSFTTYWMHWVKQRPGQGLEWIGAIYPGNSDANYNQKFKGKAKLTAVTSASTAYMELSSLTNEDSAVYYCTREDYGNYDFDYWGQGTTLTVSS	DIQMTQSPASLAVSLGQRATISCRASESVDYYGISFMNWFQQKPGQPPKLLIYAASYQGSGVPARFSGSGSGTDFSLNIHPMEEDDTAMYFCQQSKEVPWTFGGGTKLEIK
BD23-0080	HKU31-MO1	>5	/	DVQLQESGAELARPGASVKMSCKASGYTFTSYTIHWVKQRPGQGLEWIGYINPSSDYTNYNQKFKDKATLTADTSSSTAYMQLSSLTSEDSAVYYCARDIYFGMEYWGQGTSVTVSS	DIQMTQSPSSLSASLGDTITITCHASQNINVWLSWYQQKPGNIPKLLIYKASNLHTGVPSRFSGSGSGTGFTLTISSLQPEDIATYYCQQGQSYPRTFGGGTKLEIK
BD23-0081	HKU31-MO1	0.00227892	/	EVQLQQSGAELVRSGASVKMSCKASGYTFTSYNIHWVKQTPGQGLEWIGYIYPGNGGTNYNQKFKGKATLTADTSSSTAYMQISSLTSEDSAVYFCARDNYGNFYFDYWGQGTTLTVSS	NIVLTQSPASLAVSLGQRATISCRASESVDNYGFSFMNWFQQKPGQPLKVLIYAASNQGSGVPARFSGSGSGTDFSLNIHPMEEDDTAMYFCQQSKEVPYTFGGGTKLELK
BD23-0085	HKU31-MO1	>5	/	QVQNKSGPELVKPGASVKMSCKASGYTFTNYYIHWVKQRPGQGLEWIGWIYPGDGNTKYNEKFKGKTTLTADKSSSTAYMLLSSLTSEDSAIYFCARPGYYYSMDYWGQGTSVTVSS	DIEITQSHKFMSTSVGDRANITCKASQDVSTAVAWYQQKPGQSPKLLIYWASTRHTGVPDRFTGSGSGTDYTLTISSVQAEDLALYYCQQHYSTPFTFGSGTKLEIK
BD23-0086	HKU31-MO1	0.00636051	/	EVKLQQSGAELVRSGASVKMSCKASGYTFTSYNMHWVKQTPGQGLEWIGYIYPGNGGTNYNQKFKGKATLTADTSSSTAYMQISSLTSEDSAVYFCARDNYGNFYFDYWGQGTTLTVSS	DIQMTQSPASLAVSLGQRATISCRASESVDNYGFSFMNWFQQKPGQPPKLLIYAASNQGSGVPARFRGSGSGTDFSLNIHPMEEDDTAMYFCQQSKEVPYTFGGGTKLEIK
BD23-0087	HKU31-MO1	>5	/	EVQLQESAAELARPGASVKMSCKASGYTFTTYTIHWVQQRPGQGLEWIGYINPSSGYTDYNQNFKDKTTLTADKSSSTAYMQLSSLTSEDSAVYYCARSEYFDVWGAGTTVTVSS	NIVMTQSQKFMSTSVGDRVSITCKASQNVRTAVAWYQQKPGLSPKALIYLASNRHTGVPDRFIGSGSGTDFTLTISNVQSEDLADYFCLQHWNYPYTFGGGTRLEIK
BD23-0090	HKU31-MO1	0.0119299	/	EVQLQQSGPELEKPGASVKISCKASGYSFTGYNMNWVKQSNGKSLDWIGNIDPYYGVTTYNQKFKGKATLTVDKSSSTAYMQLKSLTSEDSAVYYCARSGWEDWYFDVWGAGTTLTVSS	SIVMTQSPLSLPVSLGDQASISCRSSQSIVHSNGNTYLEWFLQKPGQSPKLLIYKVSNRFSGVPDRFSGSGSGTDFTLKISRVEAEDLGVYYCFQGSHVPRTFGGGTKLEIK
BD23-0094	HKU31-MO1	0.0274084	/	EIQLQQSGAELVKPGASVKMSCKAFGYTFTTYPIEWMKQNHGKSLEWIGNFHPYNDDTKYNEKLKGKAKLTVEKSSSTVYLELSRVTSDDSAVYYCARLGYDWYFDVWGAGTTLTVSS	DIQMTQSPASLAVSLGQRATISCRASESVDNYGISFMNWFQQKPGQPPKLLIYAASNQGSGVPARFSGSGSGTDFSLNIHPMEEDDTATYFCQQSKEVPRTFGGGTKLEIK
BD23-0095	RU15-1	/	>5	DVQLVESGGDLVKPGGSLKLSCAASGFTFSSYGMSWVRQAPDKRLEWVATISSGGGYTYYPDSVKGRFTISRDNAKTTLYLQMSSLKSEDTAMYYCASGDDYSWFAYWGQGTLVTVSS	EIVLTQSPAIMSASPGEKVTITCSASSSVSYMHWFQQKPGTSPKLWIYSTSNLASGVPARFSGSGSGTSYSLTISRMEAEDAATYYCQQRSSYPPTFGGGTKLELK
BD23-0097	RU15-1	/	0.0255107	QVQLQQSGAELVKPGASVKLSCKASGYTFTSYDINWVRQRPEQGLEWIGWIFPGDDTTKYNEKFKGKATLTTDKSSSTAYMQLSRLTSEDSAVYFCARYDYEDYYTMDYWGQGTSVTVSS	DIQMTQSPALMSASPGEKVTMTCSASSSVSYMYWYQQKPRSSPKPWIYLTSNLASGVPARFSGSGSGTSYSLTISSMEAEDAATYYCQQWSSNPYTFGGGTKLEIK
BD23-0098	RU15-1	/	>5	QVQLKQSAAELARPGASVKMSCKASGYTFTFYTMHWVKQRPGQGLEWIGYINPSSGYTDYYQKFKDKTTLTADKSSSTAYMQLSSLTSEDSAVYYCARDGNPYYFDYWGQGTTLTVSS	DIQMTQSPAILSASPGEKVTMTCRASSSVSYMHWYQQKPGSSPKPWIYATSNLALGVPARFSGSGSGTSYSLTISRVEAEDAATYYCQQWSSNSRTFGGGTKLEIK
BD23-0099	RU15-1	/	>5	EVKLVESAAELARPGASVKMSCKASGYTFTFYTMHWVKQRPGQGLEWIGYINPSSGYTDYYQKFKDKTTLTADKSSSTAYMQLSSLTSEDSAVYYCARDGNPYYFDYWGQGTTLTVSS	DIVLTQTPAILSASPGEKVTMTCRASSSVSYMHWYQQKPGSSPKPWIYATSNLALGVPARFSGSGSGTSYSLTISRVEAEDAATYYCQQWSSNSRTFGGGTKLEIK
BD23-0100	RU15-1	/	0.3208	QVQLQQSGPGLVQPSQSLSITCTVSGFSLTSYGVHWVRQSPGKGLEWLGVIWSGGNTDYNAAFISRLSISKDNSKSQVFFKMNSLQPNDTAKYYCASLYDDVSLAYWGQGTLVTVSA	DIVLTQSHKFMSTSVGDRVSITCKASQDVSTAVAWYQQKPGQSPKLLIYSASYRYTGVPDRFTGSGSGTDFTFTITSVQAEDLAVYYCQQHYSTPFTFGSGTKLEIK
BD23-0101	RU15-1	/	0.601064	EVQLQESGGGLVQPGRPMKLSCVASGFTFSDYWMNWVRQSPEKGLEWVAQIRNKPYNYETYYSDSVKGRFTISRDDSKSSVYLQMNNLRAEDMGIYYCTKGDAMDYWGQGTSVTVSS	EILMTQSPAILSVSPGERVSFSCRASQSIGTRIHWYQQRTNGSPRLLIKYASESISGIPSRFSGSGSGTDFTLSINSVESEDIADYYCQQSNSWPTTFGGGTKLEIK
BD23-0103	RU15-1	/	0.242432	EVQLQESGPGLVQPSQSLSITCTVSGFSLTSYGVHWVRQSPGKGLEWLGVIWSGGSTDYNAAFISRLSISKDNSKSQVFFKMNSLQADDTAIYYCVRWGDGYDGWYFDVWGAGTTVTVSS	DIQMTQSPAIMSASPGEKVTMTCSASSGVSYMHWYQQKSGTSPKSWIYDTSKLASGVPARFSGSGSGTSYSLTISSMEAEDAATYYCQQWSSNPWTFGGGTKLEIK
BD23-0105	RU15-1	/	1.91608	EVKLVESGGGLVQPGGSRKLSCAASGFTFSSFGMHWVRQAPEKGLEWVAYISSGSSTIYYADTVKGRFTISRDNPKNTLFLQMTSLRSEDTAMYYCARGGGYYYYYAMDYWGQGTSVTVSS	GIQMTQSPAIMSASPGEKVTMTCSASSSVSFMYWYQQKPGSSPRLLIYDTSNLASGVPVRFSGSGSGTSYSLTISRMEAEDAATYYCQQWSSYPFTFGSGTKLELK
BD23-0107	RU15-1	/	>5	EVKVVESGGGLVQPGGSRKLSCAASGFTFSSFGMHWVRQAPEKGLEWVAYISSGSSTIYYADTVKGRFTISRDNPKNTLFLQMTSLRSEDTAMYYCARGGAYYYYYAMDYWGQGTSVTVSS	DIQMTQSPVIMSASPGEKVTMTCSASSSVSFMYWHQQKPASSPTLLIYDTSNLASGVPVRFSGSGSGTSYSLTLSRMEAEDAATYYCQQWSIYPFTFGSGTRLEIK
BD23-0108	RU15-1	/	>5	QVQLQQSAAEPARPGASVKMSCKASGYTFTTYTMHWVKQRPGQGLEWIGYINPSSGYTEYNQKFKDKTTLTADKSSRTAYMQLSSLTSEDSAVYYCTRWGSSGYGYYVMDYWGQGTSVTVSS	GILMTQSHKFMSTSVGDRVSITCKASQDVGTAVAWYQQKPGQSPKLLIYWASTRHTGVPDRFAGSGSGTDFTLTISNVQSEDLADYFCQQYSNYPRTFGGGTKLEIK
BD23-0110	RU15-1	/	>5	QVQLQESGAELARPGASVKMSCKASGYTFSTYTVHWIRQRPGQGLEWIGYINPSSGYTNYNQKFKDKATLTADRSSSTAYMQLSSLTSEDSAVYYCAPYYGNPAWFPYWGQGTLVTVSS	DILLTQSPAIMSASPGEKVTISCSASSSVSYMYWYQQKPGSSPKPWIYRTSNLASGVPARFSGSGSGTSYSLTISSIEAEDAATYYCQQYHSYPRTFGGGTKLEIK
BD23-0111	RU15-1	/	0.0104906	DVQLVESAAELARPGASVKMSCEASGYTFTTYTMHWVKQRPGQGLEWIGYINPSSGYTEYNQKFKDKTTLTADKSSSTAYMQLSSLTSEDSAVYYCGRDFYYAMDYWGQGTSVTVSS	GIQMTQSPAIMSASPGEKVTMTCRASSSVSSSYLHWYQQKSGASPKLWIYSTSNLASGVPARFSGSGSGTSYSLTISSVEAEDAATYYCQQYSGYPRTFGGGTKLELK
BD23-0112	RU15-1	/	0.259855	EVQLVESGPGLVQPSQSLSITCTVSGFSLTRYGVHWVRQSPGKGLEWLGVIWSGGNTDYNAAFISRLSITKDNSKSQVFFKMNSLQANDTAIYYCASLCDHVSLAYWGQGTLVTVSA	DIVMTQSQKFMSTSVGDRVSITCKASQDVSTAVAWYQQKPGQSPKLLIYSASYRYTGVPDRFTGSGSGTDFTFTISSVQAEDLAVYYCQQHYSTPFTFGSGTKLEIK
BD23-0115	RU15-1	/	0.894339	EVLLVESGGGLVQPGRPMKLSCVASGFTFSDYWMNWVRQSPEKGLEWVAQIRNKPYNYETYYSDSVKGRFTISRDDSKSSVYLQMNNLRAEDMGIYYCTKGDAMDYWGQGTSVTVSS	EILMSQSPAILSVSPGERVSFSCRASQSIGTRIHWYQQRTNGSPRLLIKYASESISGIPSRFSGSGSGTDFTLSINSVESEDIADYYCQQSDSWPTTFGGGTKLEIK
BD23-0117	RU15-1	/	>5	EVQLQQSGAELARPGASVKMSCKASGYSFTSYTIHWVKQRPGQGLEWIGYINPSSGYTNYNQKFKDKATLTADKSSSTAYMQLRSLTSEDSAVYYCARYGYDAEDYWGQGTTLTVSS	DIQMIQSPASLAVSLGQRATISCRASESVDNYGISFMNWFQQKPGQPPKLLIYAASNQGSGVPARFSGSGSGTDFSLNIHPMEEDDTAMYFCQQSKEVPWTFGGGTKLEIK
BD23-0118	RU15-1	/	>5	QVQLQQSGAELARPGASVKMSCKASGYTFTSYTIHWVKQRPGQGLEWIGFINPSSGYTNYNQKFKDKATLTADKSSSTAYMQLSSLTSEDSAVYYCARWGEYGNVYYAMDYWGQGTSVTVSS	DIQMTQSPALMAASPGEKVTITCSVSSSISSSNLHWYQQKSETSPKPWIYGTSNLASGVPVRFSGSGSGTSYSLTISSMEAEDAATYYCQQWSGYPRTFGGGTKLEIK
BD23-0120	RU15-1	/	0.377258	QVQLQQSGAELVKPGASVKLSCKASGYTFTSYDINWVRQRPEQGLEWIGWIFPGDGSTKYNEKFKGKATLTTDKSSSTAYMQLSRLTSEDSAVYFCARYDYEDYYTMDYWGQGTSVTVSS	DIQMTQSPALMSASPGEKVTMTCSASSSVSYMYWYQQKPRSSPKPWIYLTSNLASGVPARFSGSGSGTSYSLTISSMEAEDAATYYCQQWSSNPYTFGGGTKLEIK
BD23-0124	RU15-1	/	>5	EVQLKESAAELARPGASVKMSCKASGYTFTAYTMQWIKQRPGQGLEWIGYINPSSAYTEYNQKFKDKTTLTADKSSSTAYMQLSSLTSEDSAVYYCARDFYYGMDYWGQGTSVTVSS	DIVMTQSPAIMSASPGEKVTMTCRASSSVSSSYLHWYQQKSGASPKLWIYSTSNLASGVPARFSGSGSGTSYSLTISSVEAEDAATYYCQQYSGYPRTFGGGTKLEIK
BD23-0125	RU15-1	/	0.307354	DVKLVESGGGLVQPGGSLKLSCAASGFTFSSYTMSWVRQTPEKRLEWVAYISNGGDYTYYPDTVKGRFTISRDNAKNTLYLQMSSLKSEDTAMYYCARLAVLDYWYFDVWGAGTTVTVSS	DIVLTQSPAIMSASPGEKVTMTCSASSSVSFMHWYQQKSGTSPKRWIYDTSKLASGVPTRFSGSGSGTSYSLTIRNMEAEDAATYYCQQWSSNPLTFGAGTKLEIK
BD23-0126	RU15-1	/	>5	EVQLQESAAELARPGASVKMSCKASGYTFTYYTMHWVKQRPGQGLEWIGYINPSSGYTDYNQKFKDKTTLTADKSSSTAYMQLSSLTSEDSAVYYCARLGGNYWYFDVWGAGTTVTVSS	DIEMTQSPAIMSASPGEKVTMTCRASSSVSSSYLHWYQQKSGASPKLWIYSTSNLASGVPARFSGSGSGTSYSLTISSVEAEDAATYYCQQYTGYPLTFGGGTKLEIK
BD23-0128	RU15-1	/	>5	GVQLQESGAELARPGASVKMSCKASGYTFTTYTIHWVKQRPGQGLEWIGYINPSSGYTNYNQKFKDKATLTADKSSSTAYMQLSSLTSEDSAVYYCARGEGNYVLAYWGQGTLVTVSA	ETTVTQSPAIMSASPGEKVTISCSASSSVSYMYWYQQKPGSSPKPWIYRTSNLASGVPARFSGSGSGTSYSLTISSMEAEDAATYYCQQYHSYPLTFGAGTKLEIK
BD23-0129	RU15-1	/	0.364446	EVQLQESGPELVKPGASVKMSCKASGYTFTSYVMHWVKQKPGQGLEWIGYISPYNDGTKYNEKFKGKPTLTSDKSSSTAYMELSSLTSEDSAVYYCAREGYDGYHFDYWGQGTTLTVSS	DIVLTQSPAILSASPGEKVTMTCRASSSVSYMHWYQQKPGSSPKPWVYATSNLASGVPARFSGSGSGTSYSLTISRVEAEDAATYYCQQWSSNPLTFGAGTKLEIK
BD23-0130	RU15-1	/	>5	DVQLQESGGGLVQPGGSLKISCATSGFTFTDHYMSWVRQPPGKALEWLGFIRNKVNGYTTEYSASVKGRFTISRDNSQSILYLQMNTLRAEDSATYYCARDRYYGSSPYWYFDVWGAGTTVTVSS	NIVMTQSPASLAVSLGQRATISCRASESVEYYGTSLMQWYQQKPGQPPKLLIYAASNVESGVPARFSGSGSGTDFSLNIHPVEEDDIAMYFCQQSRKVPWTFGGGTKLEIK
BD23-0134	RU15-1	/	>5	QVQLQQSAAELARPGASVKMSCKASGYTFRTYTIHWVKQRPGQGLEWIGYINPSSGYTDYNQKFKGKPTLTADKSSSTAYMQLSSLTSEDSAVYYCARSGGYYDFDYWGQGTTLTVSS	DIQMTQSPAIMSASPGEKVTMTCRASSSVSSSYLHWHQQKSGASPKLWIYSTSNLASGVPARFSGSGSGTSYSLTISSVEAEDAATYYCQQYSGYPYTFGGGTKLEIK
BD23-0135	RU15-1	/	>5	QVQLQQSAAELAGPGASVKMSCKTSGYSFTRYTMHWVKLRPGQGLEWIGYINPSSGYTEYNQKFKDKTTLTADKSSSTAYMQLSSLTSEDSAVYCCARSGIGGYDGFAYWGQGTLVTVSS	DIQMTQSPTSLAVSLGQRATISCRASESVDNYGISFMNWFQQKPGQPPKLLIYAASNQGSGVPARFSGSGSGTDFSLNIHPMEEDDTAMYFCQQSKEVPWTFGGGTKLEIK
BD23-0137	RU15-1	/	>5	QVQMKQSGAELARPGASVKMSCKASGYTFSTYTVHWLKQRPGQGLEWIGYINPSSGYTDYNQKFKDKATLTADKSSSTAYMQLSSLTSEDSAVYYCARYGTGFDVWGAGTTLTVSS	DIQMTQSPAIMSASPGEKVTISCSASSSVSYMYWYQQKPGSSPKPWIYRTSNLASGVPARFSGSGSGTSYSLTISSMEAEDAATYYCQQFHSYPRTFGGGTKLEIK
BD23-0138	RU15-1	/	>5	EVQLQESGAELARPGASVKMSCKASGYTFVSYTIHWVKQRPGQGLEWIGFINPSSAYTNYNQKFKDKATLTADKSSSTAYMQLSSLTSEDSAVYYCARTGGYDETGAYWGQGTLVTVSS	EIMMTQSPASLAVSLGQRATISCRASESVDNYGISFMNWFQQKPGQPPKLLIYAASNQGSGVPARFSGSGSGTDFSLNIHPMEEDDTAMYFCQQSKEVPWTFGGGTKLEIK
BD23-0139	RU15-1	/	0.0949572	QVQLQQSGADLARPGASVKMSCKASGYTFTSYTIHWIKQRPGQGLEWIGYINPSSDYTNYNQKFKDKATLTADKSSSTAYMQLSSLTSEDSAVYYCARYGGSSYWYFDVWGAGTTVTVSS	DIQMTQSPASLAVSLGQRATISCRASESVDNYDNSFLHWYQQKPGQPPKLLIYLASNLESGVPARFSGSGSRTDFTLTIDPVEADDAATYYCQQNNEDPRTFGGGTKLEIK
BD23-0140	RU15-1	/	>5	EVNVVESAAELARPGASVKMSCKASGYTFTTYTMHWVKQRPGQGLEWIGFINPSSRYTEYNQKFKDKTTLTADKSSSTAYMQLSSLTSEDSAVYYCARLGYDGAMDYWGQGTSVTVSS	DIQMIQSPASLAVSLGQRATISCRASESVDNYGISFMNWFQQKPGQPPKLLIYAASNQGSGVPARFSGSGSGTDFSLNIHPMEEDDTAMYFCQQSKEVPRTFGGGTKLEIK
BD23-0141	RU15-1	/	>5	EVLLVESAAELARPGASVKMSCKASGYTFTTYTMHWVKQRPGQGLEWIGYINPSSGYTEYNQKFKDKTTLTADKSSNTAYMELSSLTSEDSAVYYCARWGDYDSYYYAMDYWGQGTSVTVSS	DIQMTQSPAIMSASLGERVTMTCTASSSVSSSYLHWYQQKPGSSPKVWIYSTSNLASGVPARFSGSGSGTSYSLTISSMEAEDAATYYCHQYHRSPRTFGGGTKLEIK
BD23-0142	RU15-1	/	>5	EVQLQESGAELARPGASVKMSCKASGYTFSTYTVHWVKQRPGQGLEWIGFINPSSSYTYYNQKFNDKATLTADKSSSTAYMQLSSLTSEDSAVYYCARYAYDAEDYWGQGTTLTVSS	DIVLTQSPASLAVSLGQRATISCRASESVDNYGISFMNWFQQKPGQPPKLLIYAASNQGSGVPARFSGSGSGTDFSLNIHPMEEDDTAMYFCQHSKEVPWTFGGGTKLEIK
BD23-0144	RU15-1	/	>5	QVQLQQSGAELMKPGASVKISCKATGFTISSYWIEWVKLRPGHGLEWIGEILPGSGSTNYNEKFKGKATFTADTSSNTAYMQLSSLTSEDSAVYYCARVYYDYILYFDYWGQGTTLTVSS	DIQMTQSPASLSVSVGETVTITCRASENIYSNLAWYQQKQGKSPQLLVYAATNLTDGVPSRFSGSGSGTQYSLKINSLQSEDFGIYYCQHFWGTPLTFGAGTKLELK
BD23-0145	RU15-1	/	>5	EVKLEESVAELARPGASVKMSCKASGYTFTTYTTHWIKQRPGQGLEWIGYINPSSGYTNYNQKFNDKATLTADKSSSTAYMQLSSLTSEDSAVYYCAPYYGNPAWFPYWGQGTLVTVSS	SIVMTQTPAFMSASPGEKVTISCSASSSVTYMFWYQQKPGSSPKPWIYRTSNLASGVPARFSGSGSGTSYSLTISSMEAEDAATYYCQQYHSYPRTFGGGTKLEIK
BD23-0146	RU15-1	/	0.00747653	QVKLEQSGPELVKPGASVKMSCKASGYTFTSYIIHWVRQKPGQGLEWIGYFNPYNDGTEYNEKFKGKATLTSDKSSSTAYMELSSLTSEDSAVYFCAREGYDGFHFDYWGQGTTLTVSS	EIQMTQSPAILSASPGEKVTMTCRASSSVSYMHWYQQKPGSSPKPWIYATSNLASGVPARFSGSGSGTSYSLTISRVEAEDAASYYCQQWSSNPLTFGAGTKLELK
BD23-0147	RU15-1	/	>5	EVNLMESGPELKKPGETVKISCKASGYTFTNYGMNWVKQAPGKGLKWMGWINTYTEEPTYADDFKGRFAFSLETSASTAYLQINNLKNEDTATYFCARHSRDAMDYWGQGTSVTVSS	DIQMTQSPASLAVSLGQRATISCRASESVDSYGNSFIHWYQQKPGQPPKLLIYRASNLESGIPARFSGSGSRTDFTLTINPVEADDVATYYCQQSYEDPFTFGSGTKLEIK
BD23-0152	RU15-1	/	>5	EVKLVESGAELARPGASVKMSCKASGYTFSTYTIHWIKQRPGQGLEWIGYINPSSGYTNYNQKFKDKATLTADKSSSTAYMQLSSLTSEDSAVYYCARYGYDAEDYWGQGTTLTVSS	DIQMTQSPASLAVSLGQRATISCRASESVDNYGISFMNWFQQKPGQPPKLLIYAASNQGSGVPARFSGSGSGTDFSLNIHPMEEDDTAMYFCQQSKEVPWTFGGGTKLEIK
BD23-0153	RU15-1	/	>5	PVQLQQPGAELARPGASVKMSCKASGYSFTTYTIHWVKQRPEQGLEWIGYINPSSAYTNYNQKFKDKATLTADKSSSTAYMQLSSLTSEDSAVYYCVRYGYDAEDYWGQGTTLTVSS	DIVMTQSTASLAVSLGQRATISCRASESVDNYGISFMNWFQQKPGQPPKLLIYAASNLGSGVPARFSGSGSGTDFSLNIHPMEEDDTAMYFCQQSKEVPWTFGGGTKLEIK
BD23-0155	RU15-1	/	>5	DVQLVESGAELARPGASVKMSCKASGYTFTTYTIHWIKQRPGQGLEWIGYINPSSSYTNYNQKFRDKATLTADKSSSTAYMQLSSLTSEDSAVYYCAPYYGNPAWFPYWGQGTLVTVSA	DIQMIQSPAIMSASPGEKVTISCSASSSVSNMYWYQQKPGSSPKPWIYRTSNLASGVPARFSGSGSGTSYSLTISSMEAEDAATYYCQQYHSYPRTFGGGTKLELK
BD23-0156	RU15-1	/	>5	EVQLLETGAELARPGASVKMSCKASGYTFSTYTIHWVKQRPGQGLEWIGYINPSSGYTNYNQKFKDKATLTADKSSSTAYMQLSSLTSEDSAVYYCARWGGNYVDWYFDVWGAGTTVTVSS	DIQMTQSPAIMSASPGEKVTMTCRASSSVSSSYLHWYQQKSGASPKLWIYSTSNLASGVPARFSGSGSGTSYSLTISSVEAEDAATYYCQQYSGYPLTFGGSTKLEIK
BD23-0158	RU15-1	/	>5	EVQLQQSVAELARPGASMKMSCKASGYTFTTYTMHWVKQRPGQGLEWIGYINPSSGYTEYNQKFKDKTTLTADKSSSTAYMQLSSLTSEDSAVYYCARDFYYAMDYWGQGTSVTVSS	DIQMTQSPVIMSASPGEKVTMTCRASSSVSSSYLHWYQQKSGASPKLWIYSTSNLASGVPARFSGSGSGTSYSLTISSVEAEDAATYYCQQYSGYPRTFGGGTKLEIK
BD23-0159	RU15-1	/	0.0237667	QIQLQQSGPGLVQPSQSLSITCTVSGFSLTGYGLHWVRQSPGKGLEWLGVIWSGGNTDYNAAFISRLSITKDNSKSQVFFKMNSLQANDTAIYYCASLYDYVSLAYWGQGTLVTVSS	ETTVTQSHKFMSTSVGDRVSITCKASQDVGAAVAWYQQKPGQSPKLLIYSASYRYTGVPDRFTGSGSGTDFTFTISSVQAEDLAVYYCQQHYSTPFTFGSGTKLEIK
BD23-0160	RU15-1	/	>5	EVQLQESGAELVKPGASVKLSCTASGFKIKDTYMHWVKQRPEQGLEWIGRIDPANGNTKYDPKFQDKATITADTSSNTAYLQLSSLTSEDTAVYYCAEGDYDGWFAYWGQGTLVTVSA	DIQMIQSPKSMSMSVGERVTLSCKASENVGTYVSWYQQKPEQSPKLLIYGASNRYTGVPDRFTGSGSATDFTLTISSVQAEDLADYHCGQSYSYPYTFGGGTKLEIK
BD23-0161	RU15-1	/	>5	EVQLQQSGPELKKPGETVKISCKASGYTFTNYGMNWVKQAPGKGLKWMGWINTYTEEPTYADDFKGRFAFSLETSASTAYLQINNLKNEDTATYFCARHSRDAMDYWGQGTSVTVSS	SIVMTQTPASLAVSLGQRATISCRASESVDSYGNSFIHWYQQKPGQPPKLLIYRASNLESGIPARFSGSGSRTDFTLTINPVEADDVATYYCQQSYEDPFTFGSGTKLEIK
BD23-0162	RU15-1	/	>5	DVQLVESAAELARPGASVKMSCKASGYTFTTYTMHWVKQRPGQGLEWIGYINPSSGYTEYNQKFKDKTTLTADKFSSTAYMQLSSLTSEDSAVYYCARDFYYTMDYWGQGTSVTVSS	DIQMTQSPAIMSASPGEKVTITCSASSSVSYMHWFQQKPGTSPKLWIYSTSNLASGVPARFSGSGSGTSYSLTISRMEAEDAATYYCQQRSSYPPTFGGGTKLEIK
BD23-0163	RU15-1	/	0.0601508	EVQLKESGPGLVQPSQSLSITCTVSGFSLTSYGLHWVRQSPGKGLEWLGVIWSGGNTDYNAAFISRLSISKDNSKSQVFFKMNSLQTNDTAIYYCASLYDYVSLTYWGQGTLVTVSS	NIVMTQSHKFMSTSVGDRVSITCKASQDVGAAVAWYQQKPGQSPKLLIYSASYRYTGVPDRFTGSGSGTDFTFTISSVQAEDLAVYYCQQHYSTPFTFGSGTKLEIK
BD23-0164	RU15-1	/	>5	EVQLQESAAELARPGASVKMSCKASGFTFISYTIHWVKQRPGQGLEWIGYINPSSGYTDYNKKFKDKTTLTADKSSSTAYMQVSSLTSEDSAVYYCARDFYYAMDYWGQGTSVTVSS	SIVMTQSPAIMSASPGEKVTVTCRASSSVSSSYLHWYQQKSGASPKLWIYSTSNLASGVPARFSGSGSGTSYSLTISSVEAEDAATYYCQQYSGYPRTFGGGTKLEIK
BD23-0165	RU15-1	/	>5	EVQLQESGSELARPGASVKMSCKASGYTFSTYTIHWVKQRPGQGLEWIGYINPSSAYTNNNQKFKDKATLTADKSSSTAYMQLSSLTSEDSAVYYCARYGYDAEDYWGQGTTLTVSS	DIQMTQSPASLAVSLGQRATISCRASESVDNYGISFMNWFQQKPGQPPKLLIYAASNQGSGVPARFIGSGSGTDFSLNIHPMEEDDTAMYFCQQSKEVPWTFGGSTKLEIK
BD23-0166	RU15-1	/	>5	EVQLQESGAELARPGASVKMACKASGYTFSSYTIHWVKQRPGQGLEWIGYINPSSGYTNYNQKFKDKATLTADKSSSTAYMQLSSLTSEDSAVYYCARYGYDAEDYWGQGTTLTVSS	ETTVTQSPASLAVSLGQRATISCRASESVDNYGISFMNWFQQKPGQSPKLLIYAASKQGSGVPARFSGSGSGTDFSLNIHPMEEDDTAMYFCQQSKEVPWTFGGGTKLEIK
BD23-0167	RU15-1	/	0.321391	EVMLVESGPGLVQPSQSLSITCTVSGFSLTSYGVHWVRQSPGKGLEWLGVIWSGGNTDYNAAFISRLSISKDNSKSQVFFKMNSLQANDTAIYYCASLYDYVSLAYWGQGTLVTVSA	DIQMTQSHKFMSTSVRDRVSITCKASQDVSTAVAWYQQKPGQSPKLLIYSASYRYTGVPDRFTGSGSGTDFTFTISSVQAEDLAVYYCQQHYNTPFTFGSGTKLEIK
BD23-0168	RU15-1	/	0.262302	GVKLVESEPELVKPGASVKISCKASGYSFTGYFMNWVKQSHGKSLEWIGRINPYNGDTFYNQKFKGKATLTVDKSSSTAHMELLSLTSEDSAVYYCGRISYLYYAMDNWGQGTSVTVSS	DIQMTQSPASLAVSLGQRATISCRASESVDSYGNSFMHWYQQKPGQPPKLLIYLASNLESGVPARFSGSGSRTDFTLTIDPVEADDAATYYCQQNNEDPFTFGGGTKLEIK
BD23-0169	RU15-1	/	0.0154982	QVQLKQSGPGLVQSSQSLSITCTVSGFSLTGYGVHWVRQSPGKGLEWLGVIWSGGNTDYNAAFISRLSISKDNSKSQVFFKMNSLQANDTAIYYCASLYDYVSLAYWGQGTLVTVSS	DIQMTQSHKFMSTSVGDRVSITCKASQDVSSAVAWYQQKPGQSPKLLIYSASYRYTGVPDRFTGSGSGTDFTFTISSVQAEDLAVYYCQQHYSTPFTFGSGTKLEIK
BD23-0170	RU15-1	/	>5	EVQLQESVAELARPGASVKMSCKASGYTFSTYTIHWVKQRPGQGLEWIGYINPSSGYTNYNQKFKDKATLTADKSSSTAYMQLSSLTSEDSAVYYCARWGGNYVDWYFDVWGAGTTLTVSS	DIQMIQSPAIMSASPGEKVTMTCRASSSVSSSYLHWYQQKSGASPKLWIYSTSNLASGVPARFSGSGSGTSYSLTISSVEAEDAATYYCQQYSGYPLTFGGGTKLEIK
BD23-0172	RU15-1	/	>5	EVLLVESGPELVKPGASVKMSCKASGYTFSSYVMHWVKQKPGQGLEWIGYISPYNDGTKYNEKFKGKATLTSDKSSSTAYMELSSLTSEDSAVYYCAREGYDGFHFDYWGQGTTLTVSS	DIQMTQSPAILSASPGEKVTMTCRASSSVSYMHWYQQKPGSSPKPWIYGTSNLASGVPARFSGSGSGTSYPLTISRVEAEDAATYYCQQWSSNPLTFGAGTKLELK
BD23-0173	RU15-1	/	>5	EVQLQESGGDLVKPGGSLKLSCAASRFTFNNYGMSWVRQTPDKRLEWVATISSGGGYTYYPDSVKGRFTISRDNAKNTLYLQMSSLKSEDTAMYYCAILLHYYGTPLTAMDYWGQGTSVTVSS	DIQMTQSHKFMSTSVGDRVSITCKASQDVSTAVAWYQQKPGQSPKLLIYWASTRHTGVPDRFTGSGSGTDYTLTISSVQAEDLALYYCQQHSIPYTFGGGTKLEIK
BD23-0174	RU15-1	/	>5	EVQLQQSGADLARPGASVKMSCKASGYTFTTYTIHWLKQRPGQGLEWIGYINPSSGYTNYNQKFKDKATLTADKSSSTAYMQLSSLTSEDSAVYYCTRYYRYDGPFAYWGQGTLVTVSS	DIVLSQSPSSLAVSVGEKVTMSCKSSQSLLYSTNQKNYLAWYQQKPGQSPKLLIYWASTRESGVPDRFTGSGSGTDFTLTISSVKAEDLAVYYCQQYYSYPWTFGGGTKLEIK
BD23-0175	RU15-1	/	>5	QVQLQQSGAELARPGASVKMSCKASGYTFSTYTIHWIKQRPGQGLEWIGYINPSSGYTNYNQKFKDKATLTADKSSSTAYMQLSSLTSEDSAVYYCAPYYGNPAWFPYWGQGTLVTVSS	GIVMTQSPAIMSASPGEKVTISCSASSSVSYMYWYQQKPGSSPKPWIYRTSNLASGVPARFSGSGSGTSYSLTISSMEAEDAATYYCQQYHSYPRTFGGGTKLEIK
BD23-0176	RU15-1	/	0.687806	EVQLVESGGGFLQPGGSRKLSCAASGFTFSSFGMHWVRQAPEKGLEWVAYISSGSSTIYYADTVKGRFTISRDNPKNTLFLQMTSLRSEDTAMYYCARGGSYYYYYAVDYWGQGTSVTVSS	DIQMTQSPAIMSASPGEKVTMTCSASSNVNYIYWYQQKPGSSPRLLIYDTSNLASGVPVRFSGSGSGTSYSLTISRMEAEDAATYFCQQWSSYPFTFGSGTKLEIK
BD23-0177	RU15-1	/	0.0535462	EVQLLETGPGLVQPSQSLSITCTVSGFSLTSYGVHWVRQSPGKGLDWLGVIWSGGNTDYNAAFISRLSISKDNSKSQVFFKMNSLQPNDTAIYYCASVYDYVSLAYWGQGTLVTVSS	SIVMTQSHKFMSTSVGDRVSITCKASQDVGTAVAWYQQKPGQSPKLLIFSASYRSTGVPDRFTGSGSGTDFTFTISSLQAEDLAVYYCQQHYSIPFTFGSGTKLEIK
BD23-0178	RU15-1	/	1.09531	EVQLVESGGGLVKPGGSLKLSCAASGFTFSDYYMYWVRQTPEKRLEWVATISDGGSYTYYPDSVNGRFTISRDNAKNNLYLQMSSLKSEDTAIYYCARDGNYGSSYWFFDVWGAGTTVTVSS	DIQMTQSPASLAVSLGQRATISCRASQSVSTSSYSYMHWYQQKPGQPPKLLIKFASNLESGVPARFSGSGSGTDFTLNIHPVEGEDAATYYCQHSWEIPTFGGGTKLEIK
BD23-0180	RU15-1	/	>5	EVQLQESAAELARPGASVKMSCKTSGYTFTTYTMHWVKQRPGQGLEWIGFINPSSGYTEYNQKFNDKTTLTADKSSSTAYMQLSSLTSEDSAVYYCARDFYYAMDYWGQGTSVTVSS	DIQMTQSPAIMSASPGEKVTMTCRASSSVSSSYLHWYQQKSGASPKLWIYSTSNLASGVPARFSGSGSGTSYSLTISSVEAEDAATYYCQQYSGYPRTFGGGTKLEIK
BD23-0181	RU15-1	/	>5	EVQLKESGAELVKPGASVKLSCKASGYTFTSYDINWVRQRPEQGLQWIGWILPGDGSTKYNEYFKGKATLTTDKSSSTAYMQLSRLTSEDSAVYFCARYDDEDYYTMDYWGQGTSVTVSS	DIVMTQSPALMSASPGEKVTMTCSASSSVSYMYWYQQKPRSSPKPWIYLTSNLASGVPARFSGSGSGTSYSLTISSMEAEDAATYYCQQWSSNPYTFGGGTKLEIK
BD23-0183	RU15-1	/	>5	EVQLLETGAELARPGASVKMSCKASGYTFTTYTIHWIKQRPGQGLEWIGYINPSSGYTNYNQKFKDKAALTADKSSSTAYMQLNSLTSEDSAVYYCAPYYGNPAWFPYWGQGTLVTVSS	DIQMTQSPAIMSASPGEKVTISCSASSSVSYMYWYQQKPGSSPKPWIYRTSNLASGVPARFSGSGSGTSYFLTISSMEAEDAATYYCQQYHSYPRTFGGGTKLEIK
BD23-0184	RU15-1	/	>5	DVQLVESAAELARPGASVKMSCKASGYTFTTYTMHWVKQRPGQGLEWIGYINPSSGYTAYNQKFKDKTTLTADKSSSTAYMQLSSLTSEDSAVYYCARSGIGGYDGFAYWGQGTLVTVSA	DIVLTQSPASLAVSLGQRATISCRASESVDNYGISFMNWFQQKPGQPPKLLIYAASNQGSGVPARFSGSGSGTDFSLNIHPMEEDDTAMYFCQQSKEVPWTFGGGTKLEIK
BD23-0185	RU15-1	/	>5	EVQLQESGGDLVKPGGSLKLSCAASGFTFSSYGMSWVRQTPDKRLDWVATISSGGGYTYYPDSVKGRFTISRDTAKNTLYLQMSSLKSEDTAMYYCASGDDYSWFAYWGQGTLVTVSS	EIVLTQSPAIMSASPGGEVTITCSASSSVSYMHWFQQKPGTSPKLWIYSTSNLASGVPARFSGSGSGTSYSLTISRMEAEDAATYYCQQRSSFPPTFGGGTKLEIK
BD23-0186	RU15-1	/	>5	EVQLQQSGAELARPGASVKMSCKTSGYTFTTYTIHWIKQRPGQGLEWIGYINPSSDYTNYNQKFKDKATLTADKSSSTAYMQLSSLTSEDSAVYYCAPYYGNPAWFPYWGQGTLVTVSS	DVFMTQTPAIMSASPGEKVTISCSASSSVSYMYWYQQKPGSSPKPWIYRTSNLASGVPARFSGSGSGTSYSLTISSMEAEDAATYYCQQYHSYPRTFGDGTRLEIK
BD23-0187	RU15-1	/	>5	QVQLQQSGAELVRPRASVKMSCKASGYTFTAYWMHWVKQRPGQGLDWIGTIDPSDSYTSYNQKFKGKATLTVDTSSSTAYMQLSSLTSEDSAVYYCLVLGSMDYWGQGTSVTVSS	QIVLSQSPAIMSASPGEKVTMTCSASSSVSYMHWYQQKSGTSPKRWIYDTSKLASGVPSRFSGSGSGTSYSLTISSMEAEDAATYYCQQWSSDPLTFGAGTKLEIK
BD23-0188	RU15-1	/	>5	EVQLVESAAELARPGASVKMSCKASGYTFTTYTMHWVKQRPGQGLEWIGYINPSSGYTESNQKFKDKTTLTADKSSSTAYMQLRSLTPEDSAVYYCARLGYDGAMDYWGQGTSVTVSS	DIVMTQSPASLAVSLGQRATISCRASESVDNYGISFMNWFQQKPGQPPKLLIYAASNQGSGVPARFSGSGSGTDFSLNIHPMEEDDTAMYFCQQSKEVPRTFGGGTKLEIK
BD24-0095	E.amu APN	>5	/	EVQLQQSGPELKKPGETVKISCKASGYTFTDYSMHWVKQAPGKGLKWMGWINTETGEPTYADDFKGRFAFSLETSAITAYLQINNLKNEDTATYFCAPYGPTGDYYAMDYWGQGTSVTVSS	DILLTQSPASLAVSLGQRATISCRASESVEYYGTSLMQWYQQKPGQPPKLLIYAASNVESGVPARFSGSGSGTDFSLNIHPVEEDDIAMYFCQQSRKVPYTFGGGTKLEIK
BD24-0096	E.amu APN	>5	/	EVLLQQSGPELKKPGETVKISCKASGYTFTDYSMHWVRQAPGKGLKWMGWINTETGEPTYADDFKGRFAFSLETSASTAYLQINNLKNEDTATYFCARWATSGYGGVDYWGQGTTLTVSS	QIVLTQSPASLAVSLGQRATISCRASESVEYYGTSLMQWYQQKPGQPPKLLIYAASNVESGVPARFSGSGSGTDFSLNIHPVEEDDIAMYFCQQSWKVPYTFGGGTKLEIK
BD24-0097	E.amu APN	0.014378	/	EVQLQQSGAELARPGASVKLSCKASGYTFTDYYINWMKQRTGQGLEWIGQIYPGNGNTYYNEKFKGKATLTADKSSSTAYMQLSRLTSEDSAVYFCARRNYAMDYWGQGTSVTVSS	GIVLTQSPASLSASVGETVTITCRASENIYSYLAWYQQKQGKSPQLLVYNGKTLAEGVPSRFSGSGSGTQFSLKINSLQPEDFGTYYCQHHYGRMFTFGAGTKLELK
BD24-0098	E.amu APN	>5	/	QVQLKESGAELMKPGASVKISCKATGYTFSTYWIEWVKQRPGHGLEWIGEILPGSGSTNYNEKFKGKATFTADTSSNTGYMQLSSLTSEDSAVYYCTRGYYGSYYAMDYWGQGTSVTVSS	DIVMTQSTSSLSASLGDRVTISCSASQGINNYLNWYQQKPDGTVKLLIYYTSSLHSGVPSRFSGSGSGTDYSLTISNLEPEDIATYYCQQYSKLPYTFGGGTKLEIK
BD24-0100	E.amu APN	>5	/	QVQNKSGPGLVAPSQSLSITCTVSGFSLTDYGVSWIRQPPGKGLEWLGVIWGDGSTYYNSALRSRLSISKDNSKSQVFLKMNSLQTDDTAMYYCAKQVDGYYWYFDVWGAGTAVTVSS	ETTVTQSPSYLAASPGETITINCRASKSISKYLAWYQEKPGKTNKLLIHSGPTLQSGIPSRFSGSGSGTDFTLTISSLEPEDFATYYCQQYNEYPWTFGGGTKLEIK
BD24-0101	E.amu APN	>5	/	EVQLQQSGPGLVAPSQSLSITCTVSGFSLTDYGVSWIRQPPGKGLEWLGVIWGAGSTYYNSALRSRLSITKDNSKSQVFLKMNSLQTDDTAMYYCAKQVDGYYWYFDVWGAGTTVTVSS	ETTVTQSPSSMSASLGDRITITCQATQDIVKILNWYQQKPGKPPSFLIYYATELAEGVPSRFSGSGSGSDYSLTISNLESEDFADYYCLQFYEFPWTFGGGTKLELK
BD24-0102	E.amu APN	0.0441795	/	EVQLQQSGPELVKPGASVRISCKASGYTFTSYYIHWVKQRPGQGLEWIGLIFPGNGNTKYNDTFKGKATLTADKSSTTVHMQFSSLTSEDSAVYFCARRNYGSGFDSWGQGTTLTVSS	DIQMTQSPASLSASVGETVTITCRASENIYSFLAWYQQKQGKSPQLLVYNAKALAEGVPSRFSGSGSGTQFSLKINNLQPVDFGSYYCQHHYGTPPTFGGGTKLEIK
BD24-0104	E.amu APN	0.0248656	/	EVQLQESGGGLVKPGGSLKLSCAASGFTFSSYTMSWVRQTPEKRLEWVATISSGGTYTYYPDSVKGRFTISRDNAKNTLYLQMSSLKSEDTAMYYCTRDGGASTMITTDEFAYWGQGTLVTVSS	EIVMTQSPATLSVTPGDSVSLSCRASQSISNNLHWYQRKAHESPKLLIKYASQSISGIPSRFSGSGSGTDFTLSINSVETEDFGMYFCQQSNSWPQTFGGGTKLEIK
BD24-0107	E.amu APN	0.0950947	/	EVLLQESGPELMKPGASVKISCKASGYTFTDYYINWVKQKPGQGLEWIGWIYPGSGNIQYNEKFKGKATLTVDTSSSTAYMQLSSLTSEDTAVYFCGRRNWALDYWGQGTTLTVSS	DIQMTQSPASLSASVGETVTITCRASENIYSYLAWYQEKQGKSPQLLVYNAKTLAEGVPSRFSGSGSGTQFSLKINNLQPEDFGSYYCQHHYGTPRTFGGGTKLEIK
BD24-0108	E.amu APN	>5	/	QVQNKSGPGLVAPSQSLAITCTVSGFSLTDHGVSWIRQPPGKGLEWLGIIWGGGSTYYNSALKSRLSISKDNSKSQLFLKMNSLQTDDTAMYYCAKHAGYDWFFDVWGAGTTLTVSS	DILLSQSPSSLSASLGDTITITCHASQNINVWLNWYQQKPGNIPKLLIYKASNLHTGVPSRFSGGGSGTGFTLTISSLQPEDIATYYCQQGQSYPLTFGAGTKLEIK
BD24-0109	E.amu APN	>5	/	EVQLLETGPGLVAPSQSLSITCTVSGFSLTGYGVNWVRQPPGKGLEWLAMIWGDGNTDYNSALKSRLSISKDNSKSQVFLKMNSLQTDDTARYFCARGAKWAFTYWGQGTLVTVSS	DIQMTQSPSSLAVSAGEKVTMSCKSSQSLLNSRTRENYLAWYQQKPGQSPKLLIYWASTRESGVPDRFTGSGSGTDFTLTISSVQAEDLAVYYCKQSYNLFTFGSGTKLEIK
BD24-0110	E.amu APN	0.0140874	/	EVKLVESGAELAKPGASVKMSCKASGYTFSSYWMHWVKQRPGQGLEWIGFINPSTGYTEYNQKFKDKATLTADKSSSTAYMHLSSLTSEDSAVYYCARSTMITRAWFAYWGQGTLVTVSA	DIVMTQSPASLSASVGETVTITCGASENIYGALNWYQRKQGKSPQLLIYGATNLANGMSSRFSGSGSGRQYSLKISSLHPDDVATYYCQNVLSSPYTFGGGTKLEIK
BD24-0111	E.amu APN	>5	/	EVQLEESGPELKKPGETVKISCKASGYTFTDYSMHWVKQAPGKGLKWMGWINTETGEPTYADDFKGRFAFSLETSASTAHLQINNLKNEDAATYLCAVYYDYGYYAMDYWGQGTSVTVSS	DIQMTQTPASLAVSLGQRATISCRASESVEYYGTSLMQWYQQKPGQPPKLLIYAASNVESGVPARFSGSGSGTDFSLNIHPVEEDDIAMYFCQQSRKVPYTFGGGTKLEIK
BD24-0113	E.amu APN	>5	/	EVQLQESGAELVRSGASVKMSCKASGYTFTSYNMHWVKQTPGQGLEWIGYIYPGNGGTNYNQKFKGKATLTADTSSSTAYMQISSLTSEDSAVYFCARDGNYWYYFDYWGQGTTLTVSS	DIQMTQSPSYLAASPGETITINCRASKSISKYLAWYQEKPGKTNKLLIYSGSTLQSGIPSRFSGSGSGTDFTLTISSLEPEDFAMYYCQQHNEYPYTFGGGTKLEIK
BD24-0114	E.amu APN	>5	/	EVMLVETGAELMKPGASVKISCKATGYTFSTYWIEWVKQRPGHGLEWIGEILPGSGSTNYNEKFKGKATFTADTSSNTAYMQLSSLTSEDSAVYYCARGYYGISYAMDYWGQGTSVTVSS	DIQMTQTTSSLSASLEDRVTISCSASQGISNYLNWYQQKPDGTVKLLIYYTSSLHSGVPSRFSGSGSGTDYSLTISNLEPEDIATYYCQQYSKLPYTFGGGTKLEIK
BD24-0115	E.amu APN	0.820608	/	EVQLLETGGDLVKPGGSLKLSCAASGFTFSSYTMSWVRQTPEKRLEWVAIMSSGGSFTYYLASVKGRFTISRDNAKNTLYLQMSSLKSEDTAMYYCTRDGEGTMITTTGFAYWGQGTLVTVSA	SIVMTQSTSSMYASLGERVTITCKASQDINGYLSWFQQKSGKSPKTLIYRANRLVDGVPSRFSGSGSGQDYSLTISSLEYEDMVIYYCLQFDEFPLTFGAGTKLELK
BD24-0116	E.amu APN	0.0163423	/	EVQLLETGGGLVKPGGSLKLSCAASGFTFSSYTMSWVRQTPEKRLEWVAPISSGGSFTYYLDSVKGRFTISRDNAKNTLYLQMNSLKSEDTAMYYCTRDGEGTMITTTGFAYWGQGTLVTVSS	SIVMTQTPSSMYASLGERVTITCKASQDIKSYLSWFQQKPGKSPKTLIYRANRLVDGVPSRFSGSGSGQDYSLTISSLEYEDMGIYYCLQYDEFPLTFGAGTRLEIK
BD24-0117	E.amu APN	0.036906	/	QVQLQQPGPELVKPGASVKISCKASGYSFTSYYINWVKQRPGQGLEWIGWIFPVNNNANYNEKFKGKATLTADTSSSTAYMQLSSLTSEDSAVYFCARRNYAMDYWGQGTSVTVSS	EIQMTQSPDSLSASVGETVTITCRASENIYSYLGWYQQKQGKSPQLLVYNAKTLAEGVPSRFSGSESGTQFSLKITSLQPEDFGTYYCQHHYGFPLTFGAGTKLEIK
BD24-0118	E.amu APN	0.033854	/	EVNLVESGGGLVKPGGSLKLSCAASGFTFSGYTMSWVRQTPEKRLEWVAIISSGGSFTYYPDSVKGRFTISRDNAKNTLYLQMSSLKSEDTAMYYCTRDGEGTMITMTGFAYWGQGTLVTVSS	DIQMTQSPSSMYASLGERVTIICKASQDIKSYLSWFQQKPGKSPKTLIYRANRMVDGVPSRFSGSGSGQDYFLTISSLEYEDMGIYYCLQYDEFPLTFGAGTKLEIK
BD24-0119	E.amu APN	0.106088	/	EVKLVESGGDLVKPGGSLKLSCAASGFTFSNSGMSWVRQTPDKRLEWVATISSGGTYTFYPDNVKGRFTISRDNANNTLYLQMSSLKSEDTAMYYCVRGGNYDYWGQGTTLTVSS	DIQMIQSPPSLAVSLGQRATISCRASESVDNYGISFMNWFQQKPGQPPKLLIYAASNQGSGVPARFSGSGSGTDFSLNIHPMEEDDTAMYFCQQNKEIPWTFGGGTKLEIK
BD24-0120	E.amu APN	0.383079	/	QVQLQESGGDLVKPGGSLKLSCAASGFTFSNYGMSWVRQTPDKRLEWVASICSGGTYTYYPDSVKGRFTISRDNAKNTLYLQMSSLKSEDTAMYYCARGGNYDYWGQGTTLTVSS	DVVVTQTPASLAVSLGQRATISCRASESVDNYGISFMNWFQQKPGQPPKLLIYAASNQGSGVPARFSGSGSGTDFSLNIHPMEEDDAAMYFCQQSKEVPWTFGGGTKLEIK
BD24-0121	E.amu APN	0.0257908	/	EVQLLETGAELAKPGASVKMSCNTSGYIFTSYWMHWVKQRPGQGLEWIGYINPSTGYTENNQRFKDKATLTADKSSRTAYMQLTSLTSEDSAVYYCARSRKELRCYFDYWGQGTTLTVSS	SIVMTQTPASLSASVGETVTITCGASENIYGALNWYQRKQGKSPQLLIYGATNLADGMSSRFSGSGSGRQYSLKISSLHPDDVATYYCQNVLSSPLTFGAGTKLEIK
BD24-0123	E.amu APN	0.0666194	/	QVKLVESGGGLVKPGGSLKLSCAASGFTFSTYAMSWVRQTPEKRLEWVATISSGGTYTYYPDSVKGRFTISRDNAKNTLYLQMSSLRSEDTAMYYCARGGNWDYWGQGTTLTVSS	GILMTQSPASLAVSLGQRATISCRASESVDNYGISFMNWFQQKPGQPPKLLIYAASNQGSGVPARFSGSGSGTDFRLNIHPMEEDDTAMYFCQQSKEVPWTFGGGTKLEIK
BD24-0124	E.amu APN	>5	/	EVLLQQSGPELVKPGASVKMSCKASGYTFTSYVMHWVKQKPGQGLEWIGYINPYNDGTKYNEKFKGKATLTSDKSSSTAYMELTSLTSEDSAVYYCARSGGTYSYSYWYFDVWGAGTTVTVSS	EIMMTQSPATLSVTPGDSVSLSCRASQSITNNLHWYQQKSHESPRLLIKYASQSISGIPSRFSGSGSGTDFTLSINSVKTEDFGMYFCQESKSWPQYTFGGGTRLEIK
BD24-0125	E.amu APN	>5	/	EVNFEESGPGLVKPSQSLSLTCTVTGYSITSDYAWNWIRQFPGNKLEWMGYISYSGSTSYNPSLKSRISITRDTSKNQFFLQLNSVTTEDTATYYCARGRYGGSYAMDYWGQGTSVTVSS	DIQMTQTTSSLSASLGDRVTISCSASQGISNYLNWYQQKPDGTVKLLIYYTSSLHSGVPSRFSGSGSGTDYSLTISNLEPEDIATYYCQQYSKLPYTFGGGTKLEIK
BD24-0126	E.amu APN	0.200127	/	EVQLLETGGGLVKPGGSLKVSCAASGFTFSSYAMSWVRQTPEKRLEWVATISIGGTYTYYVDSVKGRFTISRDSAKNTLYLQMSSLRSEDTAMYYCVRGGNWDYWGQGTTLTVSS	DIQMTQSPASLAVSLGQRATISCRASESVDNYGISFMNWFQQKPGQPPKLLIYAASNQGSGVPARFSGSGSGTDFSLNIHPMEEDDTAMYFCQQSKEVPWTFGEGTKLEIK
BD24-0127	E.amu APN	0.484895	/	EVQLQESGGGLVKPGGSLKLSCAASGFTFSGYAMSWVRQTPERRLEWVATISSAGTYTYFPDSVKGRFTISRDNARNTLYLEMSSLRSEDTAMYYCARRGLSPMITTDAMDYWGQGTSVTVSS	SIVMTQSPAILSVSPGERVSFSCRASQSIGTIIHWYQQRTNGSPRLLIKYASESISGIPSRFSGSGSGTDFTLTINSVESEDIADYYCQQSNSWPLTFGAGTRLEIK
BD24-0128	E.amu APN	0.23509	/	EVQLQESGGGLVKPGGSLKLSCAASGFTFSSYAMSWVRQTPEKRLEWVATISSGGTYTYYPDSVKGRFTISRDNAKNTLYLQMSSLRSEDTAMYYCSRQGGTSTMITTDAMDYWGQGTSVTVSS	EIVLTQSPAILSVSPGERVSFSCRASQSIGTSIHWYQQRTNGSPRLLIKYASESISGIPSRFSGSGSGTDFTLSINSVESEDIADYFCQQSNSWPLTFGAGTKLEIK
BD24-0129	E.amu APN	0.0384311	/	EVQLQQSGSELVKPGASVKISCKASGYSFTDYIMLWVKQSHGKSLEWIGNINPYHGSTSYNLKFKGKATLTVDKSSSTAYMQLNSLTSEDSAVYYCARRNYAMDYWGQGTTLTVSS	DIQMTQSPASLSASVGETVTITCRASENIYSYLAWYQQKQGKSPQLLVYNAKTLAEGVPSRFSGSEAGTQFSLKINNLQPEDFGTYYCQHHYGTPPTFGGGTKLEIK
BD24-0130	E.amu APN	>5	/	EVQLQQSGAELMKPGASVKISCKATGYTFSTYWIEWVKQRPGHGLEWIGEILPGSGSNNYSEKFKGKATFAADPSSNTAYMQLSSLTSEDSAVYYCARGYYGSSYYFDYWGQGTTLTVSS	DIQMTQTTSSLSASLGDRVTISCSASQDINNYLNWYQQKPDGTIKLLIYYTSSLHSGVPSRFSGSGSGTEYSLTISNLEPEDIATYYCQQYSKFPRTFGGGTKLEIK
BD24-0131	E.amu APN	>5	/	EVQLQESGPGLVKPSQSLSLTCTVTGYSITSDYAWNWIRQFPGNKLEWMGYISYSDSTSYNPSLKSRISITRDTSKNQFFLQLNSVTTEDTATYYCARGRYGGSYAMDYWGQGTSVTVSS	DIQMTQTTSSLSASLGDRVTISCSASQGISNYLNWYQQKPDGTVKLLIYYTSSLHSGVPSRFSGSGSGTDYSLTISNLEPEDIATYYCQQYSKLPYTFGGGTKLELK
BD24-0132	E.amu APN	0.0868217	/	EVLLVESGPGLVAPSQSLSITCTISGFSLSDYGVSWIRQAPGKGLEWLGVIWGYGSTYYNSALRSRLNISKDNSKSQVCLKMTSLQTDDTAMYYCAKHCDGYFWYFDVWGAGTTVTVSS	DIVMTQSPSYLAASPGETITINCRASKSISKYLAWYQEKPGKTNKLLIYSGSTLQSGIPSRFSGSGSGTDFTLTISSLEPEDFAMYYCQQYTEYPWTFGGGTKLEIK
BD24-0133	E.amu APN	1.64423	/	EVKLEESGAELVRPGSSVKISCKASGYAFSTYWMNWVKQRPGQGLEWIGQIYPGDGDTYYNGKFKGKATLTADKSSSTAYMQLSSLTSEDSAVYFCARPPNWDKGYYYAMDYWGQGTSVTVSS	DILLTQSPAIMSASLGEKVTMSCRASSSVNYMYWYQQKSDASPKLWIYYTSTLAPGVPARFSGSGSGNSYSLTISSMEGEDAATYYCQQFTSSPSTFGAGTKLEIK
BD24-0134	E.amu APN	0.00566344	/	EVKLVESGGDLVKPGGSLKLSCTASGFTFSSYDMSWVRQTPDKRLEWVATISSGGTYTYYPDSVKGRFTISRDNAKNTLYLQMNSLKSEDTAMYYCTRGGNYDYWGQGTTLTVSA	DIQMTQSPASLTVSLGQRATISCRASESVDNYGFSFMNWFQQKPGQPPKLLIYAASNQGSGVPARFSGSGSGTDFSLNIHPMEEDDTAMYFCQQIKEVPWTFGGGTKLEIK
BD24-0135	E.amu APN	0.579807	/	QVQLQQSGAELAQPGASVKMSCKTSGYSFTSYWIHWVKQRPGQGLEWIGYINPNSGYNEDSQKFKDKATLTADKSSNTAYMQLRSLTSEDSAVYYCARGNYYGSRTGGYFDHWGQGTTLTVSS	DIQMTQTTSSLSASLGDRVTISCSASQDISNYLNWYQQKPDGTVRLLIYFTSSLYSGVPSRFSGSGSGTDYSLTIDNLEPEDIATYNCQQYSKLPPTFGGGTKLEIK
BD24-0136	E.amu APN	>5	/	QVQNKSGPGLVAPSQSLSITCTVSGFSLSDYGVSWIRQPPGKGLEWLGVIWGYGSTYYNSALRSRLNISKDNSKSQVCLKMTSLQTDDTAMYYCAKHCDGYFWYFDVWGAGTTVTVSS	GIQMTQSPSYLAASPGETITINCRASKSISKYLAWYQEKPGKTNKLLIYSGSTLQSGIPSRFSGSGSGTDFTLTISSLEPEDFAMYYCQQYTEYPWTFGGGTKLEIK
BD24-0137	E.amu APN	>5	/	EVQLQESGPVLKKPGETVKISCKASGYTFTDFSMHWVKQAPGMGLKWMGWINTETGEPTYADDFKGRFAFSLETSASTAYFQINNLKNEDTATYFCAVYYDYGFYAMDYWGQGTSVTVSS	DIQMIQSPASLAVSLGQRATISCRASDSVEYYGTSLMQWYQQKPGQPPKLLIYAASNVESGVPARFSGSGSGTDFSLNIHPVEEDDIAMYFCQQSRKVPYTFGGGTKLEIK
BD24-0139	E.amu APN	0.447768	/	DVKLVESRGGLVKPGGSLKLSCAASGFAFSSYDMSWVRQTPEKRLEWVAYISSGGGSTYYPDTVKGRFTISRDNAKNTLYLQMSSLKSEDTAMYYCARHSGSTVITTGFAYWGQGTLVTVSS	DIQMTQSPAIMSASLGEEITLTCSASSSVSYMCWFQQKSGTSPKLLIYSTSNLASGVPSRFSGSGSGTFYSLTISNVEAEDAADYYCHQWSRYPWTFGGGTKLEIK
BD24-0141	E.amu APN	0.0233701	/	EVQLQQSGPGPVAPSQSLSITCTVSGFSLTSHGVSWVRQPPGKGLEWLGVIWGDGSTNYHSALISRLSISKDNSKSQVFLKLNSLQTDDTATYYCAKRGSSGYGFAYWGQGTLVTVSS	EIVLTQSPSSLTVTAGEKVTMSCKSSQSLLNSGNQKNYLTWYQQKPGQPPKLLIFWASTRESGVPDRFTGSGSGTDFTLTISSVQAEDLAVYYCQNDYTYPYTFGGGTKLEIK
BD24-0142	E.amu APN	0.0291951	/	EVQLQESGGDLVKPGGSLKLSCTASGFTFSSYDMSWVRQTPDKRLEWVATISSGGTYTYYPDSVKGRFTISRDNAKNTLYLQMNSLKSEDTAMYYCTRGGNYDYWGQGTTLTVSS	DIQMTQSPASLTVSLGQRATISCRASESVDNYGFSFMNWFQQKPGQPPKLLIYAASNQGSGVPARFSGSGSGTDFSLNIHPMEEDDTAMYFCQQIKEVPWTFGGGTKLEIK
BD24-0143	E.amu APN	>5	/	GVKLVESGPELKKPGETVKISCKASGYTFTDYSMHWVRQAPGKGLKWMGWINTETGEPSYADDLKGRFAFSLETSASTAYLQINNLKNEDTTTYFCARWATSGYGGVDYWGQGTTLTVSS	DIVLTQSPASLAVSLGQRATISCRASESVEYYGTSLMQWYQQKLGQPPKLLIYAASNVESGVPARFSGSGSGTDFSLNIHPVEEDDIAMYFCQQSRKVPYTFGGGTKLEIK
BD24-0144	E.amu APN	>5	/	QVQNKSGPELMKPGASVKISCKATGYTFSSYWIEWVKQRPGHGLEWIGEILPGSGSTNYNEKFKGKATFTADTSSNRANMQLSSLTSEDSAVYYCARGYYGYYYAMDYWGQGTSVTVSS	DIQMTQTTSSLSASLGDRVTISCSASQGISNYLNWYQQKPDGTVKLLIYYTSSLHSGVPSRFSGSGSGTDYSFTISNLEPEDIATYYCQQYSKLPRTFGGGTKLEIK
BD24-0145	E.amu APN	0.0201638	/	EVQLQESGGGLVKPGGSLKLSCAASGFTFSTYAMSWVRQTPEKRLEWVATISSGGTYTYYPDSVKGRFTISRDNAKNTLYLQMSSLRSEDTAIYYCVRGGNWDYWGQGTTLTVSS	DIQMTQSPAFLAVSLGQRATISCRASESVDNYGFSFMNWFQQKPGQPPKLLIYAASNQGSGVPARFSGSGSGTDFSLNIHPMEEDDTAMYFCQQSKEVPWTFGGGTKLEIK
BD24-0146	E.amu APN	0.512904	/	EVKLVESGPELEKPGASVKISCKASGYSFIGYNMNWVKQSNGKSLEWIGNINPYYGDTNYNQKFKGKATLTVDKSSSTAYMQLKSLTSEDSAVYYCARGGYDGAPFAYWGQGTLVTVSS	DIQMTQSPAIMSASLGEKVTMSCRASSSVNYMYWYQQKSDASPKLWIYYTSNLAPGVPARFSGSGSGNSYSLTISSMEGEDAATYYCQQFTSSPYMYTFGGGTKLEIK
BD24-0147	E.amu APN	>5	/	DVQLQESGFELVKPGASVKISCKASGYSFTDYTILWVKQSHGKSLEWIGNINPYYGTTNYNLKFKGKATLTVDKSSTTASIQLNSLTSEDSAVYYCARSTYYGNYPMDYWGQGTSVTVSS	DIQMTQSPASLAVSLGQRATISCRASKSVSTSGYSFMHWYQQKLGQPPKLLIYLASNLESGVPARFSGSGSGTDFTLNIHPVEEEDVATYYCQRSGEFPWTFGGGTKLELK
BD24-0148	E.amu APN	>5	/	EVQLQESGPGLVKPSQSLSLTCTVTGYSITSDYTWNWIRQFPGNKLEWMGYISYSGSTSYNPSLKSRISITRDTSKNQFFLQLNSVTTEDTATYYCARGRYGGSYAMDYWGQGTSVTVSS	DIQMTQTTSSLSASLGDRVTISCSASQGISNYLNWYHQKPDGTVKLLIYYTSSLHSGVPSRFSGSGSGTDYSLTIFNLEPEDIATYYCQQYSKLPYTFGGGTKLEIK
BD24-0149	E.amu APN	2.04833	/	QVQLKQSGPELVRPGASVKLSCKASGYTFTSYWMHWVKQRHGQGLEWIGNIYPGSGSTNYDEKFKSKGTLTVDTSSSTAYMHLSSLTSEDSAVYYCTRGGSSYGAWFAYWGQGTLVTVSA	DIQMTQSPASLSVSVGETVTITCRASENIYSNLAWYQQKQGKAPQVLVYAATNLADGVPSRFSGSGSGTQYSLKIKSLQSEDFGSYYCQHFWVTPYTFGGGTRLEIK
BD24-0150	E.amu APN	>5	/	EVQLQQSGPELKKPGETVKISCKASGYTFTDYSMHWVKQAPGKDLKWMGWINTETGQPTYADDFKGRFAFSLETSASTAYLQINNLKNEDTATYFCAPYGPTGDYYAMDYWGQGTSVTVSS	SIVMTQTPASLAVSLGQRATISCRASESVEYYGTSLMQWYQQKPGQPPKLLIYAASNVESGVPARFSGSGSGTDFGLNIHPVEEDDIAMYFCQQTRKVPYTFGGGTKLEIK
BD24-0151	E.amu APN	>5	/	EVKLVESGAELMKPGASVKISCKATGYTFSSYWIEWVKQRPGHGLEWIGEILPGSGSTNYNEKFKGKATFTADTSSNTAYIQLSSLTSEDSAVYYCARGYYGYYYAMDYWGQGTSVTVSS	DIQMTQTTSSLSASLGDRVTISCSASQGISNYLNWYQQKPDGTVKLLIYYTSSLHSGVPSRFSGSGSGTDYSLTISNLEPEDIATYYCQQYSKLPRTFGGGTKLELK
BD24-0152	E.amu APN	0.0169445	/	EVQLQQSGGGLVQPKGSLKLSCAASGFTFNTYAMNWVRQAPGKGLEWVARIRTKSNNYATFYADSVKDRFTISRDDSQNMLYLQMNNLKTEDTAMYYCVRPDMITTSWFAYWGQGTLVTVSS	QAVVTQESALTTSPGGTVILTCRSSTGAVTTSNYANWVQEKPDHLFTGLIGGTSNRLPGVPVRFSGSLIGDKAALTITGAQTEDDAMYFCALWYSTHYVFGGGTKVTVL
BD24-0154	E.amu APN	0.0170712	/	EVQLQESGGDLVKPGGSLKLSCTASGFTFSNYDISWVRQTPDKRLEWVATISSGGTYTYYSDSVKGRFTISRDNAKNTLYLQMNSLKSEDTAMYYCTRGGNYDYWGQGTTLTVSS	DIQMTQSPASLTVSLGQRATISCRASESVDNYGISFMNWFQQKPGQPPKLLIYAASNQGSGVPARFSGSGSGTDFSLNIHPMEEDDTAMYFCQQIKEVPWTFGGGTKLELK
BD24-0155	E.amu APN	0.100746	/	EVQLQESGPELEKPGASVKISCKASGYSFIGYNMNWVKQSNGKSLEWIGNINPYYGDTSYNQKFKGKATLTVDKSSSTAYMQLKSLTSEDSAVYYCARGGYDGAPFAYWGQGTLVTVSA	GIVMTQSPAIMSASLGEKVTMSCRASSSVNYMYWYQQKSDASPKLWIYYTSNLAPGVPARFSGSGSGNSYSLTISSMEGEDAATYYCQQFTSSPYMYTFGGGTKLEIK
BD24-0156	E.amu APN	0.0339725	/	EVQLQESGGGLVKPGGSLKLSCAASGFTFSSYTMSWVRQTPEKRLEWVAIISSGGSFTYYPDSVKGRFTISRDNAKNTLYLQMSSLKSEDTAMYYCTRDGEGTMITMTGFACWGQGTLVTVSS	EIVLTQSPSSMYASLGERVTITCKASQDINSYLSWFQQKPGKSPKTLIYRANRLVDGVPSRFSGSGSGQDYSLTISSLEYEDMGIYYCLQFDEFPLTFGAGTKLEIK
BD24-0157	E.amu APN	0.174274	/	QVQLQQSGAELARPGSSVKLSCKASGYTFTDYYINWVKQRTGQGLEWIGEIFPGSGNTYYNEKFKGRATLTADKSSSTAYLQLSSLTSEDSAVYFCARRNYAMDYWGQGTSVTVSS	DIQMTQSPASLSASVGETVTITCRASENIYSYLAWYQQKQGKSPQLLVHNAKTLAEGVPSRFSGSGSGTQFSLRINSLQPENFGTYYCQHHYGTPRTFGAGTKLELK
BD24-0158	E.amu APN	>5	/	DVKLVESGGDLVKPGGSLKLSCAASGFTFSNYGMSWVRQTPDKRLEWVATISSGGSYTYFPDSVKGRFTISRDNSKSTLYLQMSSLKSEDTAMYYCARHEGAGTWAFAYWGQGTLVTVSS	ETTVTQSPAIMSASPGEKVTMTCSASSSVSYMHWYQQKSGTSPKRWIYDTSKLASGVPARFSGSGSGTSYSLTISSMEAEDAATYYCQQWSSNPYTFGGGTKLEIK
BD24-0159	E.amu APN	3.81297	/	QRDLQQSGAELMKPGASVKISCKATGYIFSTYWIEWVKQRPGHGLEWIGEILTGSGSTNYNEKFKGKATFTADTSSNTAYMQLSSLTSEDSAVYYCARGYYGSSYYFDFWGQGTTLTVSS	DIQMTQTTSSLSASLGDRVTISCRASQDISNYLNWYQQKPDGTVKLLIYFTSRLHSGVPSRFSGSGSGTDYSLTISNLEHEDIATYFCQQGNMLPPTFGAGTKLELK
BD24-0160	E.amu APN	0.0278414	/	EVQLQESGPGLVAPSQSLSITCTVSGFSLTDYGVSWIRQPPGKGLEWLGVIWGFGSTYYNSALKSRLSISKDNSKSQVFLKMNSLQTDDTAMYYCVKQADGYYWYFDVWGAGTTVTVSS	DIQMTQSPSYLAASPGETITINCRASKSISKYLAWYQEKPGKTNKLLIYSGSTLQSGIPSRFSGSGSGTDFTLTISSLEPEDFAMYYCQQHNEYPWTFGGGTKLEIK
BD24-0161	E.amu APN	>5	/	QVQLQESGAELMKPGASVKISCKATGYTFSSYWIEWIKQRPGHGLEWIGEILPGSGSTNYNEKFKGKATFTADTSSNTAYMQLSSLTSEDSAVYYCARGYYGSSYHFDYWGQGTTLTVSS	DIQMTQTTSSLSASLGDRVTISCRASQDISNYLNWYQQKPDGTVKLLIYYTSRLHSGVPSRFSGSGSGTDYSLTISNLEQEDIATYFCQQGNTLPPTFGGGTKLEIK
BD24-0162	E.amu APN	>5	/	GVQLQQSGAEVMKPGASVKISCKATGYTFSTYWIEWVKQRPGHGLEWIGEILPGSGSTNYNEKFKGKATFTADTSSNTAYMQLSSLTSEDSAVYYCGRGYYGNSYYFDYWGQGTTLTVSS	DIQMTQTTSSLSASLGDRVTISCSASQVISNFLNWYQQKPDGTIKLLIYYTSSLHSGVPSRFSGSGSGTDYSLTISNLEPEDIATYYCQQYSMFPRTFGGGTKLEIK
BD24-0163	E.amu APN	>5	/	QVQNKSGPGLVAPSQSLSITCTVSGFSLTSHGVSWVRQPPGKGLEWLGVIWGDGNTNSHSALISRLSISKDNSKSQVFLKLNSLQTDDTATYYCAKPSGHDYDKGFAYWGPGTLVTVSS	SIVMTQSPSSLTVTAGEKVTVSCKSSQSLLNSGNQKNYLTWYQQKPGQPPKLLIFWASTRESGVPDRFTGSGSGTDFSLTISSVQAEDLAVYYCQSDYTYPYTFGGGTKLEIK
BD24-0164	E.amu APN	>5	/	EVLLVESGPELVKPGASVKMSCKASGYTFTSYYIHWVKQRPGQGLEWIGWIYPGDGSTKYNEEFRGKTTLTADKSSSTVYMLLSSLTSEDSAIYFCARGYYGYEFAYWGQGTLVTVSS	DILMTQSPASLAVSLGQRATISCRASQSVSTSTFSYMYWYQQKPGQPPKLLIKYASNLESGVPDRFSGSGSGTDFTLNIHPVEEDDTATYFCQHSWEIPTFGGGTRLEIK
BD24-0166	E.amu APN	0.0258995	/	EVKLEQSGGGLVKPGGSLKLSCAASGFTFSGYAMSWVRQTPEKRLEWVATISSAGTYTYYAESVKGRFTISRDNAKNTLYLQMRSLRSEDSAMYYCARRGLSPMITTDAMDYWGQGTSVTVSS	EIVLTQSPAILSVSPGERVSFSCRASQNIGTIIHWYQQRTNGSPRLLIKYASESISGIPSRFSGSGSGTDFTLSINSVESEDIADYYCQQTNSWPLTFGAGTRLEIK
BD24-0167	E.amu APN	>5	/	QVQLQQSGPGLVAPSQSLSITCTVSGFSLTDYGVSWIRQPPGKGLEWLGVIWGAGSTYYNSALKSRLSISKDNSKSQVFLKMNSLQTDDTAMYYCAKQVDGYYWYFDVWGAGTTVTVSS	DIQMTQSPSSMSASLGDRITITCQATQDIVKNLNWYQQKPGKPPSFLIYNVTELAEGVPSRFSGSGSGSDYSLTIRNLESEDFADYYCLQFYEFPWTFGGGTKLELK
BD24-0168	E.amu APN	0.144645	/	EVQLLETGPQLVRPGSSVKISCKASGYSFTIYWMHWVKQRPGQGLEWIGMIDPSDSETRLNRKFKDKATLTVDKSSSTAYMQLSSPTSEDSAVYYCARGGNPYYFDYWGPGTTLTVSS	DIQMTQSPATLSVTPGDSVSLSCRASQSISNNLYWYQQKSHESPRLLIKYASQSISGIPSRFSGSGSGTDFTLTINSVETEDFGIYFCQQSNSWPLTFGAGTKLEIK
BD24-0169	E.amu APN	1.45648	/	EVKLVESGPGLVAPSQSLSITCTVSGFSLTDYGVSWIRQPPGKGLEWLGVIWGGGSTYYNSALKSRLSFSKDNSKSQVFLKMNSLQTDDTAIYYCAKHRGYEWYFDVWGAGTTLTVSS	DIQMIQSPSYLAASPGQNITINCRASKSISKYLAWYQEKPGKTHKLLIYSGSNLKSGIPSRFSGSGSGTDFTLTISSLEPEDFAMYYCQQHNEYPYTFGGGTRLEIK
BD24-0170	E.amu APN	>5	/	EVQLQQSGAELMKPGASVKISCKATGYTFSTYWIEWVKQRPGHGLEWIGEILPGSGSTNYNEKFKGKATFTADTSSNTAYMQLSSLTSEDSAVYYCARGYYGNSYYFDYWGQGTTLTVSS	DIQMTQTTSSLSASLGDRVTISCSASQGISNYLNWYQQKPDGTVKLLIYYTSSLHSGVPSRFSGSGSGTDYSLTISNLEPEDIATYYCQQYSKFPRTFGGGTKLEIK
BD24-0171	E.amu APN	0.0520571	/	EVQLQQSGGGLVKPGGSLKLSCAASGFTFSSYTMSWVRQTPEKRLEWVAIISSGGSFTYYPDSVKGRFTISRDNAKNTLYLQMSSLKSEDTAMYYCTRDGEGTMITTTGFAYWGQGTLVTVSS	DIQMIQSPSSMYASLGERVTITCKASQDINNYLTWFQQKPGKSPKTLIYRANRLVDGVPSRFSGSGSGQDYSLTISSLEYEDMGIYYCLQYDEFPLTFGAGTKLEIK
BD24-0172	E.amu APN	>5	/	EVQLQEPGPELKKPGETVKISCKASGYTFTDYSMHWVKQAPGKGLKWMGWINTETGVPTYADDFKGRFAFSLETSASTAYLQINNLKNEEMATYFCAPYGPTGDYYAMDYWGQGTSVTVSA	DIQMTQSPASLAVSLGQRATISCRASESVEYYGTSLMQWYQQKPGQPPKLLIYAASNVESGVPARFSGSGSGTDFSLNIHPVEEDDIAMYFCQQSRKVPYTFGGGTKLEIK
BD24-0173	E.amu APN	1.42394	/	EVKLVESGPELVKPGASVKISCKASGYTFSDYNMHWVKQSHGKSLEWIGYIFPKDVLTGYSQKFKSKATLTVDNSSSTAYMELRSLTSEDSAVYYCARRNYGSSLDYWGQGTTLTVSS	DIQMTQSPASLSASVEETVTITCRASENIYSYLAWYQQNQGKSPQLLVYNAKTLAEGVPSRFSGSGSGTQFSLKINSLQPEDFGSYYCQHHYGTPPTFGGGTKLEIK
BD24-0174	E.amu APN	>5	/	EVKLVESGGGLVKPGGSLKLSCAASGFTFSIYAMSWVRQTPEKRLEWVATISSGGTYTYYPDSVKGRFTISRDNAKNTLYLQMSSLRSEDTAMYYCARGGNWDYWGQGTTLTVSS	DIVLTQSHKFMSTSVGDRVSITCKASQDVGSAVAWYQQKPGQSPKLLIYWASIWHTGVPDRFTGSGSGTDFTLTISNVQSEDLADYFCQQYSNYPYTFGGGTRLEIK
BD24-0175	E.amu APN	0.0178796	/	EVQLQESGAELAKPGASVKMSCKASGYTFTSYWIHWVKQRPGQGLQWIGFINPSTGYTEYNQKFKDKATLTADKSSSTAYMQLSSLASEDSAVYYCARSTMITRAWFAYWGQGTLVTVSS	EIVLTQSPASLSASVGETVTITCGASENIYGALNWYQRKQGKSPQLLIYGATNLADGMSSRFSGSGSGRQYSLKISSLHPDDVATYYCQNVLSSPYTFGGGTKLEIK
BD24-0176	E.amu APN	>5	/	EVQLQESGPGLVAPSQSLSITCTVSGFSLTGYGVNWVRQPPGKGLEWLGMIWGDGSTDYNSALKSRLSISKDNSKSQVFLKMNSLQTDDTARYYCARGANWAFAYWGQGTLVTVSA	DIQMTQSPSSLAVSAGEKVTMSCKSSQSLLNSRTRENYLAWYQQKPGQSPKLLIYWASTRESGVPDRFTGSGSGTDFTLTISSVQAEDLAVYYCKQSYNLFTFGSGTKLEIK
BD24-0177	E.amu APN	0.149979	/	QVQLQQSGPGLVAPSQSLSITCTVSGFSLTDNGVSWIRQPPGKGLEWLGVIWGAGSTYYNSALKSRLSISKDNSKSQVFLKMNSLQTDDTAMYYCAKQDGYYFYFDYWGQGTTLTVSS	EIVLTQSPSYLAASPGETITINCRASKSINKYLAWYQEKPGKTNKILIYSGSTLQSGIPSRFSGSGSGTDFTLTISSLEPEDFAMYYCQQHNEYPYTFGGGTKLEIK
BD24-0178	E.amu APN	0.0556843	/	EVQLQESGGGLVKPGGSLKLSCAASGFTFSSYTMSWVRQTPEKRLEWVAIISSGGSYTYYPDSVKGRFTISRDNAKNTLYLQMSSLKSEDTAMYYCTRDGEGTMITTTGFAYWGQGTLVTVSS	DIQMTQSPSSMYASLGERVTITCKASQDINSYLSWFQQKPGKSPKTLIYRANRLVDGVPSRFSGSGSGQDYSLTISSLEYEDMGIYYCLQYDEFPLTFGAGTKLEIK
BD24-0179	E.amu APN	0.189447	/	DVQLVESGPELVKPGASVKISCKASGYSFTDYIMLWVKQSHGKSLEWIGNINPYHGSTSYNLKFKGKATLTVDKSSSTAYMQLNSLTSEDSAVYYCARRNYAMDYWGQGTSVTVSS	DIQMTQSPASLSASVGETVTITCRASENIYSYLAWYQQKQGKSPQLLVYNAKTLAEGVPSRFSGSESGTQFSLKINSLQPEDFGTYYCQHHYGTPPTFGGGTRLEIK
BD24-0180	E.amu APN	>5	/	QIQLQQSGPELKKPGETVKISCKASGYTFTDYSMHWVRQAPGKGLKWMGWINTETGEPTYADDFKGRFALSLETSASTAYLQINNLKNEDTATYFCTRWATSGYGGVDYWGQGTTLTVSS	DIQMTQSPASLAVSLGQRATIFCRASESVEYYGTSLMQWYQQKPGQSPKLLIYAASNVESGVPARFSGSGSGTDFSLNIHPVEEDDIAMYFCQQSRKVPYTFGGGTKLEIK
BD24-0181	E.amu APN	>5	/	EVQLLETGAELMKPGASVQISCKATGYTFSTYWIEWVKQRPGHGLEWIGEILPGSGSTNYNEKFKGKATFTADTSSNTAYMQLSSLTSEDSAVYYCARGYYGNSYYFDYWGQGTTLTVSS	EIQMTQTTSSLSASLGDRVTISCSASQGISNYLNWYQQKPDGTVKLLIYYTSSLHSGVPSRFSGSGSGTDYSLTISNLEPEDVATYYCQQYSKFPRTFGGGTKLELK
BD24-0182	E.amu APN	>5	/	QPYLQQSGAELMKPGASVKISCKATGYTFSTYWIEWVKQRPGHGLEWIGEILPGSGSTNYNEKFKGKATFTADTSSNTVYMQLSSLTSEDSAVYYCARGYYGSSYHFDYWGQGTTLTVSS	DIQMTQTTSSLSASLGDRVTISCRASQDISNYLNWYQQKPDGTVKLLIYYTSRLHSGVPSKFSGSGSGTDYSLTISNLEQEDIATYFCQQSHTLPPTFGGGTKLEIK
BD24-0183	E.amu APN	0.171536	/	EVQLQESGGGLVKPGGSLKLSCAASGFTFSSYTMSWVRQTPEKRLEWVAIMSSGGSFTYYPDSVKGRFTISRDNAKKTLYLQMSSLKSEDTAMYYCTRDGEGTMITTTGFTYWGQGTLVTVSS	DIVITQTPSSMYVSLGERVTITCKASQDINSYLSWFQQKPGKSPKTLIYRANRLVDGVPSRFSGSGSGQDYSLTISSLEYEDMGIYYCLQYDEFPLTFGAGTRLEIK
BD24-0185	E.amu APN	2.1969	/	PVQLQQPGSELVRPGASVKLSCKASGYTLISYWIHWVKQRPGQGLEWIGNIYPSSGSSNYDEKFKNKATLTVDTSSSTAYMQLSSLTSEGSAVYYCTRFYDSRNPSFAYWGQGTLVTVSA	DIQMTQSPSTLSASLGDTITITCHASQNINVWLNWYQQMPGNIPKLLISKASNLHTGVPSRFSGSGSGTGFTLTISRLQPEDIATYYCQQGQSFPYTFGGGTKLEIK
BD24-0186	E.amu APN	0.142557	/	EVKLVESGGDLVQPGGSMKLSCVASGFTFSNYYMNWVRQSPEKGLEWVAEIRLKSNDYATHYAESVKGRFTISRDDSKSSVYLQVNNLRAEDTGIYYCTRQRISDYWGQGTSVTVSS	DIQMIQSQKIMSTSVGDRVSVTCKASQNVGTNVAWYQQKPGHSPKVLIFSASSRYSGVPDRFTGSGSGTDFTLTISNVQSADLAEYFCQQYNSYPLTFGAGTKLELK
BD24-0187	E.amu APN	1.65209	/	EVQLQQSGPGLVAPSQSLSITCTVSGFSLTDYGVSWIRQSPGKGLEWLGVIWGAGSTYYNSALKSRLSISKDNSKSQVLLKMNSLQTDDTAVYYCAKHFGGFYWFFDVWGAGTTLTVSS	DIQMTQSPSYLAASPGETVTINCRASKSISKYLAWYQEKPGKTNKFLIYSGSTLQSGIPSRFSGSGSGTDFTLTISSLEPEDFAMYYCQQHNEYPYTFGGGTKLEIK
BD24-0188	E.amu APN	0.050585	/	QVQLQQSGPGLVAPSQSLSITCTVSGFSLTDYGVSWIRQPPGKGLEWLGVIWGAGSTYYNSALRSRLSISKDNSKSQVFLKMNSLQTDDTAMYYCAKQVDGYYWYFDVWGAGTTVTVSS	DIQMTQSPSYLAASPGETITINCRASKSISKYLAWYQEKPGKTNKLLFHSGPTLQSGIPSRFSGSGSGTDFTLTISSLEPEDFATYYCQQYNEYPWTFGGGTKLEIK
