# Supplementary material for: Convergent utilization of APN receptor by hedgehog merbecoviruses
Source: Research Square preprint supplement (doi:10.21203/rs.3.rs-8368823/v1), 2026-02-18
Supplement: Supplementary file 5 [file c64cfe50258feba4a64a2c4e.xlsx]

## Sheet: Sheet1
	APN orthologues
Number	Name	Order	Abbreviation	Accession Number	Sequences
1	Ailuropoda melanoleuca	Carnivora	A.mel	GCF_002007445.2	MAKGFYISKPLGILVIILGVAAVCTIIALSVVYAQEKNKNTGSSTENPTATATATTTAATTLDQSKPWNRYRLPKTLIPSSYNVTLRPNLTPNSEGLYVFSGNSTVRFRCNESTNVIIIHSKNLNYTNVEGQRVALRGVGGSQAPAIDRTELVELTEYLVVHLREPLQVNSEYEMDSEFQGELADDLVGFYRSEYVENDVKKVLATTQMQATGARKSFPCFDEPAMKATFNITLIHPTSLVALSNMLPRGPTVPVTGDPNWSITEFETTPIMSTYLLAYIVSEFKNVETRAPSGVLIRIWARPGAIDEGHGSYALNVTGPILDFFSAHYDTPYPLNKSDQVALPDFSAGAMENWGLVTYRENALLYDPQSSSTGNQERVATVIAHELAHQWFGNLVTLE…
2	Artibeus jamaicensis	Chiroptera	A.jam	XP_037000911.2	MAKGFYISKPVGILGIILGAGAVATIIALSVVYSQEKSRSTENPVTTPTSPSTTESTTESTTESTTESTTAATTLDPDKPWNQYRLPQTLEPESYKVRLRPYLTPNQDGLYIFEGSSTVRFKCKEATDVIIIHSKKLNYSKTPEQHMVTLRGVGDAPVPDIEKTELVEVTEYLVVHLKSQLQAGSLYEMDTQFEGELSDDLGGFYRSEYTDGNEKKVLATTQMQSTDARKSFPCFDEPSMKAQFNITLVHPNNLTALSNMLPQGPSVPLADDPTWNETEFHPTPVMSTYLLAYIVSEFTSVQSVEEMAPNSNVLIRIWARPSATQAGHSDYALNVTGPILKFFAGHYATAYPLEKSDQVGLPDFNAGAMENWGLVTYRENSLLFDPQYSSSSNKERVVT…
3	Desmodus rotundus	Chiroptera	D.rot	XP_024417425.1	MAKGFYISKPLGILGIILGVGAVATIIALSVVYSQEKNKSTDSTTSGTAQPSTTVATTLDQSKPWNRYRLPQTLEPESYKVTLRPYLTPNKDGLYIFEGSSTVRFKCKEATDVIIIHSKKLKYVKTPEQHMVTLRGVGGAQAPAIDRTELVEVTEYLVVHLKSQLQAGSLYEMDSQFEGELADDLAGFYRSEYMDGNVKKVLATTQMQSADARKSFPCFDEPAMKARFNITLIHPNNLTALSNMLPIGPSVPFKEDPTWNKTEFQTTPVMSTYLLAYIVSEFTSVERKESMAPNNDVLIRIWARPSATAAGHGDYALSVTGSILKFFADHYTTPYPLEKSDQIGLPDFNAGAMENWGLVTYRETSLLFDPQISSSSNKERVVTVIAHELAHQWFGNLVT…
4	Eptesicus fuscus	Chiroptera	E.fus	XP_027994437.1	MAKGFFISKSLGILGIVLGVAAACTIIALSVVYAQEKNKNAESSAAAPTMSTTTSTMPTTTLDQSKPWNRYRLPRSLVPDSYQVTLRPYLQPQDGLYIFTGSSTVRFTCQEPTDVIIIHSKKLNYTNTQGHRVALQALGGSRAPEIDRTELVEVTEYLVVHLKGQLEAGVMYEMNSTFQGELADDLAGFYRSEYMDGNDKKVLATTQMQSADARKSFPCFDEPAMKARFNITLIHPHNLTALSNMLPKGPSVPLDGDPTWSVTEFHTTPVMSTYLLAYIVSEFTYVNMTEIMSTNQQVLIRIWARPSATAAGHGLYALNVTGRILNFFAQHYNTPYPLDKSDQIGLPDFNAGAMENWGLVTYRENSLLFDPESSSSSNKERVVTVIAHELTPAPPPQWF…
5	Hipposideros armiger	Chiroptera	H.arm	XP_019495554.1	MAKGFYISKPLGILGIVLGVAAVCTIIALSVVYDQEKNKNAESSAGAPTSPAATGAPSSPATTVTTTLDQSKPWNRYRLPKSLVPDSYNVKLRPFLTPNQDGLYTFRGSSTVRFTCKEPTDVIIIHSKKLNYTKTPDDHMVTLRGVGGSQPPGISHTELVEITEYLVVHLKGQLEVNSMYEMDSEFVGELADDLAGFYRSEYMDGGVKKVLATTQMQSADARKSFPCFDEPAMKATFNITLIHPSNLTALSNMLPKGPSVPFSEDPTWSVTEFDTTPVMSTYLLAYIVSEFTAVEETAPNNVLIRIWARPSATKEGHGIYALNKTGLILNFFAEHYNTSYPLTKSDQIGLPDFNAGAMENWGLVTYRENALLFDPESSSSSNKERVVTVIAHELAHQWF…
6	Homo sapiens	Primates	H.sap	NP_001368853.1	MAKGFYISKSLGILGILLGVAAVCTIIALSVVYSQEKNKNANSSPVASTTPSASATTNPASATTLDQSKAWNRYRLPNTLKPDSYRVTLRPYLTPNDRGLYVFKGSSTVRFTCKEATDVIIIHSKKLNYTLSQGHRVVLRGVGGSQPPDIDKTELVEPTEYLVVHLKGSLVKDSQYEMDSEFEGELADDLAGFYRSEYMEGNVRKVVATTQMQAADARKSFPCFDEPAMKAEFNITLIHPKDLTALSNMLPKGPSTPLPEDPNWNVTEFHTTPKMSTYLLAFIVSEFDYVEKQASNGVLIRIWARPSAIAAGHGDYALNVTGPILNFFAGHYDTPYPLPKSDQIGLPDFNAGAMENWGLVTYRENSLLFDPLSSSSSNKERVVTVIAHELAHQWFGNLV…
7	Macaca mulatta	Primates	M.mul	XP_001093727.3	MAKGFYISKSLGILGILLGVAAVCTIIALSVVYSQEKNKNAKSSLEASTTPSASATTSNPTLATTLDQSILWNRYRLPNTLKPDSYQVTLRPYLTPDDRGLYIFKGSSTVRFTCKEATDVIIIHSKKLNYTLSQGHRVVLRGVGGSQPPDIDRTELVEPTEYLVVHLRGSLVKDSQYEMDSEFEGELADDLAGFYRSEYMEGDVKKVVATTQMQAADARKSFPCFDEPAMKAEFNITLIHPKDLTALSNMLPKGPSTPLPEDPNWSVTEFHTTPKMSTYLLAFIVSEFTYVNSSNDVLIRIWARPSAIAAGHGDYALNVTGPILNFFAGHYDTPYPLPKSDQIGLPDFNAGAMENWGLVTYRENSLLFDPLSSSSSNKERVVTVIAHELAHQWFGNLVT…
8	Molossus molossus	Chiroptera	M.mol	XP_036133941.1	MAKGFYISKGLGILGIVLGIAAVCTIIALSVVYAQEKNKNVESATQAPTSTATTPTAATTLDQSKPWNRYRLPKTLEPDSYQVTLRPYLTARENNLYIFEGSSSVHFRCKEPTNVIIIHSKKLNYSTTAQGHMVTLRTLEGDKAPDIDKTELVEVTEYLVVHLKGELKAGSLYEMNATFKGELADDLAGFYRSEYMDGSEKKVLATTQMQSADARKSFPCFDEPAMKARFNITLIHLSNYTALSNMQPKGPSVPFEGDPAWNITEFHTTPVMSTYLLAYIVCEFTHVEESNPTNKDVLIRIWSRPSATSEGHGMYALNVTGPILRFFEQHYNTPYPLPKSDQIALPDFNAGAMENWGLVTYRESALLFDPASSSSSNKERVVTVIAHELAHQWFGNLVT…
9	Myotis lucifugus	Chiroptera	M.luc	XP_014304588.1	MAKGFYISKALGILGIVLGVAAACTIIALSVVYAQEKDKNAELSAQVATTVPTVDPSKPTVTTPTTTLDQSKPWNRYRLPRSLVPDSYQVTLRPYLTTNQHGLYIFEGSSTVHFMCQEXTNVIIIHSKKLNYTDIQGHRVTLKALGGAQAPKIDRTELVEVTEYLVVHLKGQLEKGVMYEMSSKFQGELADDLAGFYRSEYMDGNEKKVLATTQMQSADARKSFPCFDEPAMKARFNITLIHPHNLTALSNMLPTGPSTPLPEDPTWHVTKFHTTPVMSTYLLAYIVSEFTSVNMTETMSTNQNVLIRIWARPSATAAGHGQYALNVTGRILNFFAQHYNTPYPLDKSDQIGLPDFNAGAMENWGLVTYRENSLLFDPDSSSSSNKERVVTVIAHELAH…
10	Myotis myotis	Chiroptera	M.myo	XP_036211683.1	MAKGFYISKALGILGIVLGVAAACTIIALSVVYAQEKNKNAELSAQVATTLPTTDQNKPTATTPTTTLDQSKPWNRYRLPRSLVPDSYQVTLRPYLTPNQHGLYIFEGSSTVHFTCQEPTNIIIIHSKKLNYTDIQGHRVALQALGGAKAPEIDRTELVEVTEYLVVHLKSQLEAGVMYEMSSKFQGELADDLAGFYRSEYMDGNEKKVLATTQMQSADARKSFPCFDEPAMKARFNITLIHPHNLTALSNMLPKGPSTPLQGDPTWHVTEFHTTPIMSTYLLAYIVSEFTYVNMTETMSTNQNVLIRIWARPSATAAGHGQYALNVTGRILNFFAQHYNTPYPLDKSDQIGLPDFNAGAMENWGLVTYRENSLLFDPDSSSSSNKERVVTVIGHELAH…
11	Phyllostomus hastatus	Chiroptera	P.has	XP_045680750.1	MAKGFYISKPLGILGIILGIGAVATIIALSVVYSQEKNKNAENSGPASPTTPSSTVATTLDQSKPWNRYRLPGTLEPESYRVKLRPYLTPTKDGLYIFEGSSTVRFRCKEATDVIIIHSKKLKYVKTSEQHMVTLRGVDGAPVPAIDRTELVEVTEYLVVHLKGQLQKGSLYEMDSKFEGELADDLAGFYRSEYMDGGVKKVLATTQMQSADARKSFPCFDEPAMKARFNITLVHPNNLTALSNMLPKGPSTPLEDDPSWNETEFHTTPVMSTYLLAYIVSEFTSVEQTETMGPGNNVLIRIWARPSATKAGHGDYALKVTGPILKFFSDHYATPYPLEKSDQIGLPDFNAGAMENWGLVTYRENSLLFDPQVSSSSNKERVVTVIAHELAHQWFGNLV…
12	Pipistrellus kuhlii	Chiroptera	P.kuh	XP_036271433.1	MAKGFYISKGVGVLGIVLGIAAICTIIALSVVYSQEKNKNAESSAEAPTTTPTTTTSTSGPVTTAGSPATTLDQTKPWNRYRLPRSLVPDSYQVTLRPFLVPNEHGLYVFNGSSSVHFTCQEPTNVIIIHSKKLNYTDTQGHRVALRALGGAAPAPEIDRTELVEVTEYLVVHLKDQLQAGVMYEMNSTFQGELADDLAGFYRSEYMDGTQKKVLATTQMQSADARKSFPCFDEPAMKARFNITLIHPHNLTALSNMLPKGSSVPLEGDAEWSVTEFHTTPVMSTYLLAYIVSEFTNVNRTEAMSTQQEVLIRIWARPSATEAGHGQYALNVTGSILNFFAQHYNTAYPLEKSDQIGLPDFNAGAMENWGLVTYRENSLLFDPDSSSSSNKERVVTVIA…
13	Pteropus alecto	Chiroptera	P.ale	XP_006905412.1	MAKGFYISKSLGILAILLGVAAMCTIIALSIVYAQEKNKNVENSSQAPTSPATSPATSPATTVATTLDQSEPWNQYRLPQTLAPESYQVTLRPYLTPNENGLYIFKGSSTVRFICKEPTNVIIIHSKKLNYTTTEGHRVVLRGVGSSQAPAIDRTELVELTEYLVVHLKDSLQAGSLYEMDSEFEGELADDLAGFYRSEYTDGDVKKVLATTQMEATDARKSFPCFDEPAMKATFNITLIHPSNLTALSNMLPKGPSVPLTEDPTWNVTEFHTTPVMSTYLLAYIVSEFTCVEEMASNSVLIRIWARPSATRENQGLYALNVTGPILSFYAQHYDTPYPLDKSDQIGLPDFNAGAMENWGLVTYRENSLLFDSLSSSTSNKERVVTVIAHELAHQWFGN…
14	Pteropus giganteus	Chiroptera	P.gig	XP_039714358.1	MAKGFYISKSLGILAILLGVAAMCTIIALSIVYAQEKNKNVENSSQAPTSPATSPPPPAPSPATTVATTLDQSEPWNQYRLPQTLAPESYQVTLRPYLTPNENGLYIFKGSSTVRFICKEPTNVIIIHSKKLNYTTTEGHMVVLRGVGSSQAPAIDRTELVELTEYLVVHLKDSLQAGSLYEMDSEFEGELADDLAGFYRSEYTDGNVKKVLATTQMQATDARKSFPCFDEPAMKATFNITLIHPSNLTALSNMLPKGASVPLTEDPTWNVTEFHTTPVMSTYLLAYIVSEFTCVEEMASNSVLIRIWARPSATRENQGLYALNVTGPILSFYAQHYDTPYPLDKSDQIGLPDFNAGAMENWGLVTYRENSLLFDSLSSSTSNKERVVTVIAHELAHQW…
15	Pteropus vampyrus	Chiroptera	P.vam	XP_011377952.1	MAKGFYISKSLGILAILLGVAAMCTIIALSIVYAQEKNKNVENSSQAPTSPATSPATSPATSPATTVATTVATTLDQSEPWNQYRLPQTLAPESYQVTLRPYLTPNENGLYIFKGSSTVRFICKEPTDVIIIHSKKLNYTTTEGHMVVLRGVGSSEAPAIDRTELVELTEYLVVHLKDSLQAGSLYEMDSEFEGELADDLAGFYRSEYMDGNVKKVLATTQMEATDARKSFPCFDEPAMKATFNITLIHPSNLTALSNMLPKGASVPLTEDPTWNVTEFHTTPVMSTYLLAYIVSEFTCVEEMASNDVLIRIWARPSATRENQGLYALNVTGPILSFYAQHYDTPYPLNKSDQIGLPDFNAGAMENWGLVTYRENSLLFDSLSSSTSNKERVVTVIAHE…
16	Rhinolophus ferrumequinum	Chiroptera	R.fer	XP_032956109.1	MAKPHVVLGILLGLAAVSTIIALSVLYSQEKNKNAESSPGVVPTSPATTVSTTLDQSKPWNRYRLPRTLVPESYNVKLQPFLTPDNNGLYIFKGWSTVRFTCKEPTNLIIIHSKKLNYTTPNGHRVTLRGVGGSQPPTIDRTELVELTEYLVVHLNGELQAGSMYEMDSEFVGELADDLAGFYRSEYMDGNVKKVLATTQMQSADARKSFPCFDEPAMKATFNITLIYPRNLTALSNMLPKGPSVPFLNDSTWSVTEFHTTPVMSTYLLAYIVSEFTSVEQKAPNDVLIRIWARPSATAAGHGMYALNKTGPILSFFAQHYNTAYPLEKSDQIGLPDFNAGAMENWGLVTYRENSLLFDPQSSSSSNKERVVTVIAHELAHQWFGNLVTVAWWNDLWLN…
17	Rousettus aegyptiacus	Chiroptera	R.aeg	XP_016007055.1	MAKGFYISKSLGILAILLGVAAVCTIIALSIVYAQEKNRNVESSSQAPTSLSTTTTVATTLDQSKAWNQYRLPQTLMPESYQVTLRPYLTPNEEGLYIFKGSSTVRFICKEPTDVIIIHSKKLNYTTTQGHMVVLRGVGSSQAPAIDRTELVETTEYLVVHLKGSLEAESVYEMDSVFEGELADDLAGFYRSEYLDGNVKKVLATTQMQSTDARKSFPCFDEPAMKATFNITLIHPSNLTALSNMLPKGPSVPLTEDPTWNVTEFHTTPVMSTYLLAYIVSEFTCVQETAENDVLIRIWSRPSATKENQGLYALNVTGPILNFFAQHYDTPYPLEKSDQIGLPDFNAGAMENWGLVTYRENSLLFDPLSSSTSNKERVVTVIAHELAHQWFGNLVTVAW…
18	Sturnira hondurensis	Chiroptera	S.hon	XP_036909514.1	MAKGFYISKPLGILGIILCVGAVATIIALSVVYSQEKSKDTGNPVPNPTSPSTTTATTLDPSKPWNRYRLPRTLEPESYKVKLRPYLTPNKDGLYIFEGSSTVRFKCKEATDVIIIHSKKLKYVKTPEQHLVTLRGVGGAPVPAIDRTELVEVTEYLVVHLKGQLQAGGLYEMDSQFEGELSDDLGGFYRSEYMDGNEKKVLATTQMEPTDARKSFPCFDEPSMKAQFNITLVHPNNFKALSNMLPQGSSVPLEGDPTWMETQFHPTPVMSTYLLAYIVSEFTSVEREEEMSPNNNVLIRIWARPSATQAGHSAYALNVTGPILKFFAGHYATAYPLEKSDQIGLPDFNAGAMENWGLVTYRENSLLFDPLDSSINNKERVVTVIAHELAHQWFGNLVT…
19	Sus scrofa	Artiodactyla	S.scr	NP_999442.1	MAKGFYISKALGILGILLGVAAVATIIALSVVYAQEKNKNAEHVPQAPTSPTITTTAAITLDQSKPWNRYRLPTTLLPDSYFVTLRPYLTPNADGLYIFKGKSIVRLLCQEPTDVIIIHSKKLNYTTQGHMVVLRGVGDSQVPEIDRTELVELTEYLVVHLKGSLQPGHMYEMESEFQGELADDLAGFYRSEYMEGNVKKVLATTQMQSTDARKSFPCFDEPAMKATFNITLIHPNNLTALSNMPPKGSSTPLAEDPNWSVTEFETTPVMSTYLLAYIVSEFQSVNETAQNGVLIRIWARPNAIAEGHGMYALNVTGPILNFFANHYNTSYPLPKSDQIALPDFNAGAMENWGLVTYRENALLFDPQSSSISNKERVVTVIAHELAHQWFGNLVTLAWW…
20	Bos mutus	Artiodactyla	B.mut	GCF_000298355.1	MAKGFYISKALGILAILLGVAAVATIIALSVVYAQEKNKNAERGTADAPRRPTTTSATTLDQSKPWNRYRLPTTLLPDSYRVTLRPYLTPNNNGLYIFTGSSTVRFTCKEPTDVIIIHSKKLNYTQHSGHLAVLRGVGDTQAPEIDRTELVLLTEYLVVHLKSSLEAGKTYEMETTFQGELADDLAGFYRSEYMDGNVKKVLATTQMQSTDARKSFPCFDEPAMKATFNITLIHPKELTALSNMPPKGPSVPFDGDSNWSVTEFETTPVMSTYLLAYIVSEFTSVESVAPNDVQIRIWARPKATADNHGLYALNVTGPILNFFANHYNTAYPLPKSDQIALPDFNAGAMENWGLVTYRENALLYDPQSSSSSNKERVVTVIAHELAHQWFGNLVTLAWW…
21	Bos taurus	Artiodactyla	B.tar	GCF_002263795.3	MAKGFYISKALGILAILLGVAAVATIIALSVVYAQEKNKNAERGTAAPTSPTGPTTTSATTLDQSKPWNRYRLPTTLLPDSYRVTLRPYLTPNNNGLYIFTGSSTVRFTCKEPTDVIIIHSKKLNYTQHSGHLAVLRGVGDTQAPEIDRTELVLLTEYLVVHLKSSLEAGKTYEMETTFQGELADDLAGFYRSEYMDGNVKKVLATTQMQSTDARKSFPCFDEPAMKATFNITLIHPKDLTALSNMPPKGPSVPFDGDSNWSVTEFETTPVMSTYLLAYIVSEFTSVESVAPNDVQIRIWARPKATADNHGLYALNVTGPILNFFANHYNTAYPLPKSDQIALPDFNAGAMENWGLVTYRENALLYDPQSSSSSNKERVVTVIAHELAHQWFGNLVTLA…
22	Bubalus bubalis	Artiodactyla	B.bub	GCF_019923935.1	MAKGFYISKALGILAILLGVAAVATIIALSVVYAQEKNKNAERGTAAPTSSTGPTTTSATTLDQSKPWNRYRLPTTLLPDSYRVTLRPYLTPNDNGLYIFTGSSTVRFTCKEPTDVIIIHSKKLNYTQHSGHLAVLTGVGGTQAPEIDRTELVLLTEYLVVHLKSSLEAGKTYEMETTFQGELADDLAGFYRSEYMDGNVKKVLATTQMQSTDARKSFPCFDEPAMKATFNITLIHPKELTALSNMPPKGPSVSFDGDPNWNVTEFETTPVMSTYLLAYIVSEFTSVESMAPNDVQIRIWARPKATTDNHGLYALNVTGPILNFFANHYNTAYPLPKSDQIALPDFNAGAMENWGLVTYRENALLYDPQSSSSSNKERVVTVIAHELAHQWFGNLVTLA…
23	Callithrix jacchus	Primates	C.jac	GCF_011100555.1	MAKGFYISKSLGIVGISLGMAALCTIVALSVVYAQEKNKNAESSLGAATTTTSASGATTTSASAATLDQSKPWNRYRLPNTLKPDSYQVTLQPHLTPNDQGLYVFSGSSTVRFTCVVATDVIIIHSKKLNYTLIEGHRVVLRGVGGSQAPDIERTELVEPTEYLVVHLMSSLVKDSQYEMSSTFVGELADDLAGFYRSEYMDGNVKKVVATTQMQAADARKSFPCFDEPAMKAEFNITLIHPKNLTALSNMLPKGPGTPLPEDPNWIVTEFHPTPKMSTYLLAYIISEFTYVEKQASNGVLIRIWARPSAIEAGHGDYALNVTGPILNFFASHYNTSYPLPKSDQIGLPDFNAGAMENWGLVTYRENSLLFDPLSSSSSNKERVVTVIAHELAHQWFGN…
24	Camelus dromedarius	Artiodactyla	C.dro	GCF_036321535.1	MGKGFYISKALGILGILLGVAAVATIIALSVVYAQEKNKNAECATVAPSTTPSTTPSTSSATTLDQSKPWNQYRLPTTLLPDSYNVKLRPYLTPNDKGLYIFKGTSTVRFICKEPTNVIIIHSKKLNYTTTQEHMVVLRGVGGTQAPSIDRTELVELTQYLVVHLKGSLEAGRMYEMDAEFEGELADDLAGFYRSEYMEGNVKKVLATTQMQAPDARKSFPCFDEPAMKATFNITLIHPKDLTALSNMLPKGPSVPLEGDPNWNVTEFETTPKMSTYLLAFIVSEFTCVEGKSANDVLIRIWARPNATAEGHGIYALNKTGPILDFFAHHYATSYPLPKSDQIALPDFNAGAMENWGLVTYRENALLFDPLSSSISNKERVVTVIAHELAHQWFGNLVT…
25	Camelus ferus	Artiodactyla	C.fer	GCF_009834535.1	MGKGFYISKALGILGILLGVAAVATIIALSVVYAQEKNKNAECATVAPSTTPSTTPSTSSATTLDQSKPWNQYRLPTTLLPDSYNVKLRPYLTPNDKGLYIFKGTSTVRFICKEPTNVIIIHSKKLNYTTTQEHMVVLRGVGGTQAPSIDRTELVELTQYLVVHLKGSLEAGRMYEMDTEFEGELADDLAGFYRSEYMEGNVKKVLATTQMQAPDARKSFPCFDEPAMKATFNITLIHPKDLTALSNMLPKGPSVPLEGDPNWNVTEFETTPKMSTYLLAFIVSEFTCVEGKSANDVLIRIWARPNATAEGHGIYALNKTGPILDFFAHHYATSYPLPKSDQIALPDFNAGAMENWGLVTYRENALLFDPLSSSISNKERVVTVIAHELAHQWFGNLVT…
26	Capra hircus	Artiodactyla	C.hir	GCF_001704415.2	MAKGFYISKALGILAILLGVAAVATIIALSVVYAQEKNKNAECGTSPTSPTSATSPTGPTSPTTTSATTVDQSKPWNRYRLPTTLLPDSYRVTLRPYLTLDKNGLYIFTGSSTVRFACKESTDVIIIHSKKLNYTTTNGHLVVLRGVGGAQAPEIDRTELVLLTEYLVVHLKSPLEAGKMYEMETTFQGELADDLAGFYRSEYMDGNVKKVLATTQMQSTDARKSFPCFDEPAMKATFNITLIHPKELTALSNMPPKGPSVPLEGEPDWNVTEFETTPVMSTYLLAYIVSEFTSVESQAPNGVQIRIWARPKATAARHGLYALNVTGPILNFFANHYNTAYPLPKSDQIALPDFNAGAMENWGLVTYRENALLYDPQSSSSSNKERVVTVIAHELAHQW…
27	Felis catus	Carnivora	F.cat	NP_001009252.2	MAKGFYISKPVGILAILLGVAAVCTIIALSVVYSQEKNRSTESSTAASTAAPTGPTTTVATTLDQSKPWNVYRLPKTLIPDSYNVTLRPYLTPNNKGLYVFTGTNIVRFTCKESTNIVIIHSKRLNYTSHQGHMVALSGVGGFHPQPVIVRTELVELTEYLVVHLQEPLVAGRQYEMNSEFQGELADDLAGFYRSEYMENGVKKVLATTHMQATEARKSFPCFDEPAMKATFNITIIHPNNLVALSNMLPRGPSVPFGEDPTWKVTEFETTPIMSTYLLAYIVSEFSYVETRAPSGVLIRIWARPSAINQGHGDYALKVTGPILDFFSQHYDTPYPLNKSDQIALPDFNAGAMENWGLVTYRESALLYDRQSSSSGNQERVVTVIAHELAHQWFGNLVT…
28	Ceratotherium simum	Perissodactyla	C.sim	GCF_000283155.1	MAKGFYISKTLGILGVVLGVAAVCTIIALSVVYSQEKNKNAGSSAAATTSHTTSPTTTAATTLDQSEPWNQYRLPTTLVPESYRVKLRPYLTPNEQGLYIFQGKSTVRFTCKEATDVIIIHSKQLNYTLTQGHMVVLRGVGDAQPPEIDRTELVELTQYLVVHLKGTLAEGSLYEMDSEFEGELADDLAGFYRSEYTEGNVKKVLATTQMQAADARKSFPCFDEPSMKAQFNITLIHPKDLTALSNMLPKSPSVSFSEDPDWNITEFESTPVMSTYLLAFIVCEFSYVDSRSPNDVLIRIWARPSAIAEGHGVYALNVTGPILNFFASHYNTSYPLDKSDQVALPDFNAGAMENWGLVTYRESALLFDLLSSSISNKERVVTVIAHELAHQWFGNLVTV…
29	Gallus gallus	Aves	G.gal	ACZ95799.1	MAAGFFISKSVGIVGIVLALGAVATIIALSVVYAQEKNKSSGGSGGSDTTSTTTASTTTASTTAAPNNPWNRWRLPTALKPESYEVTLQPFLTPDDNNMYIFKGNSSVVFLCEEATDLILIHSNKLNYTLQGGFHASLHAVNGSTPPTISNTWLETNTQYLVLQLAGPLQQGQHYRLFSIFTGELADDLAGFYRSEYTEGNVTKVVATTQMQAPDARKAFPCFDEPAMKAVFTVTMIHPSDHKAISNMPAHSTYQLQMDGQSWNVTQFDPTPRMSTYLLAFIVSQFDYVENNTGKVQIRIWGRPAAIAEGQGEYALEKTGPILSFFERHYNTAYPLPKSDQVGLPDFNAGAMENWGLVTYRENSLLYDNAYSSIGNKERVVTVIAHELAHQWFGNLVTL…
30	Cricetulus griseus	Rodentia	C.gri	GCF_003668045.3	MAKGFYISKTLGILGILLGIAAVCTIIALSVVYAQEKNKNAENSATAPTSDPTSATTSTATTTPSVDESKPWNRYRLPTTLIPESYQVTLRPYLTPNEQGLYIFKGSSTVRFTCNNTTDVIIIHSKKLTYTPKGGHLVALRALGGPQAPAIVKTELVERTEYLVVHLQANLTKGNLYEMESEFQGELADDLAGFYRSEYMEGGIKKVVATTQMQAPDARKSFPCFDEPAMKAIFNITLIHPANFTALSNMLPKGKPGCPGPLQGDSSWTVTEFHPTPKMSTYLLAYIVSEFKSVKQDPPGKVQIRIWARPSAIDEGHGDYALNVTGPILNFFAQHYNTSYPLEKSDQIALPDFNAGAMENWGLVTYRESALLYDPLSSSIGNKERVVTVIAHELAHQWF…
31	Cynopterus sphinx	Chiroptera	C.sph	GCA_030015415.1	MAKGFYISKSLGILAIFLGVAAVCTIVALSVVYAQEKNKNIESPSQAPTSPSITAATTKTTTAGTTKTTTAGTTTTTAAGTTTTTAAATTLDQSKPWNQYRLPQTLKPESYQVTLRPYLTPNEDGLYIFKGSSTVRFICNEPTDVIIIHSKNLNYTTTQGHMVVLRGVGSSQAPAIESTELVELTEYLVVHLSGSLQAGSTYEMDSQFEGELADDLAGFYRSEYTEDSVKKVLATTQMQATDARKSFPCFDEPAMKATFNITLIHPSNLTALSNMLPKGDSVPLEEDPTWNVTEFHTTPVMSTYLLAYIVSEFTCVEETAPSDVLIRIWARPSATRENHGLYALNVTGRILDFYAQHYDTPYPLSKSDQVGLPDFNAGAMENWGLVTYRENSLLFDPLS…
32	Equus caballus	Perissodactyla	E.cab	GCF_002863925.1	MAKGFYISKTLGILGIVLCVAAVCTIVALSVVYTQEKNKNAASSTAASTSPPTSPSTTAATTLDQSQPWNRYRLPPTLVPESYNVTLRPYLTPNEQGLYIFTGSSTVRFTCKEPTDVIIIHSKQLNYTTTEEHRVVLRGVGGAQAPDIDRTELVELTQYLVVHLKGPLEAGSLYEMDTKFQGELADDLAGFYRSEYMDGDVRKVLATTQMQAPDARKSFPCFDEPSMKASFNITLIHPRDLTALSNMQPRGPSVPLSEDPNWSITEFESTPVMSTYLLAFIVSEFTYVESKSPDDVLIRIWARPSATAEGHGSYALNVTGPILSFFAGHYDTPYPLDKSDQIALPDFNAGAMENWGLVTYRENSLLFDPLSSSSSNKERVVTVIAHELAHQWFGNLVTV…
33	Erinaceus europaeus	Erinaceomorpha	E.eur	GCF_950295315.1	MAKGFFISKTVGILGIVLAVAAVSTIIALSVVYSQEKNKNTASSTTAAPSVTTSQATTLDQSKPWNRYRLPESLEPHSYSVVLRPYLDPNAQGLYIFEGNSTVRFICKSATNVIIIHSKKLNYTREPKVVLRGVDAQAPQIQNIELVEVTEYLVVHLKNNLEVSKTYEMDSTFRGELADDLAGFYRSEYMEDNVKKVVATTQMQAADARKSFPCFDEPAMKAYFNITIIHPKDRTALSNMPPKGPSKPLPEDNNWLITEFETTPKMSTYLLAYIVSEFKEVNAVTPNDIQIRIWARPRAIDAGHGDYALKVTGPILTFFAQHYNTSYPLSKSDQIGLPDFNAGAMENWGLVTYRESALLFDNLTSSIGNQERVVTVIAHELAHQWFGNLVTIRWWNDLW…
34	Eumetopias jubatus	Carnivora	E.jub	GCF_004028035.1	MAKGFYISKTLGILVIILGVAAVCTIIALSVVYAEEKNKNTGSSTEGSTAGPTAGPTAGPTAGPTKPMTTTATTTATTLDQSKPWNHYRLPKTLIPSSYNVTLQPYLTPNSEGLYTFHGTSTVRFMCNESTNVIIIHSKKLNYTDMQGQRVALRGVGGTQTPTIDTTELVELTEYLVVHLREPLQVNGQYEMDSRFHGELADDLAGFYRSEYTENGVKKVLATTQMQATHARKSFPCFDEPAMKATFNITLIHPVNFVALSNMLPRGPSVPLSGDGNWSVTEFETTPVMSTYLLAYIVSEFKSVKTTAPSGVLIRIWARPSGIDQGHGKYALNVTGPILDFFSIHYDTPYPLNKSDQVALPDFNAGAMENWGLVTYRENSLLYDPQSSSSGNQERVATV…
35	Globicephala melas	Cetacea	G.mel	GCF_963455315.2	MAKGFYISKALGILGILLGVAAIATIIALSVLYDQEKNQNAGYATTVAPTSPVTTITTATTLDQSKPWNRYRLPTTLLPDSYKVTLRPYLTPNENGLYIFTGTSIVRFICKAPTDVIIIHSKKLNYTTTQGHMVALRGVGGFSAPDIARTELVEPTEYLVVHLKGSLEAGRMYEMESAFQGELADDLAGFYRSEYMEGNVKKVLATTQMQSTDARKSFPCFDEPAMKATFNITLIYPNGFTALSNMPPKGPSVPFAEDPKWNVIEFETTPVMSTYLLAYIVCEFTSVKTMAPNNVQVGIWARPNAIAENHGNYALNVTGPILDFFAKHFDTPYPLPKSDQVALPDFNAGAMENWGLVTYRENSLLFDPQASSSSNKERVVTVIAHELAHQWFGNLVTLA…
36	Gorilla gorilla gorilla	Primates	G.gor	GCF_029281585.2	MAKGFYISKSLGILGILLGVAAVCTIIALSVVYSQEKNKNANSSPVASTTPSASATTNPASATTLDQSKAWNRYRLPSTLKPDSYQVTLRPYLTPNDRGLYVFKGSSTVRFTCKEATDVIIIHSKKLNYTLSQGHRVVLRGVGGSQPPDIDRTELVEPTEYLVVHLKGSLVKDSQYEMDSEFEGELADDLAGFYRSEYMEGNVRKVVATTQMQAADARKSFPCFDEPAMKAEFNITLIHPKDLTALSNMLPKGPSTPLPEDPNWSVTEFHTTPKMSTYLLAFIVSEFDYVEKQASNGVLIRIWARPSAIAAGHGDYALNVTGPILNFFAGHYDTPYPLPKSDQIGLPDFNAGAMENWGLVTYRENSLLFDPLSSSSSNKERVVTVIAHELAHQWFGNLV…
37	Hipposideros galeritus	Chiroptera	H.gal	GCA_004027415.1	MAKGFYISKPLGILGIVLGVAAVCTIIALSVVYDQEKNKNAESSAGAPTSPATTVTTTLDQSKPWNRYRLPKSLVPDSYKVTLRPFLTPNQDGLYIFSGSSTVRFTCKEPTDVIIIHSKKLNYTKTPDNHMVALRGVGGSQPPAISHTELVEVTEYLVVHLKGQLEVNSMYEMDSNFVGELADDLAGFYRSEYMDGNVKKVLATTQMQSADARKSFPCFDEPAMKATFNITLIHPNNLTALSNMLPKGPSVPFTDDPTWSITEFETTPVMSTYLLAYIVSEFTSVEEKAPNNVLIRIWARPSATKEQHGIYALNKTGPILNFFAEHYNTPYPLTKSDQIGLPDFNAGAMENWGLVTYRENSLLFDPKSSSSSNKERVVTVIAHELAHQWFGNLVTVAWW…
38	Ictidomys tridecemlineatus	Rodentia	I.tri	GCF_016881025.1	MAKGFYISKSLGILGILLGVAALCTIVALSVVYAQEKNRNAESFTEAPEIPVVSTTASATTVDQNLPWNQYRLPTSLIPDSYQVKLRPYFTPNKDGLYIFEGSSSVLFTCKEATNVIIIHSKKLNYTRKQEHMVVLRGVGDSQPPAIDRTELVERTEYLVVHLKGYLEVGHKYQMDTEFQGELADDLAGFYRSEYMDGNVKKVVATTQMQAADARKSFPCFDEPAMKARFSITLIHPKDYVALSNMLPKGGSVPLEGEPDWSITEFQTTPKMSTYLLAYIVSEFTKVETQSPNNVLIRIWARPSAIDEGHGDYALNVTGPILNFFAGHYDTPYPLEKSGESGVLKREAVGTAPHRGHPTNRLSSADQIGLPDFNAGAMENWGLVTYRENSLLFDPLSSS…
39	Jaculus jaculus	Rodentia	J.jac	GCF_020740685.1	MAKGFYISKSLGILGILLGIAAVCTIVALSVVYAQEKNRNAESSAPVPTLPDTTATTLTTSIDASKPWNQYRLPKSLIPDSYQVTLRPYLTPNEQGLYIFEGSSTVLFTCNEATDVIIIHSKKLEYTLVQGHRVVLRALDGSQPPGIIRTELVERTEYLVVHLESPLTKGKQYEMESKFKGELADDLAGFYRSEYVENDVKKVVATTQMQATDARKSFPCFDEPAMKAKFNITLIHPNHLTALSNMLPKGPSTPLQGDSSWHVTEFHTTPKMSTYLLAYIVSEFQKVDSESPNKVLIRIWARPSAIAQGHGSYALNVTGPILNFFAGHYNTPYPLEKSDQIGLPDFNAGAMENWGLVTYRENSLLFDPQISSISNKERVVTVIAHELAHQWFGNLVTVD…
40	Lipotes vexillifer	Artiodactyla	L.vex	GCF_000442215.2	MAKGFYISKALGILGILLGVAAIATVIALSVLYAQEKNKNAGYATTVAPTSPATTITAATTLDQSKPWNRYRLPTTLLPDSYKVTLRPYLTPNENGLYIFKGRSIVRFICKARTDVIIIHSKKLNYTTIQGHMVVLRGVGAFSAPDIDRTELVEPTEYLVVHLKGWLEAGRMYEMESEFQGELADDLAGFYRSEYMEGNVKKVVATTQMQSTDARKSFPCFDEPAMKATFNITLIYPKELTALSNMPPKGPSVPFPEDPNWRVTEFKTTPVMSTYLLAYIVSEFTSVETMAPNNVQVRIWARPNATAENHGSYALNVTGPILNFFANHFDTPYPLPKSDQVALPDFNAGAMENWGLVTYRENSLLFDPQASSSSNKERVVTVIAHELAHQWFGNLVTLA…
41	Macaca fascicularis	Primates	M.fas	GCF_037993035.1	MAKGFYISKSLGILGILLGVAAVCTIIALSVVYSQEKNKNAKSSLEASTTPSASATTSNPTLATTLDQSILWNRYRLPNTLKPDSYQVTLRPYLTPDDRGLYIFKGSSTVRFTCKEATDVIIIHSKKLNYTLSQGHRVVLRGVGGSQPPDIDRTELVEPTEYLVVHLRGSLVKDSQYEMDSEFEGELADDLKGFYRSEYMEGDVKKVVATTQMEAPDARKSFPCFDEPAMKAEFNITLIHPKDLTALSNMLPKGPSTPLPEDPNWSVTEFHTTPKMSTYLLAFIVSEFTYVETQASNDVLIRIWARPSAIAAGHGDYALNVTGPILNFFASHYDTPYPLPKSDQIGLPDFNAGAMENWGLVTYRENSLLFDPLSSSSSNKERVVTVIAHELAHQWFGNL…
42	Manis javanica	Pholidota	M.jav	GCF_014570535.1	MAKGFYISKAVGVLAILLGLAAVSVIIALSVVYSQEKNKNDKSTTAAPTGSTTMAAPTGSTTTAAITLDQSKPWNHYRLPKTLIPDSYNVVLRPYLTPNDKGLYIFKGNSTVRFTCVEATDVIIIHSKKLNYTTVGGHRVVLKAVGSSQVAPDIDRTELVEITEYLVVHLRGQLVAGGVYELFSEFEGELADDLAGFYRSEYMEGNVKKVLATTQMQAPDARKSFPCFDEPAMKATFNITLIHWSNLTALSNMLPKGPSVPLKEEATWSVTEFHTTPKMSTYLLAYIVSEFTYVERIAPNNIQIRIWARPGAINESHGDYALNVTGPILSFFARHYDTPYPLNKSDQIALPDFNAGAMENWGLVTYRESALLFDPLSSSSGNKERVVTVIAHELAHQWF…
43	Mesocricetus auratus	Rodentia	M.aur	GCF_017639785.1	MAKGFYISKTLGILGILLGVAAVCTIIALSVVYAQEKNKNAENSAVAPTSATTTSTTTTSATTTSTTTTSTATTSTTTTSTATPTIPADESKPWNQYRLPKTLIPDSYQVTLRPYLTPNEQGLYIFEGNSTVHFTCNNATDVIIIHSKKLNYTLKAGHMVALRALDGSQAPAITKTELVERTEYLVVHLGGSLTKGNQYAMESQFQGELADDLAGFYRSEYMEDGIKKVVATTQMQAPDARKSFPCFDEPAMKAIFNITLIHPSNFTALSNMLPKGEPGCPGPFQEDPSWNITEFHPTPKMSTYLLAYIVSEFKYVEDVSPNNVQIRIWARPSAIEEGHGAYALSVTGPILSFFAQHYDTPYPLEKSGEWPWGLHGEVVLGSHPCPPADTWLPSTDQIA…
44	Miniopterus natalensis	Chiroptera	M.nat	GCF_001595765.1	MAKGFYISKGLGILGIVLGVAAVCTIVALSVVYAQEKNKNAEVSAGSPTTAAPPGTTTATTTAPTTLDQSKPWNRYRLPKSLVPDSYQVKLRPHLTPNGQGLYIFEGWSTVHFMCQEPTSTIIIHSKKLNYTNTPQGHKVTLKALGGTTAPEIDKTELVEVTEYLVVHLKGPLQKGTMYEMNSTFQGELADDLAGFYRSEYMDGNIKKVLATTQMQSADARKSFPCFDEPAMKARFNITLIHPNNLTALSNMLPKGESVPFNEDPAWNVTEFQTTPVMSTYLLAYIVSEFTYVHTNEKDVLIRIWARPSATEAGHGQYALNVTGLILSFFAEHYNTPYPLKKSDQIGLPDFNAGAMENWGLVTYRENSLLFDPKSSSSSNKERVVTVIAHELAHQWFGN…
45	Miniopterus schreibersii	Chiroptera	M.sch	GCA_964146895.1	MAKGFYISKGLGILGIVLGVAAVCTIVALSVVYAQEKNKNAEVSAGSPTTAAPSGTTTATTTATTTLDQSKPWNRYRLPKSLVPDSYQVKLRPHLTPNGQGLYIFEGWSTVHFMCEEPTSTIIIHSKKLNYTNTPQGHKVTLKALGGTTAPEIEKTELVEVTEYLVVHLKGPLQKGTMYEMNSTFQGELADDLAGFYRSEYMDGNIKKVLATTQMQSADARKSFPCFDEPAMKARFNITLIHPNNLTALSNMLPKGESVPFNEDPTWNVTEFQTTPVMSTYLLAYIVSEFTYVQTNEKDVLIRIWARPSATEAGHGQYALNVTGLILSFFAEHYNTPYPLKKSDQIGLPDFNAGAMENWGLVTYRENSLLFDPKSSSSSNKERVVTVIAHELAHQWFGN…
46	Mus musculus	Rodentia	M.mus	GCF_000001635.27	MAKGFYISKTLGILGILLGVAAVCTIIALSVVYAQEKNRNAENSATAPTLPGSTSATTATTTPAVDESKPWNQYRLPKTLIPDSYRVILRPYLTPNNQGLYIFQGNSTVRFTCNQTTDVIIIHSKKLNYTLKGNHRVVLRTLDGTPAPNIDKTELVERTEYLVVHLQGSLVEGRQYEMDSQFQGELADDLAGFYRSEYMEGDVKKVVATTQMQAADARKSFPCFDEPAMKAMFNITLIYPNNLIALSNMLPKGEPGSKPYPEDPSCTMTEFHSTPKMSTYLLAYIVSEFKNISSVSANGVQIGIWARPSAIDEGQGDYALNVTGPILNFFAQHYNTSYPLPKSDQIALPDFNAGAMENWGLVTYRESSLVFDSQSSSISNKERVVTVIAHELAHQWFGN…
47	Mustela erminea	Carnivora	M.erm	GCF_009829155.1	MAKGFYISKALGILFIILGVAAACTIIALSVVYAQEKNKNTGSSADGSTASPTSPTNPVNPTAPTTTGSTTAATTLDQSKPWNRYRLPKALIPSSYNVKLQPYLTPNSDGLYTFSGKSTVRFLCNESTSVIIIHSKKLNYTNIQGQRVALRGVGGIQAPAIDRTELVELTEYLVVHLREPLQVNSQYEMDSEFQGELADDLAGFYRSEYMENGVKKVIATTQMQAADARKSFPCFDEPAMKATFNITLIHPSNLVALSNMLPRGPSVPLPEDPSWSVTEFETTPIMSTYLLAYIVSEFKNLERIAPSGVLIRIWARPSAIDEGHGNYSLDVTGPILDFFSAHYNTPYPLKKSDQIALPDFNAGAMENWGLVTYRESALLYDPLSSSTGNRERVATVIAH…
48	Mustela lutreola	Carnivora	M.lut	GCF_030435805.1	MAKGFYISKALGILFIILGVAAACTIIALSVVYAQEKNKNTGSSADGSTASPTSPTSPTNPTSPTSPTSPTSPTSPMNPTAPTTTGSTTAATTLDQSKPWNRYRLPKALIPSSYNVVLRPYLTPNSDGLYTFSGNSTVRFLCNEPTNVIIIHSKKLNYTNIEGQRVALRGVGGIQAPAIDRTELVELTEYLVVHLREPLQVNSQYEMDSKFQGELADDLAGFYRSEYMENGVKKVIATTQMQAADARKSFPCFDEPAMKATFNITLIHPSNLVALSNMLPRGPSVPLPEDPSWNVTEFETTPIMSTYLLAYIVSEFKNLERIAPSGVLIRIWARPSAIDEGHGNYSLDVTGPILDFFSAHYNTSYPLSKSDQIALPDFNAGAMENWGLVTYRESALLYD…
49	Mustela putorius furo	Carnivora	M.put	GCF_011764305.1	MAKGFYISKALGILFIILGVAAACTIIALSVVYAQEKNKNTGSSADGSTASPTSPTNPMNPTAPTTTGSTTAATTLDQSKPWNRYRLPKALIPSSYNVVLRPYLTPNRDGLYTFSGKSTVRFLCNEPTNVIIIHSKKLNYTNIKGQRVALRGVGGIQAPAIDRTELVELTEYLVVHLREPLQVNSQYEMDSEFQGELADDLAGFYRSEYMENGVKKVIATTQMQAADARKSFPCFDEPAMKATFNITLIHPSNLVALSNMLPRGPSVPFPEDPSWNVTEFETTPIMSTYLLAYIVSEFKNLERIAPNGVLIRIWARPSAIDEGHGNYSLDVTGPILDFFSAHYNTSYPLSKSDQIALPDFNAGAMENWGLVTYRESALLYDPLSSSTGNRERVATVIAH…
50	Myotis daubentonii	Chiroptera	M.dau	GCF_963259705.1	MAKGFYISKALGILGIVLGVAAACTIIALSVVYAQEKDKNAELSAQVTTTLPTTDQNKPTVTTPTTTLDQSKPWNRYRLPRSLVPDSYQVTLRPYLTPNQHGLYIFEGSSTVHFTCQEPTNVIIIHSKKLNYTDIQGHRVALQALGGAKAPEIDRTELVEVTEYLVVHLKSQLEAGVMYEMSSKFQGELADDLAGFYRSEYMDGNEKKVLATTQMQSADARKSFPCFDEPAMKARFNITLIHPHNLTALSNMLPTGPSTPLQSDPTWHVTKFHTTPVMSTYLLAYIVSEFTYVNMTEAMSTNQNVLIRIWARPSATAAGHGQYALNVTGRILNFFAQHYNTPYPLDKSDQIGLPDFNAGAMENWGLVTYRENSLLFDPDSSSSSNKERVVTVIAHELAH…
51	Myotis ricketti	Chiroptera	M.ric	GCA_036010255.1	MAKGFYISKALGILGIILGVAAACTIIALSVVYAQEKNKNAELSAQVTTTLPTTTSDQNKPTVTTLSTTTLDQSKPWNRYRLPRSLVPDSYQVTLRPYLTTNEHGLYIFEGSSTVRFTCQEPTDVIIIHSKKLNYTDIQGHRVALQALGGAKAPEIDRTELVEVTEYLVVHLKSQLEAGVMYEMSSKFQGELADDLAGFYRSEYMDGNDKKVLATTQMQSADARKSFPCFDEPAMKARFNITLIHPHNLTALSNMLPKGPSTPLQGDPTWHVTEFHTTPVMSTYLLAYIVSEFTYVNMTEAMSTNQNVLIRIWARPSATAAGHGQYALNVTGRILNFFAQHYNTPYPLDKSDQIGLPDFNAGAMENWGLVTYRENSLLFDPDSSSSSNKERVVTVIAHE…
52	Neomonachus schauinslandi	Carnivora	N.sch	GCF_002201575.2	MAKGFYISKALGIPVIILGVAAVCTIIALSVVYAQEKNKNTGSSTAVPTKPTATAATTTATTLDQSKPWNRYRLPKTLIPSSYNVTLKPYLTPNSEGLYTFHGTSTVRFTCSEPTNVIIIHSNKLNYTNNQGQRVALRGVGGTRAPAIDTTELVELTEYLVVHLREPLQVNGQYEMDSEFQGELADDLAGFYRSEYIENGVKKVLATTQMQATHARKSFPCFDEPAMKATFNITLIHPHNLVALSNMLPRGPSVPLSGDSTWNVTEFETTPVMSTYLLAYIVSEFKHVETRTPSDVLIRIWARPSGIDQGHGNYALNVTGPILDFFSAHYDTPYPLNKSDQIALPDFNAGAMENWGLVTYRENSLLFDPQSSSSSNRERVATVIAHELAHQWFGNLVTL…
53	Neophocaena asiaeorientalis	Cetacea	N.asi	GCF_003031525.2	MAKGFYISKALGILGILLGVAAIATIIALSVLYAQEKNQNAGYATTVAPMSSVAPTSSATPTSPATSLTTTITTATTLDQSKPWNRYRLPTTLLPDSYDVTLRPYLTPNKNGLYIFEGRSIVRFICKVPTDVIIIHSKKLNYTTTQGHMVALRGVGASSAPDIDRTELVEPTEYLVVHLKGSLEAGRMYEMESTFQGELADDLAGFYRSEYMEGNVKKVLATTQMQSTDARKSFPCFDEPAMKATFNITLIHPNGFTALSNMPPKGPSVPLVEDPNWNVTEFKTTPVMSTYLLAYIVCEFTSVEKTEPNNVQVRIWARPNAIAENHGSYALNVTGPILNFFAKHFDTPYPLPKSDQVALPDFNAGAMENWGLVTYRENSLLFDPQASSSSNKERVVTVI…
54	Neovison vison	Carnivora	N.vis	GCF_020171115.1	MAKGFYISKALGILFIILGVAAACTIIALSVVYAQEKNKNIGSSADGSTASPTAPTSPTNPMNPTAPTATGSTTAATTLDQSKPWNRYRLPKALIPSSYNVMLRPYLTPNNDGLYTFSGKSTVRFLCTESTNVIIIHSKKLNYTNIQGHRVALKGVGGIQAPAIDRTELVELTEYLVVHLREPLQVNSQYEMDSEFQGELADDLAGFYRSEYMENGVKKVIATTQMQAADARKSFPCFDEPAMKATFNITLIHPSNLVALSNMLPRGPSVPFPEDPSWSVTEFETTPIMSTYLLAYIVSEFKSLERLAPSGVLIRIWARPSAINESHGNYALNVTGPILDFFSAHYDTPYPLKKSDQIALPDFNAGAMENWGLVTYRESALLYDPLSSSTGNRERVATV…
55	Nomascus leucogenys	Primates	N.leu	GCF_006542625.1	MAKGFYISKSLGILGILLGVAAVCTIIALSVVYSQEKNKNANSSPEASTTPSTSATTNPTSATTLDQSKPWNRYRLPNTLKPDSYQVTLRPYLTPDDRGLYVFKGSSTVRFTCTEATDVIIIHSKKLNYTLSQGHRVVLRGVGGSQPPDIDRTELVELTEYLVVHLKGSLVKDSQYEMDSEFEGELADDLAGFYRSEYTEGNVKKVVATTQMQAADARKSFPCFDEPAMKAEFNITLIHPKDLTALSNMLPKGPSTPLPEDPDWNVTEFHTTPRMSTYLLAFIVSEFDHVERQASNDVLIRIWARPSAIAAGHGDYALNVTGPILNFFAGHYDTPYPLPKSDQIGLPDFNAGAMENWGLVTYRENSLLFDPLSSSSSNKERVVTVIAHELAHQWFGNLV…
56	Odocoileus virginianus texanus	Artiodactyla	O.vir	GCF_002102435.1	MAKGFFISKALGILAILLGVAAVATIIALSVVYAQEKNKNAECGTAAPTSPTGPTTTSATTVDQSKPWNRYRLPTTLLPDSYRVTLRPYLTPNENGLYIFTGSSAVRFTCKESTDVIIIHSKKLNYTSRDGHLVALTGVGDAQAPEIDRTELVLITEYLVVHLKSSLEVGKMYEMETAFQGELADDLAGFYRSEYMDGNVKKVLATTQMQSTDARKSFPCFDEPAMKATFNITIIHPKELTALSNMPPKGPSVPLDGEPDWTVTEFQTTPVMSTYLLAYIVSEFTSVESVEPSGVEIRIWARPKATTDNHGLYALNVTGPILSFFASHYNTAYPLPKSDQIALPDFNAGAMENWGLVTYRENALLYDPQSSSSSNKERVVTVIAHELAHQWFGNLVTLA…
57	Orcinus orca	Cetacea	O.orc	GCF_937001465.1	MAKGFYISKALGILGILLGVAAIATIIALSVLYAQEKNQNAGYATTMAPTSSVAPTSSVAPTSSMAPTSPATSLTTTITAATTLDQSKPWNRYRLPTTLLPDSYKVTLRPYLTPNENGLYIFTGTSIVRFICKAPTDVIIIHSKKLNYTTTQGHMVALRGVGAFSAPDIARTELVEPTEYLVVHLKGSLEAGRMYEMESAFQGELADDLAGFYRSEYMEGNVKKVLATTQMQSTDARKSFPCFDEPAMKATFNITLIHPNGFTALSNMPPKGPSVPLVEDPKWNVTEFETTPVMSTYLLAYIVCEFTSVETMAPNNVQVRIWARPNAIAENHGNYALNVTGPILDFFASHFATPYPLPKSDQVALPDFNAGAMENWGLVTYRENSLLFDPQASSSSNKE…
58	Ovis aries	Artiodactyla	O.ari	GCF_016772045.2	MAKGFYISKALGILAILLGVAAVATIIALSVVYAQEKNKNAECGTSPTSPTSPTGPTSPTTTSATTVDQSKPWNRYRLPTTLLPDSYRVTLRPYLTPDENGLYIFTGSSTVRFACKESTDVIIIHSKKLNYTTTNGHLVVLRGVGGAQAPEIDRTELVLLTEYLVVHLKSPLEAGKMYEMETTFQGELADDLAGFYRSEYMDGDVKKVLATTQMQSTDARKSFPCFDEPAMKATFNITLIHPKELTALSNMPPKGPSVPLEGEPNWNVTEFETTPVMSTYLLAYIVSEFTSVESQAPNGVQIRIWARPKATTDRHGLYALNVTGPILNFFANHYNTAYPLPKSDQIALPDFNAGAMENWGLVTYRENALLYDPQSSSSSNKERVVTVIAHELAHQWFGN…
59	Pan troglodytes	Primates	P.tro	GCF_028858775.2	MAKGFYISKSLGILGILLGVAAVCTIIALSVVYSQEKNKNANSSPVASTTPSASATTNPASATTLDQSKAWNRYRLPNTLKPDSYQVTLRPYLTPNDRGLYVFKGSSTVRFTCKEATDVIIIHSKKLNYTLSQGHRVVLRGVGGSQPPDIDRTELVEPTEYLVVHLKGSLVKDSQYEMDSEFEGELADDLAGFYRSEYMEGNVRKVVATTQMQAADARKSFPCFDEPAMKAEFNITLIHPKDLTALSNMLPKGPSTPLPEDPNWSVTEFHTTPKMSTYLLAFIVSEFDYVEKQASNGVLIRIWARPSAIAVGHGDYALNVTGPILNFFAGHYDTPYPLPKSDQIGLPDFNAGAMENWGLVTYRENSLLFDPLSSSSSNKERVVTVIAHELAHQWFGNLV…
60	Panthera pardus	Carnivora	P.par	GCF_024362965.1	MAQGFYISKPVGILAILLGVAAVCTIIALSVVYSQEKNRSTESSTAASTAASTAASTAASTAASTAAPTGPTTTVATTLDQSKPWNVYRLPKTLIPDSYNVTLRPYLTPNDKGLYVFTGTSVVRFMCNESTSVVIIHSKRLNYTNHQGHMVSLSGVGGFQPQPVIVRTELVELTEYLVVHLQEPLVAGRQYEMKSEFQGELADDLAGFYRSEYMENGVKKVLATTHMQATEARKSFPCFDEPAMKATFNITIIHPNNLVALSNMLPRGPSVPFDGDPTWKVTEFETTPIMSTYLLAYIVSEFSYVETRAPSGVLIRIWARPGAINQGHGDYALKVTGPILDFFSQHYDTPYPLNKSDQIALPDFNAGAMENWGLVTYRESALLYDRRSSSSGNQERVVT…
61	Papio anubis	Primates	P.anu	GCF_008728515.1	MAKGFYISKSLGILGILLGVAAVCTIIALSVVYSQEKNKNAKSSLEASTTPSASATTSNPTLATTLDQSLLWNRYRLPNTLKPDSYQVTLRPYLTPDDRGLYIFKGSSTVRFTCKEATDVIIIHSKKLNYTLIQGHRVVLRGVGGSQPPDIDRTELVELTEYLVVHLRGSLVKDSQYEMDSEFEGELADDLKGFYRSEYMEGDVKKVVATTQMEAPDARKSFPCFDEPAMKAEFNITLIHPKDLTALSNMPPKGPSTPLPEDPNWNVTEFDTTPKMSTYLLAFIVSEFTYVEKPPSNGVSIRIWARPSAIAAGHGDYALNVTGPILNFFASHYDTPYPLPKSDQIGLPDFNAGAMENWGLVTYRENSLLFDPLSSSSSNKERVVTVIAHELAHQWFGNL…
62	Peromyscus leucopus	Rodentia	P.leu	GCF_004664715.2	MAKGFYISKTLGILGIVLGVAAVCTIIALSVVYAQEKNKNAENSATAPTLPATTSATTSATTSTTTSAVTSTATPGTTVDQSKPWNQYRLPRTLIPDSYRVTLRPYLTPNDQGLYIFEGNSTVRFTCQEATDVIIIHSKKLNYTLKGSHLVELRALGGPQAPGIISTELVERTEYLVVQLQGSLVKDQQYEMESQFRGELADDLAGFYRSEYVENGVKKVVATTQMQAADARKSFPCFDEPDMKAIFNITLIHPAGFTALSNMLPKDSSPLPGEPSWSVTEFNPTPKMSTYLLAYIVSEFKHIESKTSDGVQIRIWARPSAIDEGHGDYALNKTGPILSFFAQHYNTPYPLEKSDQIALPDFNAGAMENWGLVTYRENALLFDPQSSSIGNKERVVTVI…
63	Phascolarctos cinereus	Diprotodontia	P.cin	GCF_002099425.1	MAKGFFISKTLGIVGILFAVAAICTIITLSVLYSEEKNNNKQRLEKPTSQIPDTEATPAATAPTTLDPSLAWNRYRLPKSLIPDHYTVKLRPNLTTDDRGLYIFWGESTVRFLCKEETDVIIIHSNKLNYTMKDGYHVSLKGVNGSQPPQIDSTELVTTTQYLVVHLQSKLVVGHHYEMESTFVGELADDLAGFYRSEYTEDGVNKVLATTQMEAPYARKSFPCFDEPGMKATFDITLIHPSDHIAISNMPVKSSVKQDDNWNITQFDTTPRMSTYLLAYIVCQFEAAEEQGRDVQIRIWARPQAIEAGHGQYALNITGPILDFFADHYNTPYPLPKSDQVGLPDFSAGAMENWGLVTYRENSLLFDELSSSISNKERVVTVIAHELAHQWFGNLVTVE…
64	Physeter catodon	Cetacea	P.cat	GCF_002837175.3	MAKGFYISKALGILGILLGMAAIATIIALSVVYAQEKNKNAECATVALTSPATTLTTTITAATTTTATTTTITAATTTTATTTNITAATTITAATTLDQSKPWNRYRLPMTLLPDSYKVTLKPYLTPNENGLYIFKGTSIVRFICKNSTDVIIIHSKKLNYTTTQGHMVALRGVGAFQVPDIDRTELVEPTEYLVVHLKGFLEAGRMYEMESEFQGELADDLAGFYRSEYMEGNVKKVLATTQMQSTDARKSFPCFDEPAMKATFNITLIYPKGLTALSNMPPKGPSVLLEEDPNWSVTEFETTPVMSTYLLAYIVSEFTSVEAKAPNNVQVRIWARPNATAEGHGIYALNVTGPILNFFASHFETLYPLPKSDQVALPDFNAGAMENWGLVTYRENSL…
65	Piliocolobus tephrosceles	Primates	P.tep	GCF_002776525.5	MAKGFYISKSLGILGILLGVAALCTIIALSVVYSQEKNKNAKSSLETSTTPSASATTSNPTSATTNPTSASTSNPASATTLDQSVLWNRYRLPDTLKPDSYQVTLRPFLTPDNRGLYIFKGNSTVRFTCKEATDVIIIHSKKLNYTLNQGHMVVLRGVGGSQPPDIDRTELVETTEYLVVHLRGSLVKDSQYEMDSTFEGELADDLAGFYRSEYTEGNVKKVVATTQMQAADARKSFPCFDEPAMKAEFNITLIHPKDLTALSNMLPKGPSTPFPEDSDWNVTEFHTTPKMSTYLLAFIVSEFNYVEKQASNDVLIRIWARPSAIAAGHGDYALNVTGPILNFFAGHYDTPYPLPKSDQIGLPDFNAGAMENWGLVTYRENSLLFDPLSSSSSNKERVV…
66	Pipistrellus abramus	Chiroptera	P.abr	GCA_044885105.1	MAKGFYISRGVGVLGIVLGVAAICTVIALAVVYSQERNKNAEISAGAATTTTTTTTTTTTTGRPATTSPPTSTTTSRPTTATTSRPTATTTTPGTPTLDPTKPWNRYRLPRSLVPDSYQVTLRPHLVPNEHGLYVFEGNSTVHFTCREPTDVIIIHSKKLNYTDVQGHRVALRALGGAAPAPEIDRTELVEVTEYLVVHLRAPLQEGAMYEMSSTFQGELADDLAGFYRSEYMDGTQKKVLATTQMQSADARKSFPCFDEPAMKARFNITLIHPHNLTALSNMQPKGPSTPVPGEPEWSITEFKTTPVMSTYLLAYIVSEFTNGRDLPPSSLQIRIWARPSATAAGHGQYALNVTGKILNFFAQHYNTAYPLDKSDQIGLPDFNAGAMENWGLVTYREN…
67	Pipistrellus nathusii	Chiroptera	P.nat	GCA_963693515.1	MAKGFYISKGVGVLGIVLGVAAISTIIALSVVYSQEKNKNAESSAEAPTTTTTSMPTTTTTTTTTTSMPTTTTTTTTTSSRPGTTTGSPATTLDQTKPWNRYRLPRSLVPDSYQVTLRPFLVPNEHGLYLFNGSSSVHFTCRVPTDVIIIHSKKLNYTDIQGHRVVLRALGGDAQAPEIDRTELVEVTEYLVVHLKGPLQEGVMYEMNSTFQGELADDLAGFYRSEYMDGTQKKVLATTQMQSADARKSFPCFDEPAMKAKFNITLIHPHNLTALSNMLPKGPSVPLEGDPEWSVTEFQTTPVMSTYLLAYIVSEFTSVNTTEIMSTQQHVLIRIWARPSATEAGHGQYALNVTGSILNFFAQHYNTSYPLEKSDQIGLPDFNAGAMENWGLVTYRENS…
68	Pongo abelii	Primates	P.abe	GCF_028885655.2	MAKGFYISKSLGILGIILGVAAVCTIIALSVVYSQEKNKNANSSPEASTTPSASATTNPTSATTLDQSKAWNRYRLPNTLKPDSYQVTLRPYLTPNERGLYVFKGSSTVRFTCKEATDVIIIHSKKLNYTLSQEHRVVLRGVGGSQPPSIDKTELVEPTEYLVVHLKGSLVKDSQYEMDSEFEGELADDLAGFYRSEYMEGNVKKVVATTQMQAADARKSFPCFDEPAMKAEFNITIIHPKDLTALSNMLPKGPSTPLPEDPNWNVTEFQTTPKMSTYLLAFIVSEFDYVEKQAANDVLIRIWARPSAIAAGHGDYALNVTGPILNFFAGHYDTPYPLPKSDQIGLPDFNAGAMENWGLVTYRENSLLFDPLSSSSSNKERVVTVIAHELAHQWFGNLV…
69	Rhinolophus affinis	Chiroptera	R.aff	GCA_043728065.1	MAKPLVVLGILLGVAAASTIIALSVLYSQEKNKNAENSHGVAPTSPATTVSTTLDQSKPWNRYRLPRTLVPESYNVKLQPFLTPNNNGLYIFKGWSTVRFTCKEPTSVIIIHSKKLNYTTPNGHRVTLRGVGGSQPPAIDRTELVELTEYLVVHLNSDLQVGSVYEMDSEFEGELADDLAGFYRSEYMDGNVKKVLATTQMQSADARKSFPCFDEPAMKATFNITLIHPHNLTALSNMLPKGPSVPLPNDSTWNITEFHTTPVMSTYLLAYIVSEFTYVEQEAPNNVMIRIWARPSATAAGHGMYALNKTGPILNFFAQHYNTSYPLEKSDQIGLPDFNAGAMENWGLVTYRENSLLFDPQSSSISNQERVVTVIAHELAHQWFGNLVTVAWWNDLWLN…
70	Rhinolophus sinicus	Chiroptera	R.sin	GCA_036562045.1	MAKPLVVLGVLLGVAAVSTIIALSVLYSQEKNKNAASSPDVAPTSPATTVSTTLDQSKPWNQYRLPRTLVPESYNVKLQPFLTPDDNGLYIFKGWSTVRFTCNEPTRLIIIHSKKLNYTTPNGHRVTLRGVGGSQPPVIDRTELVELTEYLVVHLNGELQAGSVYEMDSEFVGELADDLAGFYRSEYMDGNVKKVLATTQMQSADARKSFPCFDEPAMKATFNITLIHPRDLTALSNMLPKGPSVPFPNDPSWSITEFHTTPVMSTYLLAYIVSEFTYVEQKSPNNVLIRIWARPSATAAGHGMYALNKTGPILNFFAQHYNTPYPLEKSDQIGLPDFNAGAMENWGLVTYRENSLLFDPQSSSSSNKERVVTVIAHELAHQWFGNLVTVAWWNDLWLN…
71	Rhinopithecus roxellana	Primates	R.rox	GCF_007565055.1	MAKGFYISKSLGILGILLGVAALCTIIALSVVYSQEKNKNAKSSLETSTTPSASATSSNPTSATTNPTSATNPTSATTNPTSATNPTSATTLDQSVLWNRYRLPNTLKPDSYQVTLRPYLTPDDRGLYIFKGSSTVRFTCKEATDVIIIHSKKLNYTLNQGHRVVLRGVGGSQPPDIDRTELVEPTEYLVVHLRGPLVKDSQYEMDSEFQGELADDLAGFYRSEYMEGNVKKVVATTQMQAADARKSFPCFDEPAMKAEFNITLIHPKDLIALSNTLPKGPSTPLPEDSNWNVTEFHTTPKMSTYLLAFIVSEFNYVQKQASNVLIRIWARPSAIAAGHGDYALNVTGPILNFFAGHYDTPYPLPKSDQIGLPDFNAGAMENWGLVTYRENSLLFDPLS…
72	Sapajus apella	Primates	S.ape	GCF_009761245.1	MAKGFYISKYLGIGGIALGVAALCTIIALSVVYAQEKNKNAESSLGAATTTTSASGATTTSTSATTTTSASGATTADQSKPWNRYRLPDTLKPDSYQVTLQPYLTPNDQGLYVFNGTSTVRFTCVVATDVIIIHSKKLNYTVVEGHRVVLRGVGGSQAPDIERTELVEPTEYLVVHLRSSLVKDSQYEMSSTFVGELADDLAGFYRSEYMDGNVKKVVATTQMQAADARKSFPCFDEPAMKAEFNITLIHPQNLTALSNMLPKGPSTPLPEDPNWMVTEFHPTPKMSTYLLAFIISEFTYVEKQASNGVLIRIWARPSAIAAGHGDYALNVTGPILNFFASHYNTSYPLPKSDQIGLPDFNAGAMENWGLVTYRENSLLFDPLSSSSSNKERVVTVIAH…
73	Sorex araneus	Veneroida	S.ara	GCF_027595985.1	MAGGFMISKPVGILCIILGVGALSTIIALSVVYSQEKSKNAERPNPTPTAPPASTTPDQKLPWNQYRLPKSLKPHSYKVSLRPFLTPNSQGLYVFTGSSTVRFECETATNVVIIHSKKLNYTKAPVLRAVDGSKAPEISRWEEVKLTEYLVLHLKDNLQKGKSYEMDTQFEGELADDLAGFYRSEYMDGGVKKVVATTQMQAADARKSFPCFDEPAMKAIFNITLTYPKELKALSNMLPKGERRRPLEGNASWSVTEFESTPVMSTYLLAYIVSEFESVNSISPENKIQIRIWGRPSAIKEGHGDYALNVTGRILDFFAKHYNTAYPLSKSDQIALPDFNAGAMENWGLVTYRENSLLFDPGTSSIGNKERVVTVIGHELAHQWFGNLVTVAWWNDLWL…
74	Theropithecus gelada	Rodentia	T.gel	GCF_003255815.1	MAKGFYISKSLGILGILLGVAAVCTIIALSVVYSQEKNKNAKSSLEASTTPSASATTSNPTLATTLDQSILWNRYRLPNTLKPDSYQVTLRPYLTPDDRGLYIFKGSSTVRFTCKEATDVIIIHSKKLNYTLIQGHRVVLRGVGGSQPPDIDRTELVELTEYLVVHLRGSLVKDSQYEMDSEFEGELADDLKGFYRSEYMEGDVKKVVATTQMEAPDARKSFPCFDEPAMKAEFNITLIHPKDLTALSNMPPKGPSTPLPEDPNWNVTEFDTTPKMSTYLLAFIVSEFTYVEKPPSNGVLIRIWARPSAIAAGHGDYALNVTGPILNFFASHYDTPYPLPKSDQIGLPDFNAGAMENWGLVTYRENSLLFDPLSSSSSNKERVVTVIAHELAHQWFGNL…
75	Tursiops truncatus	Cetacea	T.tru	GCF_011762595.1	MAKGFYISKALGILGILLGVAAIATIIALSVLYDQEKNQNAGYATTVAPTSPVTTITTATTLDQSKPWNRYRLPTTLLPDSYKVTLRPYLTPNENGLYIFTGTSIVRFICKAPTDVIIIHSKKLNYTTTQGHMVALRGVGGFSAPDIARTELVEPTEYLVVHLKGSLEAGRMYEMESAFQGELADDLAGFYRSEYMEGNVKKVLATTQMQSTDARKSFPCFDEPAMKATFNITLIYPNGFTALSNMPPKGPSVPFAEDPKWNVIEFETTPVMSTYLLAYIVCEFTSVKTMAPNNVQVGIWARPNAIAENHGNYALNVTGPILNFFAKHFDTPYPLPKSDQVALPDFNAGAMENWGLVTYRENSLLFDPQASSSSNKERVVTVIAHELAHQWFGNLVTLA…
76	Rattus norvegicus	Rodentia	R.nor	NP_032512.2	MAKGFYISKTLGILGILLGVAAVCTIIALSVVYAQEKNRNAENSATAPTLPGSTSATTATTTPAVDESKPWNQYRLPKTLIPDSYRVILRPYLTPNNQGLYIFQGNSTVRFTCNQTTDVIIIHSKKLNYTLKGNHRVVLRTLDGTPAPNIDKTELVERTEYLVVHLQGSLVEGRQYEMDSQFQGELADDLAGFYRSEYMEGDVKKVVATTQMQAADARKSFPCFDEPAMKAMFNITLIYPNNLIALSNMLPKESKPYPEDPSCTMTEFHSTPKMSTYLLAYIVSEFKNISSVSANGVQIGIWARPSAIDEGQGDYALNVTGPILNFFAQHYNTSYPLPKSDQIALPDFNAGAMENWGLVTYRESSLVFDSQSSSISNKERVVTVIAHELAHQWFGNLVT…
77	Oryctolagus cuniculus	Lagomorpha	O.cun	NP_001075795.1	MAKGFYISKSLGILGILLGVAALCTIVALSVVYRQEKNKNTSQSPSMAPLNPTATSSPATTLDQNLPWNRYRLPKTLIPDSYNVVLRPYLSPNSQGLYIFTGSSTVRFTCQEATNVIIIHSKKLNYTITQGHRVVLRGVRGSQPPAIASTELVELTEYLVVHLQGQLVAGSQYEMDTQFQGELADDLAGFYRSEYMEGNVRKVVATTQMQAADARKSFPCFDEPAMKATFNITPIHPRDYTALSNMLPRSSTALPEDPNWTVTEFHTTPKMSTYLLAYIVSEFTNIEAQSPNNVQIRIWARPSAISEGHGQYALNVTGPILNFFANHYNTPYPLEKSDQIGLPDFNAGAMENWGLVTYRESALLFDPLVSSISNKERVVTVVAHELAHQWFGNLVTVDW…
78	Ursus arctos horribilis	Carnivora	U.arc	GCF_003584765.2	MAKGFYISKPLGILVIILGVAAVCTIIALSVVYAQEKNKNTGSSTESPTATATTTAATTLDQSKPWNRYRLPKTLIPSSYNVTLRPNLTPNSEGLYIFSGNSTVRFRCNESTNVIIIHSKSLNYTNIEGQRVALRGVGGSQAPAIDSTELVELTEYLVVHLREPLQVNSEYEMDSEFQGELADDLVGFYRSEYVENDVKKVLATTQMQATGARKSFPCFDEPAMKATFNITLIHPTNLVALSNMLPRGPTVPVTGDPNWSITEFETTPIMSTYLLAYIVSEFKNVETRAPSGILIRIWARPGAIDEGHGSYALNVTGPILDFFSAHYDTPYPLNKSDQVALPDFSAGAMENWGLVTYRENALLYDLQSSSTSNQERVVTVIAHELAHQWFGNLVTLEWW…
79	Vicugna pacos	Artiodactyla	V.pac	GCF_000164845.4	MGKGFYISKALGILGILLGVAAVATIIALSVVYAQEKNKNAKCATVAPSTTPSTTPSTSSATTLDQSKPWNQYRLPTTLLPDSYNVKLRPYLTPNDQGLYIFKGTSTVRFICKEPTNVIIIHSKKLNYTTTQEHMVVLRGVGGSQAPSIDRTELVELTQYLVVHLKSSLEAGGMYEMDTEFEGELADDLAGFYRSEYMEGNVKKVLATTQMQAPDARKSFPCFDEPAMKATFNITLIHPKDLTALSNMLPKGPSVPLEGDPNWNVTEFETTPKMSTYLLAFIVSEFTCVEGKSANDVLIRIWARPNATAEGHGIYALNKTGPILDFFAHHYATSYPLPKSDQIALPDFNAGAMENWGLVTYRENALLFDPLSSSISNKERVVTVIAHELAHQWFGNLVT…
80	Zalophus californianus	Carnivora	Z.cal	GCF_009762305.2	MAKGFYISKTLGILVIILGVAAVCTIIALSVVYAEEKNKNTGSSTEGSTAGPTAGPTKPMTTTATTTATTLDQSKPWNHYRLPKTLIPSSYNVTLQPYLTPNSEGLYTFHGTSTVRFMCNESTNVIIIHSKKLNYTDMQGQRVALRGVGGTQTPTIDTTELVELTEYLVVHLREPLQVNGQYEMDSSFHGELADDLAGFYRSEYTENGVKKVLATTQMQATHARKSFPCFDEPAMKATFNITLIHPVNFVALSNMLPRGPSVPLLGDGNWRVTEFETTPVMSTYLLAYIVSEFKNVETIAPSGVLIRIWARPSGIDQGHGKYALNVTGPILDFFSIHYDTPYPLNKSDQVALPDFNAGAMENWGLVTYRENSLLYDPQSSSSGNQERVATVIAHELAHQ…
81	Apodemus sylvaticus	Rodentia	A.syl	XP_052016126.1	MAKGFYISKTLGILGILLGVAAVCTIIALSVVYAQEKNRNAENSATDPTLPSSTSASASTAAPPIDESKPWNQYRLPKSLIPDSYSVTLRPYLSPNDQGLYIFTGNSTVRFTCNETTDVIIIHSKKLNYTLKDGHMVALQALGDTQAPTIVNTELVERTEYLVVHLQGSLVKGQQYEMHSEFQGELADDLAGFYRSEYTEGDTKKVVATTQMQAADARKSFPCFDEPAMKAVFNITLIYPKNLTALSNMLPKDSKPLEGEPDWTVTEFYSTPKMSTYLLAYIVSEFKNISSTSENGVQIGIWARPSAIDEGHGDYALNVTGPILNFFAQHYNTPYPLPKSDQIALPDFNAGAMENWGLVTYRESNLAFDPLSSSISNKERVVTVIAHELAHQWFGNLVT…
82	Suncus etruscus	Insectivora	S.etr	XP_049639894.1	MAKGFFISKTVGILGIILGLAAVSTIIALSVVYSQEKNKNNAESNTVPPTNVPPTAATTPDPNLPWNKYRLPDSLFPHSYSVQLRPFLTPNNQGLYVFEGSSTARFVCLKATDKVIIHSKKLNYTTAPVLRSVDGAQAPAIERWQLVELTEYLVLHLKESLQQGKTYDLDTKFVGELADDLAGFYRSEYMDNGVKKVVATTQMQAADARKSFPCFDEPAMKAIFNISLIYPKEYHALSNMPPKGPDTEYSKDPNWRVIEFQTTPKMSTYLLAYIVSQFDSEKAETANKVQIKIWARPSAVQAGHAQYALKVTGPILDFFARHYNTAYPLSKSDQIGLPDFNAGAMENWGLVTYRENSLLFDPYSSSIGNKERVVTVIAHELAHQWFGNLVTVAWWNDLW…
83	Tadarida brasiliensis	Chiroptera	T.bra	GCA_030848825.1	MAKGFYISKGLGILGIVLGVAAVCTIVALSVVYAQEKNKNAESANQAPSSTAATSTATTSTAATTLDQSKPWNRYRLPKALVPDSYQVTLRPYLTPNKNGLYIFEGSSSVHFRCNETTNLIIIHSKKLNYTTTSQGHMVALRTLEGAKAPDIDKTELVEVTEYLVVHLKGNLQVGSLYEMNTTFTGELADDLAGFYRSEYMDGNIKKVLATTQMQSADARKSFPCFDEPAMKARFNITLIHPSNLTALSNMLPKGPSVPFEGNAAWNITEFQTTPVMSTYLLAYIVSEFTHVEEMNPTNSKVLIRIWSRPSATNEGHGAYALNVTGPILRFFEQHYNTPYPLPKSDQIGLPDFNAGAMENWGLVTYRENSLLFDPKSSSSSNKERVVTVIAHELAHQWF…
84	Cervus elaphus hippelaphus	Artiodactyla	C.ela	OWK08899.1	MAKGFFISKALGILAILLGVAAVATIIALSVVYAQEKNKNAERGTAAPTSPTSPTTTSATTLDQSKPWNRYRLPTTLLPDSYRVTLRPYLTPNENGLYIFTGSSTVRFICKESTDVIIIHSKKLNYTSQDGHLVVLRGVGGAQAPEIDRTELVLITEYLVVHLKSSLEAGKMYEMETTFQGELADDLAGFYRSEYMDDNVKKVLATTQMQSTDARKSFPCFDEPAMKATFNITIIHPKELTALSNMPPKGPSVPLEGEPDWNVTEFQTTPVMSTYLLAYIVSEFTSVESVEPSGVQIRIWARPKATADNHGLYALNVTGPILSFFASHYNTAYPLPKSDQIALPDFNAGAMENWGLVTYRENALLYDPQSSSSSNKERVVTVIAHELAHQWFGNLVTLA…
85	Canis lupus familiaris	Carnivora	C.lup	NP_001139506.1	MAKGFYISKALGILAIVLGIAAVSTIIALSVVYAQEKNKNAESSPVSSPVSSPVSSPVSPTNPSTTAATTLAQSKPWNHYRLPKTLIPSSYNVTLRPYLTPNSNGLYTFKGSSTVRFTCKESTSMIIIHSKKLNYTNIQGQRVALRGVGGSQAPAIDRTELVEVTEYLVVHLREPLQVNSQYEMDSKFEGELADDLAGFYRSEYTENGVKKVLATTQMQAADARKSFPCFDEPAMKATFNITLIHPSNLVALSNMLPRGPSVPFTEEPNWNVTEFETTPIMSTYLLAYIVSEFKNVQENTPSNVLIRIWARPSAMDQGHGNYALRVTGPILDFFSRHYDTPYPLNKSDQIALPDFNAGAMENWGLVTYRESALLYDPQSSSIGNKERVVTVIAHELAHQ…
86	Nyctereutes procyonoides	Carnivora	N.pro	XP_055182557.1	MAKGFYISKALGILAIVLGIVAVSTIIALSVVYAQEKNKNTESSPVSSPVSPTNPSTTAATTLDQSKPWNRYRLPKTLIPSSYNVTLRPYLTPNSNGLYTFKGSSTVRFRCKESTSMIIIHSKKLNYTNIQGQRVALRGVGGSQAPAIDRTELVEVTEYLVVHLREPLQVNSQYEMDSKFEGELADDLAGFYRSEYTENGVKKVLATTQMQAADARKSFPCFDEPAMKATFNITLIHPSNLVALSNMLPRGPSVPLTGEPNWSVTEFETTPIMSTYLLAYIVSEFKNVQENTPSNVLIRIWARPSAIDQGHGNYSLGVTGPILDFFSRHYDTPYPLNKSDQIALPDFNAGAMENWGLVTYRESALLYDPQSSSIGNKERVVTVIAHELAHQWFGNLVTL…
87	Sciurus carolinensis	Rodentia	S.sar	MBZ3880029.1	MAKGFYISKSLGVLGILLGVAALCTIIALSVVYAQEKNRNVETFTVATEVPEIPEVPVLSTAILATTVNQSIPWNQYRLPKSLMPDSYQVKLRPYFTPNDKGLYIFEGTSTVRFTCKEATNVIIIHSKKLNYTRTQGHMVVLRGVNGSETPAIDRTELVEPTEYLVVHLRDYLLEGSQYEMDTVFQGELADDLAGFYRSEYMDGNVKKVVATTQMQAADARKSFPCFDEPAMKATFSITLIHPKDLVALSNMLPKGPSVPLDGDPEWLITEFHPTPRMSTYLLAYIVSEFKSVETRSPNNVLIRIWARPNAIEEGHGEYALHVTGPILNFFAEHYDTPYPLEKSDQIGLPDFNAGAMENWGLVTYRENSLLYDPLFSSSGNKERVVTVIAHELAHQWFG…
88	Cavia porcellus	Rodentia	C.por	XP_013014240.1	MAKGFYISKSLGILGILLGVAAICTIVALSVVYAQEKNRNAENSAADSASSTTTTTAPATTVDESKPWNRYRLPTSLVPISYQVTLRPYFTPNAHGLYIFEGKSTVRFSCQEATNMIIIHSKKLNYTTQSSTGQRVALRSVDGSQPPAIDRTELVERTEYLVVHLQGHLSVGREYEMDSQFQGELADDLAGFYRSEYRENGQLKVVATTQMQAADARKSFPCFDEPAMKATFDITLIHPAHYQALSNMLPKGPSVPYPGDSSLVITEFKTTPKMSTYLLAYIISEFHSVESKSPDNVMIRIWARPSAIAEGHAEYALNVTGPILSFFGKHYDTPYPLEKSDQIGLPDFNAGAMENWGLVTYRENSLLFDPESSSISNQERVVTVVAHELAHQWFGNLVT…
89	Plecotus auritus	Chiroptera	P.aur	GCA_963455305.1	MAKGFYISKALGILGIVLGVAAACTIIALSVVYAQEKNKNAESSAQVPTPTTTTMPTTTLDQSKPWNRYRLPKSLVPDSYQVTLRPYLATTENGLYIFKGSSTVRFTCREPTSIIIIHSKKLNYTNTPQGHRVALLALGGSKAPEIDRTELVEVTEYLVVHLKGPLEVGVMYEMSSTFQGELADDLAGFYRSEYMDGDVKKVLATTQMQSADARKSFPCFDEPAMKARFNITLIHPNNLTALSNMLPKGPSVPLQGDPTWAVTEFHTTPVMSTYLLAYIVSEFTYVNMTETMSTNQEVLIRIWARPSATAAGHGQYALNVTGRILNFFAQHYNTPYPLDKSDQIGLPDFNAGAMENWGLVTYRENSLLFDPASSSSSNKERVVTVIAHELAHQWFGNLV…
90	Vespertilio murinus	Chiroptera	V.mur	GCA_963924695.2	MAKGFYISKGVGVLGIVLGIAAICTIVALSVVYSQEKNKNAESSAGASTTTASPDATATTTGRPATTLDQSVPWNRYRLPRSLVPDSYQVTLRPFLQPNEHGLYVFTGSSSVRFTCREPTDLIIIHSKKLNYTDTQGQRVALRALGGAAPAPAIDRTQLVEATEYLVVHLRSPLEAGVMYEMNSTFQGELADDLAGFYRSEYMDGTQKKVLATTQMQSADARKSFPCFDEPAMKARFNITLIHPSNLTALSNMLPKGPSVPFAGDPTWSVTEFHTTPVMSTYLLAYIVSEFTNVSRTETMSTGQQIRIWARPSATAAGHGDYALNVTGPILNFFAQHYNTAYPLDKSDQIGLPDFNAGAMENWGLVTYRENSLLFDPESSSSSNKERVVTVIAHELAHQ…
91	Hipposideros larvatus	Chiroptera	H.lar	GCA_031876335.1	MAKGFYISKPLGILGIVLGVAAVCTIIALSVVYDQEKNKNAESSAGAPTSPAATGAPTSPAATGAPTSPAATGAPTSPAATGAPTSPAATGAPASPATTVTTTLDQSKPWNRYRLPKSLVPDSYNVKLRPFLTPNQDGLYTFSGSSTVRFTCKEPTDVIIIHSKKLNYTKTSDDHMVTLRGVGGSQPPAISHTELVEVTEYLVVHLKSQLEVNSMYEMDSEFVGELADDLAGFYRSEYMDDGVKKVLATTQMQSADARKSFPCFDEPAMKATFNITLIHPNNLTALSNMLPKGPSVPFSEDPTWNVTEFDTTPVMSTYLLAYIVSEFTAVEKTAPNNVLIRIWARPSATKEGHGIYALNKTGLILNFFAEHYNTSYPLTKSDQIGLPDFNAGAMENWGL…
92	Vulpes vulpes	Carnivora	V.vul	XP_025856768.1	MAKGFYISKALGILAIVLGIAAVSTIIALSVVYAQEKNKNTESSPVSSPVSPTNPSTTAATTLDQSKPWNHYRLPKTLIPSSYNVTLRPYLTPNSNGLYTFKGSSTVRFRCKESTSMIIIHSKKLNYTSIQGQRVALRGVGGSQAPAIDRTELVEVTEYL VVHLREPLQVNSQYEMDSEFEGELADDLAGFYRSEYTENGVKKVLATTQMQAADARKS FPCFDEPAMKATFNITLIHPSNLVALSNMPPRGPSVPLNGEPNWSVTEFETTPIMSTY LLAYIVSEFKNVQENTPSNILIRIWARPSAIDQGHGNYSLGVTGPILDFFSRHYDTPY PLKKSDQIALPDFNAGAMENWGLVTYRESALLYDPQSSSIGNKERVVTVIAHELAHQW FG…
93	Passer montanus	Aves	P.mon	XP_039579479.1	MAGGFFISKTVGIVAIVLGLGAVATIIALSVVYAQEKNKGTSDVGSNTTASPDTSTTTPAPNNPWNRWRL PTTLKPEFYEVSLQPFLKPDANNMYIFKGNSSVVFLCEEATNLILIHSKKLSYTMQGSFHATLKAEGDGS APAISSTWLENTTQYLVVQLEAPLQQGQRYRLSSNFTGELADDLAGFYRSEYTDESGIKQVVATTQMQAA DARKAFPCFDEPAMKANFSVTLIHPSGYKAISNMPAKNTSELEIDGEIWNVTEFYTTPRMSTYLLAFIVS QFTSVDNSSEGTLIRIWGRPKAIDEGQGDYALNVTGPILSFFEKHYNTAYPLPKSDQVGLPDFNAGAMEN WGLVTYRENSLLFDANYSSIGNKERVVTVIAHELAHQWFGNLVT…
94	Craseonycteris thonglongyai	Chiroptera	C.tho	GCA_004027555.1	MAKGFYISKSLGVLGILLCVAAACTIIALSVVYSQEKNKNAKSSAEAPTSPSTTVSTTLDQNKPWNRYRLPPTLMPDSYNVTLRPYLTRNDRDLYIFKGKSTVRFICKESTDVIIIHSKKLNYTMTPEGHRVVLRGVGGSKPPAIDRTELVEPTEYLVVHLKGRLEVNGMYEMDSEFEGELADDLAGFYRSEYMDGNVKKVLATTQMQSADARKSFPCFDEPAMKAKFNITLIHPSNLTALSNMQPTGPSVPFPEDPTWSITTFQTTPIMSTYLLAYIVSEFTCVNTTTPDKILIRIWARPSATMEGHGDYALNKTGLILNFFAGHYNTTYPLDKSDQIALPDFNAGAMENWGLVTYRENSLLFDPKSSSSSNKERVVTVIAHELAHQWFGNLVTVAWW…
95	Rousettus leschenaultii	Chiroptera	R.les	GCA_015472975.1	MAKGFYISKSLGILAILLGVAAVCTIIALSIVYAQEKNRNVESSSQAPTSLSTTVATTLDQSKAWNQYRLPQTLMPESYQVTLRPYLTPNEEGLYIFKGSSTVRFICKEPTDVIIIHSKKLNYTTTQGHMVVLRGVGSSQAPAIDRTELVETTEYLVVHLKGSLEAESVYEMDSVFEGELADDLAGFYRSEYLDGNVKKVLATTQMQSTDARKSFPCFDEPAMKAKFNITLIHPSNLTALSNMLPKGPSVPLTEDPTWNVTEFHTTPVMSTYLLAYIVSEFTCVQETAENDVLIRIWSRPSATKENQGLYALNVTGPILNFFAQHYDTPYPLEKSDQIGLPDFNAGAMENWGLVTYRENSLLFDPLSSSTSNKERVVTVIAHELAHQWFGNLVTVAWWN…
96	Tenrec ecaudatus	Afrosoricida	T.eca	XP_075413562.1	MAKGFYISKPLGILGIVLGVAALSTIIALSVVYSQEKNKNAENSGPGHATTRPPSATTSTTTSATTSATTLNPNLPWNQYRLPTTLIPESYNVTLRPYLTPNNQGLYIFTGRSTVRFVCKKATNIIIIHSKKLNYTTEVVLRGLGGSQAPAIDRREMVAPTEYMVLHLKGSLVENSMYELDSQFEGELADDLAGFYRSEYMEGDVKKVVATTQMQAADARKSFPCFDEPAMKATFNITIIHPSKLTALSNMPPKGSVAFDEDANWNVTEFETTPIMSTYLLAYIVSEFTSVEQTTTNGIQIRIWARPNATTAGHSQYALKVTGPILDFFTQHYNTSYPLSKSDQIALPDFNAGAMENWGLVTYRESALLFDELSSSSSNKERVVTVIAHELAHQWFGNL…
97	Elephantulus edwardii	Macroscelidea	E.edw	XP_006885282.1	MAKGFYISKSLGILAIVLGVAAVCTISALSVVYSQEKQKNAENSRLEQSTLGPVSSTSAPVTTTTLDPNLPWNNYRLPLTLIPESYDLKLRPFLTPNSEGLYIFTGSSTVRFTCKNTTDVIIIHSKKLNYTADLVLRRVGGSQAPTIKRVEWVLHTEYMVVHLNSHLEVNGQYELQSQFVGELADDLAGFYRSEYMEGGVKKVLATTQMQAPDARKSFPCFDEPAMKATFNITLVHPKNLVALSNMQPKGPSTPFPEDPDWSITEFETTPKMSTYLLAFIVSEFTSVNSVTPSGIQIRIWARPSATREGHSHYAQTVTGPILEFFAQHYSTPYPLNKSDQIALPDFNAGAMENWGLVTYRESALLYDPQSSSIGNKERVVTVIAHELAHQWFGNLVTVA…
98	Echinops telfairi	Afrosoricida	E.tel	XP_012861931.1	MAKGFYISKPLGILGIVLGVAALCTIIALSVVYSQEKNKNAENSGPGHSTTSPTSAATSPTSATTLDPNQPWNQYRLPTTLIPESYSVTLRPYLTPNSQGLYVFTGRSTVRFVCKQATNLIIIHSKKLNYTTEVVLRGIGGSQAPAIDRRDMVALTEYMVLHLKESLVENNVYELDSQFVGELADDLAGFYRSEYMEGNVKKVVATTQMQAADARKSFPCFDEPAMKATFNITIIHPSNLTALSNMPPKGSFALTGEPGWNITEFETTPIMSTYLLAYIVSEFTSVEETSTNGVQIRIWARPNATLAGHSNYALRVTGPILDFFTQHYNTSYPLSKSDQIALPDFNAGAMENWGLVTYRESALLFDELSSSSSNKERVVTVIAHELAHQWFGNLVTVAW…
99	Atelerix albiventris	Erinaceomorpha	A.alb	GSA:CRR1001638	MAKGFFISKTVGILGIVLAVAAVSTIIALSVVYSQEKNKNTASSTTAAPSVTTSQATTLDQSKPWNRYRLPESLEPHSYSVVLRPYLDPNAQGLYIFEGNSTVRFICKSATNVIIIHSKKLNYTREPKVVLRGVDAQAPQIQNIELVGVTEYLVVHLKNNLEVSKTYEMDSTFRGELADDLAGFYRSEYMESNVKKVVATTQMQAADARKSFPCFDEPAMKAYFNITIIHPKNHTALSNMPPKGPSKPLPEDNNWLITEFETTPKMSTYLLAYIVSEFKEVNTVTPNDIQIRIWARPSAIDAGHGDYALKVTGPILTFFAQHYNTSYPLSKSDQIGLPDFNAGAMENWGLVTYRENALLFDNLTSSIGNQERVVTVIAHELAHQWFGNLVTIRWWNDLW…
100	Aquila chrysaetos	Accipitridae	A.chr		MAAGFFISKTVGIVAIVLALGAVATIIALSVVYAQEKNKVVDSGTTGTTTTTTTTTTTPSTTAALTTALTTTAAPTTTAAPHYPWNQWRLPTTLVPESYEVTLQPFLTPNADNMYIFRGNSSVVFVCKEATNLILIHSNKLNYTLQGSFYASLEPVDSSRAPLINNTWLEIPTQYLVVQLNGRLRQGRRYRLFTIFTGELADDLAGFYRSEYVDELGVKKVVATTQMQAADARKAFPCFDEPAMKANFTVTLIHPSDHSAISNMPAIKTRQQEIDGKSWNITEFGTTPKMSTYLLAFIVSQFSYVHMSSGDVQIRIWGRPKAIAEGQGSYALQVTGPILSFFEKHYNTAYPLPKADQVGLPDFNAGAMENWGLLTYRENSLLYDNAYSSIGNKERVLTV…
101	Anser cygnoides	Anatidae	A.cyg		MAAGFFISKAVGIAGIVLALGAVATIIALSVVYAQEKNKTSGSGGDTTTTTTTATITSLAPNTTAAPNNPWNRWRLPTTLKPELYEVTLQPFLKPDNNNMYIFKGNSSVTFLCEEATDLIIIHSNKLNYTLQGNFHTSLQAVNGSNAPAITQTWLETTTQYLVVQLAAPLQKGQSYRLFSIFTGELADDLAGFYRSEYVEGNVTKVVATTQMQAPDARKAFPCFDEPAMKANFTVTLIHPSDHKAISNMPTESTQQVQTGGESWNVTKFLTTPKMSTYLLAFIVSQFDYVYNDSGKVLIRIWGRPEAIKENQGAYALQVTGPILSFFEQHYNTPYPLPKSDQVGLPDFNAGAMENWGLVTYRENSLLFDDAYSSISNKERVVTVIAHELAHQWFGNLVT…
102	Anas platyrhynchos	Anatidae	A.pla		MAAGFFISKAVGVVCIVLAVGAVATIIALSVVYAQEKNKTASSGGDTNTNTTTTSAPTTAAPNNPWNRWRLPTTLKPELYDVTLQPFLTPDNNNMYIFKGNSSVTFTCEEPTDLIIIHSNKLNYTMQGGFHASLRAVGSTEVPTITKTWLETTTQYLVVQLGGMLTKGQSYVLSSIFTGELADDLAGFYRSEYVEGNVTKVVATTQMQAPDARKAFPCFDEPAMKANFTVTLIHPSDHEALSNMPVESTEEVQIDNESWNITRFATTPKMSTYLLAFIVSEFTEVSNNSEEVLIRIWGRPQAISEGQGAYALQVTGPILKFFEQHYNTAYPLPKSDQVALPDFNAGAMENWGLVTYRENSLLFDGNYSSVGNKERVVTVIAHELAHQWFGNLVTLRWWN…
103	Mareca penelope	Anatidae	M.pen		MAAGFFISKAVGVVCIVLAVGAVATIIALSVVYAQEKNKTASSGGDTNTTTTTTSAPTTAAPNNPWNRWRLPTTLKPELYDVTLQPFLTPDNNNMYIFQGNSSVTFTCEEPTDLIIIHSNKLNYTLQGGFHASLQAVGSPQAPAITNTWLETTTQYLVVQLDGMLTKGQSYVLSSIFTGELADDLAGFYRSEYVEDNVTKVVATTQMQAPDARKAFPCFDEPAMKANFTVTLIHPSDHKALSNMPVESTQKVQIGNESWNITRFATTPKMSTYLLAFIVSQFSEVSNNSDEVLIRIWGRPQAISEGQGAYALQVTGPILKFFEQHYNTAYPLPKSDQVALPDFNAGAMENWGLVTYRENSLLFDGNYSSVGNKERVVTVIAHELAHQWFGNLVTLRWWN…
104	Heliangelus exortis	Trochilidae	H.exo		MAAGFFISKSVGIVAIMLGLGAVATIIALSVVYAQEKDKHSHPSTDDTTTAAPPPTTAAPNNPWNRWRLPATLVPEYYQVTLQPFLTPDPSGTYIFKGNSSVVFICVEDTDLILIHSNKLNYTMQASFHASLEGVDGSTAPAIKTTWLETPTQYLVVQLEEPLREGQRYRLVSIFTGELADDLAGFYRSEYVDGSGVKRVVATTQMQAADARKAFPCFDEPAMKANFSVTLIHPSDHEAISNMPVKSTSRQEIDGQSWNITEFQRTPRMSTYLLAFIVSQFQSVHSMSGDVQIRIWGRPEAIGQGQGDYALNVTGPILNFYEGLYGEKFPLPKSDQVGLPDFNAGAMENWGLVTYRENSLLFDPSYSSIGNKERVVTVISHELAHQWFGNLVTLRWWND…
105	Apteryx mantelli	Apterygidae	A.man		MGAGFFISKSVGIVAIVLALGAVATIIALSVVYAQEKNKVSEPVAPSTTTTTATTTTTTAAPDNLWNRWRLPTTLKPQSYEVTLRPFLKPNENQMYIFTGNSTVVFICEEPTDIILIHSNKLNYTMQGNFHTSLQAVDGSSPPAITKTWLETTTQYLVVQLGAQLQKGHYYKLFSIFTGELADDLAGFYRSEYMDGTETKVVATTQMQAADARKAFPCFDEPAMKANFTVTIIHPTDHKAISNMPPKSTRQQQIDGESWNVTEFLTTPKMSTYLLAFIVSQFDSIENTSGNVLIRIWGRPQAIAEGQGSYALQVTGPILNFFERHYNTAYPLPKSDQVGLPDFNAGAMENWGLVTYRENSLLYDNVYSSIGNKERVVTVIAHELAHQWFGNLVTLRWWN…
106	Dromaius novaehollandiae	Casuariidae	D.nov		MAAGFFISKTVGIVAIVLALGAVATIIALSVVYAQEKNKASGSDATSTTTAASSTAAAPATTAAASNLWNSWRLPTTLKPESYEVTLRPFLTPDENQMYVFTGNSTVVFVCEEPTDIILIHSNKLNYTLQGGFHTSLQALDGSSAPAITSTWLETTTQYLVVQLAAQLQQGRYYSLFSIFTGELADDLAGFYRSEYEDGTETKVVATTQMEPTDARKAFPCFDEPAMKANFSVTIIHPSDHTALSNMPVRSTQQLQLDGESWNVTEFYTTPKMSTYLLAFIVSQFESVENTSGGVLIRIWGRPQAIAEGQGSYALQVTGPILNFFESHYNTSYPLPKSDQVGLPDFSAGAMENWGLVTYRENSLLYDNAYSSIGNRERVVTVIAHELAHQWFGNLVTLR…
107	Chroicocephalus ridibundus	Laridae	C.rid		MAAGFFISKSVGIVAIVLGLGAVATIIALSVVYAQEKNKGHISDPGNAETTTAVAETTTTAVAETTTTAIPKTTTTAVPATTAASSTTAVPDNPWNRWRLPKTLMPESYEVTLQPFLTPDTNNMYIFKGNSSVVFVCKEATNLILIHSNKLNYTMQGSFLVSLEAVDGSSAPLISKTWLESSTQYLVVQLEGQLQKDQRYRLFSIFTGELADDLAGFYRSEYVDELGNMKVVATTQMQAADARKAFPCFDEPAMKATFTVTLIHPSDHKAISNMPVNSTQQMNDDNNWNITTFQTTPKMSTYLLAFIVSEFDYVENTSENVLIRIWGRPKAIAEGQGAYALQVTGPILKFFEESYNMSYPLPKSDQVGLPDFNAGAMENWGLVTYRENSLLFDSNYSSI…
108	Rissa tridactyla	Laridae	R.tri		MAAGFFISKSVGIVAIVLGLGAVATIIALSVVYAQEKNKGTDPGNAETTTAAVPATTAASSTTAAPNNPWNRWRLPATLMPESYEVTLQPFLTPDANNMYIFKGNSSVVFVCKEATNLILIHSNKLNYTMQGSFLVSLEAVDGSSAPLISKTWLESPTQYLVVQLDGQLQKDRRYRLFSIFTGELADDLAGFYRSEYVDELGNTKVVATTQMQAADARKAFPCFDEPAMKATFTVTLIHPSDHKAISNMPVNSTQQMKDNNNWNITTFQTTPKMSTYLLAFIVSEFDYVENTSENVLIRIWGRPKAIAEGQGNYALKVTGPILKFFEESYNMSYPLPKSDQVGLPDFNAGAMENWGLVTYRENSLLFDNNYSSISNKERVVTVIAHELAHQWFGNLVTL…
109	Calidris pugnax	Scolopacidae	C.pug		MAAGFFISKTVGIVAIVLGVGAVATIIALSVVYAQEKNKVTDTGNTETTTTATTTTATTTTTPDPSLPWNRWRLPTNLMPELYEVTLQPFLKPDLNNMYIFKGNSSVVFVCKERTNLILIHSNKLNYTMQGSFMASLEAVDGSSVPRITKTWLVPLTQYLVVQLDGELQQNQRYRLSSSFTGELADDLAGFYRSEYVDSGETKVVATTQMQAADARKAFPCFDEPAMKANFSVTLIHPSDHSAISNMPAKRSQQVVIDKENWTITEFETTPKMSTYLLAFIVSQFNYTENKSDNVTIRIWGRPKAIAEKQGDYALQVTGPILKFFEGHYKTPYPLPKSDQVGLPDFNAGAMENWGLVTYRENSLLFDNNFSSIGNKERVVTVIAHELAHQWFGNLVTLK…
110	Limosa lapponica	Scolopacidae	L.lap		MAAGFFISKTVGIVAIVLGVGAVATIIALSVVYAQEKNKVTDTGNTETTTTATTNTAVTNTAVTTTTATSNTTVTTTTAVATTTADPSLPWNRWRLPTALMPELYEVTLQPFLKPDANNMYIFKGNSSVVFVCKEPTDLILIHSNKLNYTMQGSTMASLEAMDGSSAPRITKTWLVPLTQYLVVQLDGKLQQNQRYRLFSSFIGELADDLAGFYRSEYVDSGETKVVATTQMQAADARKAFPCFDEPAMKANFSVTLIHPSDHKAISNMPAKSTRQVVIDNVNWNVTEFETTPKMSTYLLAFIVSQFDYRENMSDNVLIRIWGRPKAIAENQGDYALQVTGPILKFFERHYSTPYPLPKSDQVGLPDFNAGAMENWGLVTYRENSLLFDNTFSSIGNKE…
111	Colius striatus	Coliidae	C.str		MAAGFFISKSMGIVAIVLAVGAVATIIALSVVYTQEKNKNMNANTADTTTTAATATAATASTSANPNDPWNRWRLPTALRPELYEVTLRPFLTPQDNAMYIFKGNSSVVFVCVEATDLIIIHSKKLNYTLQNNFLASLEAVSGSSVPRITETWLETTTQYLVVRLDSELQQGQSYRLFTEFTGELADDLAGFYRSEYQDSSGVNRVVATTQMQAADARKAFPCFDEPAMKANFSVTLIYPSDHGAISNMLPKDTWEQVIDGEAWKVTQFETTPKMSTYLLAFIVSQFSQVNETANNVLIRIWGRPEAISEGQGDYALQVTGPILNFFENHYNTPYPLKKSDQVGLPDFNAGAMENWGLVTYRENSLLFDNVYSSISNKERVVTVIGHELAHQWFGNLVT…
112	Columba livia	Columbidae	C.lia		MAAGFFISKSVGIVAIVLGVGAVATIIALSVVYAQEKNKVTDTADTPTTAATTTAATTSPTEAWNRWRLPTTLMPESYEVTLQPFLKPKDNSTYIFKGNSSVVFLCVEATNLILIHSNKLNYTQQGAFLASLQALDNSNVPAITRTWLETTTQYLVVQLESPLQQGQRYRLVSSFTGELADDLAGFYRSEYEDESGVRRVVATTQMQAADARKAFPCFDEPAMKANFTVTLIHPSDHHAISNMPPRSTWQQEIDGEMWNVTEFETTPKMSTYLLAFIVSQFSYVHNMSENVLIRIWGRPEAIAEGQGEYALQVTGPILKFFERHYNTAYPLPKSDQVGLPDFNAGAMENWGLVTYRENALLYDNTYSSIGNKERVVTVIAHELAHQWFGNLVTLRWWND…
113	Columba leucocephala	Columbidae	C.leu		MAAGFFISKSAGIVTIVLGVGAVATIIALSVVYARERNKVTDTADTPTTTAATTTAATTGPAEPWNRWRLPTTLMPESYEVTLQPFLKPKDNSTYIFKGNSSVVFLCVEATNLILIHSNKLNYTQQGAFLTSLQALDNSNVPSITRTWLETTTQYLVVQLEAPLQEGQRYRLVSSFTGELADDLAGFYRSEYEDELGVRRVVATTQMQATDARKAFPCFDEPAMKANFTVTLIHPSDHQAISNMPPRSTWQQEIDGEMWNVTEFETTPKMSTYLLAFIVSQFTYVHNTSENVLIRIWGRPEAIAEGQGEYALQVTGPILKFFERHYNTAYPLPKSDQVGLPDFNAGAMENWGLVTYRENALLYDNTYSSIGNKERVVTVIAHELAHQWFGNLVTLQWWN…
114	Cuculus canorus	Cuculidae	C.can		MAAGFFISKSVGIVAIVLGLGAVATIIALSVVYVQEKNKVTNPGTADTTTTTVPDTTTTTVPDTTTTTVPPTTVELPWNRWRLPTTLVPESYEVTLQPFLTPNANNMYIFEGNSSVIFLCKEATDLILIHSNKLNYTMQGSFHASLQAVDGSSVPPITSTWLETPTQYLVVQLGGLLTQGQRYKLFSIFTGELADDLAGFYRSEYTDELGTRKVVATTQMQAADARKAFPCFDEPAMKANFTVTLIHPSNHTALSNMPISDTQQLQINSESWNVTKFETTPRMSTYLLAFIVSEFSHVHTTAGNVLIRIWGRPTAIAEGQGNYALQVTGPILSFFEDHYNTTYPLPKSDQVGLPDFNAGAMENWGLVTYRENSLLFDDAYSSISNKERVVTVIAHELAH…
115	Falco biarmicus	Falconidae	F.bia		MAAGFFISKTVGIVGIVLALGAVATIIALSVVYAQEKNKVVDTTTAATTTTASTTTTTASTTTTTASTSKTTASTLPTIPPNTTAAPNNPWNRWRLPTTLMPESYEVTLQPFLIPDANNTYIFKGNSSVVFFCNNATDLILIHSNKLTYTKQNSFHALLQAVDGSSVPHITNTWLEIHTQYLVVQLDGMLQQGKRYRLFSIFTGELADDLAGFYRSEYVESGVKKVLATTQMQAADARKAFPCFDEPAMKATFTVKLIHPTDHNAISNMPIKSTRQQEIDGQSWNVTEFETTPKMSTYLLAFIVSQFNYTQNNSGDVLIRIWGRPEAIAEGQGDYALQKTGPILKFFEEHYNTSYPLPKADQVGLPDFNAGAMENWGLVTYRENSLLFDPAYSSIGNKE…
116	Falco cherrug	Falconidae	F.che		MAAGFFISKTVGIVGIVLALGAVATIIALSVVYAQEKNKVVDTTTAATTTTASTTTTTASTTTTTASTSKTTASTLPTIPPNTTAAPNNPWNRWRLPTTLMPESYEVTLQPFLIPDANNTYIFKGNSSVVFFCNNATDLILIHSNKLTYTKQNSFHALLQAVDGSSVPHITNTWLEIHTQYLVVQLDGMLQQGKRYRLFSIFTGELADDLAGFYRSEYVESGVKKVLATTQMQAADARKAFPCFDEPAMKATFTVKLIHPTDHNAISNMPIKSTRQQEIDGQSWNVTEFETTPKMSTYLLAFIVSQFNYTQNNSGDVLIRIWGRPEAIAEGQGDYALQKTGPILKFFEEHYNTSYPLPKADQVGLPDFNAGAMENWGLVTYRENSLLFDPAYSSIGNKE…
117	Gallus gallus	Phasianidae	G.gal		MAAGFFISKSVGIVGIVLALGAVATIIALSVVYAQEKNKSSGGSGGSDTTSTTTASTTTASTTAAPNNPWNRWRLPTALKPESYEVTLQPFLTPDDNNMYIFKGNSSVVFLCEEATDLILIHSNKLNYTLQGGFHASLHAVNGSTPPTISNTWLETNTQYLVLQLAGPLQQGQHYRLFSIFTGELADDLAGFYRSEYTEGNVTKVVATTQMQAPDARKAFPCFDEPAMKAVFTVTMIHPSDHKAISNMPAHSTYQLQMDGQSWNVTQFDPTPRMSTYLLAFIVSQFDYVENNTGKVQIRIWGRPAAIAEGQGEYALEKTGPILSFFERHYNTAYPLPKSDQVGLPDFNAGAMENWGLVTYRENSLLYDNAYSSIGNKERVVTVIAHELAHQWFGNLVTL…
118	Meleagris gallopavo	Phasianidae	M.gal		MAAGFFISKSVGIVGIVLALGAVATIIALSVVYAQEKNKSSGGSGSTDTTTTAASTTTAPNNPWNRWRLPAALKPESYEVTLQPFLTPDANNVYIFRGNSSVVFICEEATDLILIHSNKLNYTLQGGFHASLHAVDGPAPPAISNTWLQTDTQYLVVQLAGPLQQGQSYRLFSSFTGELADDLAGFYRSEYTEGNVTKVVATTQMQAPDARKAFPCFDEPAMKAVFTVTMIHPSDHTAISNMPANNTYQLEMDGQSWNVTQFNPTPKMSTYLLAFIVSQFDYVENNTGGVQIRIWGRPTAIDEGQGEYALQKTGPILSFFERHYNTAYPLPKSDQVALPDFNAGAMENWGLVTYRENSLLYDNAYSSIGNKERVVTVIAHELAHQWFGNLVTLRWWNDL…
119	Gavia stellata	Gaviidae	G.ste		MAAGFFISKSVGIVAIVLALGAAATIIALSVVYAQEKNKATDPGTATPPTTTTAASPATTAAPNNPWNRWRLPTTLMPESYEVTLQPFLTPDNNVYLFKGNSSVVFVCMEATDLILIHSNKLNYTMQGSFHTSLQAVNGSSVPAISKTWLEPTTQYLVVQLDGLLQQGQRYRLFSIFTGELADDLAGFYRSEYVDELGTKKVVATTQMQAADARKAFPCFDEPAMKARFTVTLIHPSDHVAISNMPARGTWQQEIDGKSWNVTEFETTPKMSTYLLAFIVSQFSYVQGTSGNVLIRIWGRPKAIAEGQGNYALQVTGPILKFFERHYNTAYPLPKSDQVGLPDFNAGAMENWGLVTYRENSLLFDDTYSSIGNKERVVTVIAHELAHQWFGNLVTLKWW…
120	Gallinula chloropus	Rallidea	G.chl		MAAGFFISKTVGIVAIVLGLGAVATIIALSVVYAQEKNKGTDPGTTATTTTTTGTNTNTTTTTGTTTTAAPNNPWNRWRLPTALKPEQYEVTLQPFLKPNENNMYIFKGNSTVEFLCMEATDLILIHSNKLNYTMQGTFHVSLQAVDSSSVPRITRTWLETLTQYLVVQLDSQLQQGQRYRLFSIFTGELADDLAGFYRSEYSDDTGNKVVATTQMQAPDARKAFPCFDEPAMKASFSVTLIHPSDHNAMSNMPVQSTQMQQIGEESWNVTKFETTPKMSTYLLAFIVSQFSCVGNNSGSVEIRICGRPSAINASQGEYALQVTGPILEFFEQHYNTAYPLPKSDQVGLPDFNAGAMENWGLVTYRENSLLFDKNYSSIGNKERVVTVIAHELAHQWFG…
121	Nyctibius grandis	Nyctibiidae	N.gra		MAAGFFISKSVGIVAIVLALGAVATIIALSVVYAQEKNRSAEPGAADTTPAAPTTTAAPDNPWNRWRLPTALTPESYEVTLQPFLTPDADGLYIFKGNSSVVFLCAEATDLILIHSNKLNYTLQGSFHASLQALDGPAAPPISSTWLETPTQYLVVRLEGPLQPGQRYRLFSIFTGELADDLAGFYRSEYVDEAGVKKVVATTQMQAADARKAFPCFDEPAMKANFTVTLIHPSDHEAISNMPATSTRQQEIDGKSWNVTEFQTTPRMSTYLLAFIVSQFSYVQNTSGDVLIRIWGRPTAIAEGQGDYALQVTGPILNFFERHYNTPYPLPKSDQVGLPDFNAGAMENWGLVTYRENSLLFDDAYSSIGNKERVVTVIGHELAHQWFGNLVTLRWWNDL…
122	Chamaea fasciata	Paradoxornithidae	C.fas		MAAGFFISKTVGIVAIVLGVGAVATIIALSVVYAQEKNKGTPDVGIGTTTSPSITTNTSSTTSAPSNLWNRWRLPTTLKPESYEVSLQPFLKPDANNMYIFKGNSSVVFVCEEATDLILIHSNKLNYTMQGSFHATLQAVDGGTAPAISSTWLETPTQYLVVQLASPLQQGQRYRLSSSFTGELADDLAGFYRSEYTDESGNKQVVATTQMQAADARKAFPCFDEPAMKATFTVTLIHPSNYTAISNMPAKNTMEQMMNGESWNVTEFETTPRMSTYLLAFIVSQFTKVENNSENTLIRIWGRPKAIRDGQGDYALNVTGRILKFFEEHYNTSYPLPKSDQVGLPDFNAGAMENWGLVTYRENSLLFDAAYSSIGNKERVVTVIAHELAHQWFGNLVTL…
123	Corvus moneduloides	Corvidae	C.mon		MAAGFFISKTVGIVAIVLGLGAVATIIALSVVYAQEKNKGTSDVGTSSTPGPNITTTPTSTPTPNNPWNRWRLPTTLKPDSYEVSLQPFLKADANNMYIFKGNSSVVFICMEATNLILIHSNKLNYTMHGSFHATLQAEGGGSAPAISRTWLETPTQYLVVQLETPLQQGQRYRLSCNFTGELADDLAGFYRSEYTDKSGNKQVVATTQMQAADARKAFPCFDEPAMKANFTVTLVHPSNYVAISNMPAKNTMQQMIDGEAWNVTEFETTPRMSTYLLAFIVSQFTYVQNDSESTLIRIWGRPEAISEGQGNYALNVTGPILSFFEGHYNTAYPLPKSDQVGLPDFNAGAMENWGLVTYRENSLLFDAAYSSIGNKERVVTVIAHELAHQWFGNLVTLR…
124	Catharus ustulatus	Turdidae	C.ust		MAAGFFISKTVAIVAIVLGVGAVATIIALSVVYAQEKNKTTSDVGTTAGPGTTTTASTPAPNNPWNRWRLPATLKPESYEVTLQPFLTPDANNMYIFKGNSSVVFVCEQATDLILIHSNKLNYSMQGSFHATLQAEGGGSAPAISRTWLETSTQYLVVQLSAPLQQGQRYRLFSSFTGELADDLAGFYRSEYTESGIQHVVATTQMQAADARKAFPCFDEPAMKATFKVTMIHPSEYKAISNMPANATRQVDIDGQSWNVTEFDTTPRMSTYLLAFIVSNFSYVEDNSSNKQIRIWGRPKAIDDEGQGEYALSVTGRILTFFEGHYNTTYPLPKSDQVGLPDFNAGAMENWGLVTYRENSLLFHPEYSSIANKERVVTVIAHELAHQWFGNLVTLRWWN…
125	Erithacus rubecula	Muscicapidae	E.rub		MAAGFFISKTVGIVAIVLGVGAVATIIALSVVYAQEKSKVTSDVGTTTTVRPGTTVRPGTTVRPGTTVRPGITTTATTATTATPVPNNPWNRWRLPTTLRPESYEVTLQPYLTPDANGMYIFTGNSSVVFLCEEATNLILIHSNKLNYTRQGGFLARLQVEGGGIAPFIRSTWLETSTQYLVVRLLSNLRPGQRYRLTTRFTGELADDLAGFYRSEYTDESGNKIVVATTQMQAPDARKAFPCFDEPAMKATFTVTLIHPHNYTAISNMPAKNTSQQIIDGETWTVTEFDTTPRMSTYLLAFIVSPFRYVEDNSSNPLIRIWGRPKAIAEGQGEYALSVTGPILKFFADYYNTSYPLPKSDQVGLPDFNAGAMENWGLVTYRENSLLFIDGFSSIGNKE…
126	Lonchura striata	Estrildidae	L.str		MAGGFFISKTVGIVAIVLGLGAVATIIALSVVYAQEKNKGVSDVGTSTTASPGTGTTASLGTSTTASPGTGTTASLGTSTTASPGTNTTASPGTSTTASPGTNTTASPGTSTTTPAPNNPWNQWRLPATLKPEFYEVSLQPFLKPDANNMYIFKGNSSVVFMCEKATDLILIHSKKLNYTMQGSFHATLQAEGGGNAPAISRTWLETPTEYLVVQLGAPLQQGQRYRLSSSFTGELADDLAGFYRSEYTDESGSKQVVATTQMQAADARKAFPCFDEPAMKANFTVTLIYPSGYEAISNMPAKNTREQVIDGVTWNVTEFDTTPRMSTYLLAFIVSRFSHVERISNNTLIRIWGRPKAISEGQGDYALNVTGPILNFFEDHYKTSYPLPKSDQVGLPDF…
127	Passer domesticus	Passeridae	P.dom		MAGGFFISKTVGIVAIVLGLGAVATIIALSVVYAQEKNKGTSDVGSNTTASPDTSTTTPAPNNPWNRWRLPTTLKPEFYEVSLQPFLKPDANNMYIFKGNSSVVFLCEEATNLILIHSKKLSYTMQGSFHATLKAEGGGSAPAISSTWLENTTQYLVVQLEAPLQQGQRYRLSSNFTGELADDLAGFYRSEYTDESGIKQVVATTQMQAADARKAFPCFDEPAMKANFSVTLIHPSGYKAISNMPAKNTSELEIDGEIWNVTEFYTTPRMSTYLLAFIVSQFTSVDNSSEGTLIRIWGRPKAIDEGQGDYALKVTGPILSFFEKHYNTAYPLPKSDQVGLPDFNAGAMENWGLVTYRENSLLFDANYSSIGNKERVVTVIAHELAHQWFGNLVTLRWWN…
128	Pycnonotus jocosus	Pycnonotidae	P.joc		MAAGFFISKTVGIVAIVLGLGAVATIIALSVVYAQEKNKGTPDVGTTARPSISTTTTTTTPAPNNPWNRWRLPTTLKPEFYEVSLQPFLKPDANNMYIFKGNSSVVFTCEEATNLILIHSNKLNYTMQGSFHATLQAEDGGTAPAISNTWLETPTQYLVVQLATPLQQGQRYRLSSSFTGELADDLAGFYRSEYTDASGNRQVVATTQMQAADARKAFPCFDEPAMKANFTVTLIHPSNYTAISNMPAKNTREQVIDGESWNVTEFDTTPRMSTYLLAFIVSQFDNVYNDSGDVLIRIWGRREAIEEGQGSYALNVTGPILEFFEKHYNTSYPLPKSDQVGLPDFNAGAMENWGLVTYRENSLLFDDLYSSIANKERVVTVIAHELAHQWFGNLVTLRW…
129	Vidua chalybeata	Viduidae	V.cha		MAGGFFISKTVGIVAIVLGLGAVATIIALSVVYAQEKNKGASDVGTSTTASPGTSATASPGTSTTASPGTSTTASPGTSTTAGPGTSTTTPASNNPWNRWRLPNTLKPEFYEVSLQPFLKPDANNMYIFKGNSSVVFMCEKATDLILIHSKKLNYTMQGSFHATLQAEGGGNAPAISRTWLETPTQYLVVQLDAPLQQGQRYRLSSSFTGELADDLAGFYRSEYTDESGNKQVVATTQMQAADARKAFPCFDEPAMKANFTVTLIYPSSYGAISNMPAKNTGEQVIDGETWKVTEFHTTPRMSTYLLAFIVSRFKAVERSEKTLIRIWGRPKAIAEGQGDYALNVTGPILSFFEDHYNTPYPLPKSDQVGLPDFNAGAMENWGLVTYRENSLLFDAAYS…
130	Zonotrichia leucophrys	Passerellidae	Z.leu		MAGGFFISKTVGIVAIVLGLGAVATIIALSVVYAQEKNKGISDVGTSTTASPVTSTSTSTSTSTSTPAPSNPWNKWRLPATLKPEFYEVSLQPFLKPDANNMYIFKGNSSVVFLCEEATDLILIHSKNLNYTMQGTFHATLQAEDGGTPPAISRTWLETPTQYLVVQLNAPLQQGKRYRLSSSFTGELADDLAGFYRSEYTDASGNKQVVATTQMQAADARKAFPCFDEPAMKANFTVTLIHPSDYGAISNMPAENTTQQEIDGEIWNVTKFYTTPRMSTYLLAFIVSQFDYVENKTGNNTLIRIWGRPEAIDEGQGAYALNVTGPILNFFEKHYNTAYPLPKSDQVGLPDFNAGAMENWGLVTYRENSLLFDAVYSSIGNKERVVTVIAHELAHQWFG…
131	Turdus merula	Turdidae	T.mer		MAAGFFISKTVAIVAIVLGVGAVATIIALSVVYAQEKNKTADVGTTAGPGTTTTTSTPAPNNPWNRWRLPDTLKPETYEVTLQPFLTPNANNTYIFKGNSSVVFVCEKATDLILIHSNKLTYDMQGSSHVRLEAVGDGSAPSISQSWLETSTQYLVVQLSASLQQGQRYRLFSSFTGELADDLAGFYRSEYTESGNKYVVATTQMQAADARKAFPCFDEPAMKANFTVTMIHPADYTAISNMPVKETRPVSINGENWNVTEFYTTPRMSTYLLAFIVSNFSYVHNYTSEKLIRIWGRPKAINEEGQGAYALSVTGPILSFFEKHYNTAYPLPKSDQVGLPDFNAGAMENWGLVTYRENSLLFHPEYSSIANKERVVTVIAHELAHQWFGNLVTLRWWND…
132	Turdus rufiventris	Turdidae	T.ruf		MAAGFFISKTVAIVAIVLGVGAVATIIALSVVYAQEKNKTADVGTTAGPGTTTTTTTPAPNNPWNRWRLPDTLKPETYEVTLQPFLTPDANNTYIFKGNSSVVFVCEKATDLILIHSNKLTYDMQGSSHVRLEAVGDGSAPSISQSWLETSTQYLVVRLSASLQQGQRYRLFSSFTGELADDLAGFYRSEYTESGNKYVVATTQMQAADARKAFPCFDEPAMKANFTVTMIHPADYTAISNMPVKETRPVSINGENWNVTEFYTTPRMSTYLLAFIVSNFSYVHNYTSEKLIRIWGRPKAIDEEGQGAYALSVTGPILSFFEQHYNTAYPLPKSDQVGLPDFNAGAMENWGLVTYRENSLLFHPEYSSIANKERVVTVIAHELAHQWFGNLVTLRWWND…
133	Turdus torquatus	Turdidae	T.tor		MAAGFFISKTVAIVAIVLGVGAVATIIALSVVYAQEKNKTADVGTTAGPGTTTTTSTPAPNNPWNRWRLPDTLKPETYEVTLQPFLTPDANNTYIFKGNSSVVFVCEKATDLILIHSNKLTYDMQGSSHVRLEAVGDGSAPSISQSWLETSTQYLVVQLSASLQQGQRYRLFSSFTGELADDLAGFYRSEYTESGNKYVVATTQMQAADARKAFPCFDEPAMKANFTVTMIHPADYKAISNMPVKETRPVSINGENWNVTEFYTTPRMSTYLLAFIVSNFSYVHNYTSEKLIRIWGRPKAIDEEGQGAYALSVTGPILSFFEKHYNTAYPLPKSDQVGLPDFNAGAMENWGLVTYRENSLLFHPEYSSIANKERVVTVIAHELAHQWFGNLVTLRWWND…
134	Turdus viscivorus	Turdidae	T.vis		MAAGFFISKTVAIVAIVLGVGAVATIIALSVVYAQEKNKTTPDVGTTAGPGTTTTTSTPAPNNPWNRWRLPDTLKPESYEVTLQPFLTPDANNTYIFKGNSSVVFVCEKATDLILIHSNKLTYDMQGSLHATLEAVGGGSAPSISNTWLETSTQYLVVQLSASLQQGQRYRLFSSFTGELADDLAGFYRSEYTESGNKYVVATTQMQAADARKAFPCFDEPAMKASFTVTMIHPADYKAISNMPVKETRPVSINGENWNVTVFQTTPRMSTYLLAFIVSNFSYVHSYTSDKLIRIWGRPKAIDEEDQGAYALSVTGPILSFFEGHYNTAYPLPKSDQVGLPDFNAGAMENWGLVTYRENSLLFHPEYSSIANKERVVTVIAHELAHQWFGNLVTLRWWN…
135	Gorsachius goisagi	Ardeidae	G.goi		MAAGFFISKSVGIVAIVLGLGAVATIIALSVVYAQEKNKVADPGTGGSVTTTTPTTTTTTTTTTRPHPPTTATTTTTTTTTTTTTTTTARPSPGATTTAASNNPWDRWRLPTTLIPEYYEVTLQPFLTAQDNLYIFKGNSSVVFICKEATDLILIHSNKLNYTKQGSFLTSLEPVDGSSVPGITATWLETRTQYLVVQLDSPLQQGQRYRLVSIFTGELADDLAGFYRSEYVDGEGNKKVVATTQMQAADARKAFPCFDEPAMKANFTVTLIHPHDHEAISNMPARRTWQQEINGSTWNVTEFETTPKMSTYLLAFIVSQFTYVHNDSGSVLIRIWGRPEAIAEGQGAYALQVTGPILEFFEKHYNTAYPLPKSDQVGLPDFNAGAMENWGLLTYRENS…
136	Melanerpes formicivorus	Picidea	M.for		MAAGFFISKGVGIAAIVLGLGAVATIIALSVVYTQEKEKNNSPEPGATTPAAPTTSAAPTTPAAPTTPAPDNAWNRWRLPTALVPESYEVTLQPYLQPEDQASYIFTGNSSVVFLCKEATDLILIHSNKLNYTMQGSFLVSLQAVDSATVPPITETWLEVPTQYLVVRLGEKLEQGKRYQLFSSFTGELADDLAGFYRSEYTDGTGTRKVVATTQMQATDARKAFPCFDEPAMKANFTVTLIHPPDHVAISNMPAIDSRQQQFDGETWNVTTFETTPKMSTYLLAFIVSQFDYVQNDSGKVLIRIWGRPEAIEEGQGDYALQVTGPILTFFEGHYNTTYPLPKSDQVGLPDFNAGAMENWGLVTYRENSLLYDTNYSSISNKERVVTVIAHELAHQWFG…
137	Lathamus discolor	Psittaculidae	L.dis		MAAGFFISKSVAVVAAVLSLGAVATIIALSVVYAQEKHKATDVGTADPSATSPSATSPSATNTAATAASVASTTPLVLNAWDKWRLPTTLMPEFYEVTLQPFLTPDANNMYIFKGNSSVVFVCVEATDLILIHSKNLNYTLQGSFHASLQAVDGSSVPPITRTWLQPTTQYLVVQLGSPLQQGQRYRLFSIFTGELADDLAGFYRSEYVDESGTNRVVATTQMQAADARKAFPCFDEPAMKANFTVTLIHPSDHEAISNMPVRSTQQQQIDGNTWNITEFETTPRMSTYLLAFIVSQFTYVQNVSENVLIRIWGRPAAIAEGQGEYALQVTGPILNFFERHYNTAYPLPKSDQVGLPDFNAGAMENWGLVTYRENSLLFDDAYSSTGNKERVVTVVAHE…
138	Athene cunicularia	Strigidae	A.cun		MAAGFFISKSVGIVAIVLALGAVATIIALSVVYAQEKNKVTDVGTTTTTTAAPRPTTAGPPITDTAPTTAVSPSSAGPEYAWNRWRLPTTLTPESYEVTLQPFLTPDANNVYIFKGNSSVVFICTEATDLILIHSNKLNYTLQGSFHASLQAVDGSRVPPISSTWLETPTQYLVVQLGSSLQRGQRYRLITIFTGELADDLAGFYRSEYVNASGVKKVVATTQMQAADARKAFPCFDEPAMKANFTVTLIHPSDHKAISNMPVTRTWQQQIDGKSWNVTEFQTTPRMSTYLLAFIVSQFDYVESNESNVLIRIWGRPEAIAEGQGSYALQVTGPILSFFEKHYNTSYPLPKSDQVGLPDFNAGAMENWGLVTYRENSLLFDNAYSSIGNKERVVTVIAH…
139	Struthio camelus	Struthionidae	S.cam		MAAGFFISKSVGIVAIVLALGAVATIIALSVVYAQEKNKPAAPSASTATTTTTTTTTAPITTAAPSNLWNQWRLPTALKPESYEVTLRPFLKPNENQMYIFTGNSTVVFICEEPTDIILIHSNKLNYTMQGGFHISLQVVDGSSPPAINKTWLETTTQYLVVQLAAPLQKGQYYRLFSIFTGELADDLAGFYRSEYMDGTETKVVATTQMQATDARKAFPCFDEPAMKANFTVTIIHPTDHKAISNMPAKSTWQQQIDGESWNVTEFLTTPKMSTYLLAFIVSQFESVENTSGRVLIRIWGRPQAIAEGQGSYALQVTGPILSFFEQHYNTSYPLPKSDQVGLPDFNAGAMENWGLVTYRENSLLYDNAYSSIGNKERVVTVIAHELAHQWFGNLVTLR…
